# Supplementary material for: Catalyst-free tandem reaction of 2,2′-diaminodiphenyldisulfides, sulfinic acids and aromatic aldehydes: an approach to synthesize unsymmetric thiosulfonates and benzothiazoles
Source: Royal Society of Chemistry journal article supplement (doi:10.1039/d1gc04878c), 2022-01-01
Supplement: d1gc04878c1.pdf [file d1gc04878c1.pdf]

## ***Supporting Information***

### **Catalyst-free tandem reaction of 2,2'- diaminodiarlyldisulfides, arylsulfonic acids and aromatic aldehydes: an approach to synthesize unsymmetric thiosulfonates and benzothiazoles**

Ziyang Li, Chao Zhou, Ruyi Ye, and Ling-Guo Meng

*Key Laboratory of Green and Precise Synthetic Chemistry and Applications, Ministry of Education; School of Chemistry and Materials Science, Huaibei Normal University, Huaibei, Anhui 235000, P R China, E-mail: menglg59@chnu.edu.cn*

#### ***Table of Contents***

|                                                                                                                        |     |
|------------------------------------------------------------------------------------------------------------------------|-----|
| 1. General remarks.....                                                                                                | S2  |
| 2. General procedure for the synthesis of unsymmetric thiosulfonates and benzothiazoles.....                           | S3  |
| 3. Characterization data and <sup>1</sup> H ( <sup>13</sup> C) NMR spectra of the products in Control experiments..... | S3  |
| 4. Free radical capture experiment.....                                                                                | S6  |
| 5. Characterization data for the products.....                                                                         | S7  |
| 6. <sup>1</sup> H and <sup>13</sup> C NMR spectra of the products.....                                                 | S20 |
| 7. Reference .....                                                                                                     | S57 |

## 1. General remarks

All reactions were conducted in clean glassware with magnetic stirring. Chromatographic purification was performed on silica gel (400~500 mesh) and analytical thin layer chromatography (TLC) on silica gel HG/T2354-2010 GF254 (Qindao), which was detected by fluorescence.  $^1\text{H}$  NMR and  $^{13}\text{C}$  NMR spectra were measured on a Bruker Avance NMR spectrometer (600 MHz) in  $\text{CDCl}_3$  as solvent, and tetramethylsilane (TMS;  $\delta = 0.00$  ppm) served as an internal standard for  $^1\text{H}$  NMR. The corresponding residual non-deuterated solvent signal ( $\text{CDCl}_3$ ;  $\delta = 77.00$  ppm) was used as internal standard for  $^{13}\text{C}$  NMR.  $^1\text{H}$  NMR data are reported as follows:  $\delta$ , chemical shift; coupling constants ( $J$  are given in Hertz, Hz) and integration. Abbreviations to denote the multiplicity of a particular signal were s (singlet), d (doublet), t (triplet), q (quartet), and m (multiplet). High resolution mass spectra were obtained with Thermo Scientific LTQ Orbitrap XL mass spectrometer or Thermo Scientific Q Exactive mass spectrometer (ESI). Melting points were determined on a digital melting point apparatus and temperatures were uncorrected.

## 2. General procedure for the synthesis of unsymmetric thiosulfonates and benzothiazoles

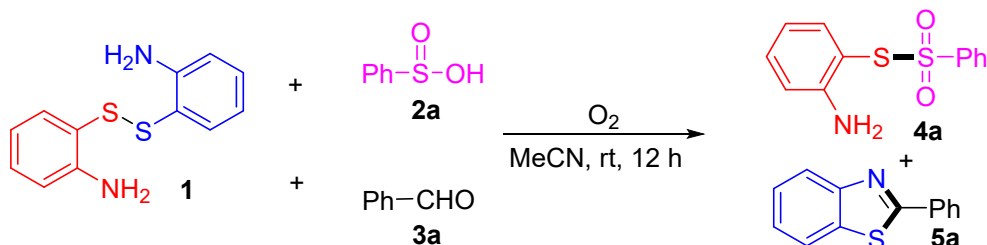

To a solution of 2,2'-diaminodiphenyl disulfides (0.25 mmol) in 2 mL of MeCN was added benzenesulfinic acid (0.2 mmol) and benzaldehyde (0.2 mmol) under oxygen atmosphere. The reaction mixture was stirred for 12 h at room temperature. The residue was then purified by column chromatography on silica gel (petroleum ether/EtOAc = 10:1) to give the pure products **4** and **5**.

### Typical procedure for the synthesis of *S*-(2-aminophenyl) benzenesulfonothioate (**4a**) and 2-phenylbenzo[*d*]thiazole (**5a**) in 6.0 mmol scale

To a solution of 2,2'-diaminodiphenyl disulfides (1.86 g, 7.5 mmol) in 20 mL of MeCN was added benzenesulfinic acid (853 mg, 6 mmol) and benzaldehyde (637 mg, 6 mmol) under oxygen atmosphere. The reaction mixture was stirred for 24 h at room temperature. The residue was then purified by silica gel column chromatography (petroleum ether/EtOAc = 10:1) to give pure product compound **4a** (1.13 g, 71% yield) and **5a** (1.04 g, 82% yield).

## 3. Characterization data and <sup>1</sup>H (<sup>13</sup>C) NMR spectra of the products in

### Control experiments

#### 2-(Phenyldisulfanyl)aniline(**8**)<sup>1</sup>

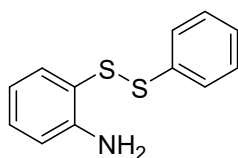

Pale yellow solid. Mp: 74–76 °C (lit.<sup>1</sup> 72–74 °C). <sup>1</sup>H NMR (600 MHz, CDCl<sub>3</sub>): 7.52–7.51

(m, 2H), 7.30–7.25 (m, 4H), 7.13 (td,  $J = 7.5, 1.2$  Hz, 1H), 6.69 (dd,  $J = 7.8, 1.2$  Hz, 1H), 6.61 (td,  $J = 7.5, 1.2$  Hz, 1H), 4.27 (s, 2H).  $^{13}\text{C}$  NMR (150 MHz,  $\text{CDCl}_3$ ):  $\delta$  148.0, 137.2, 135.3, 131.2, 130.3, 129.0, 127.9, 118.9, 118.3, 115.4.

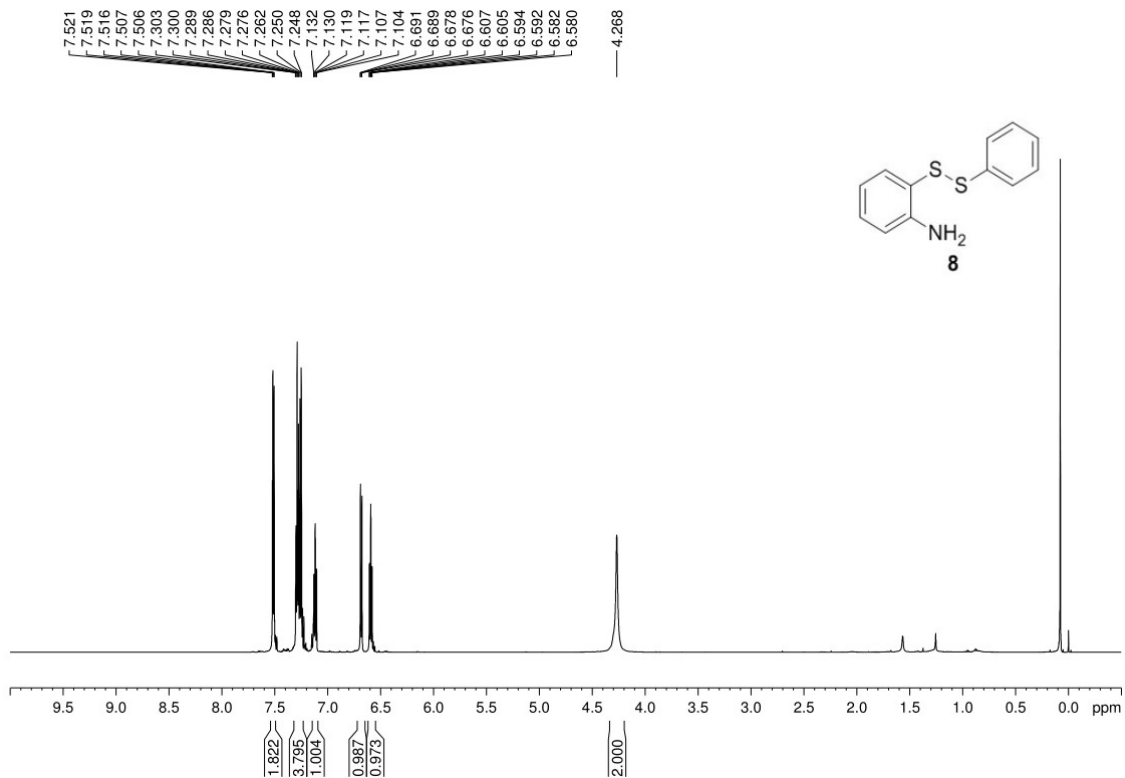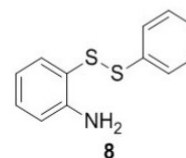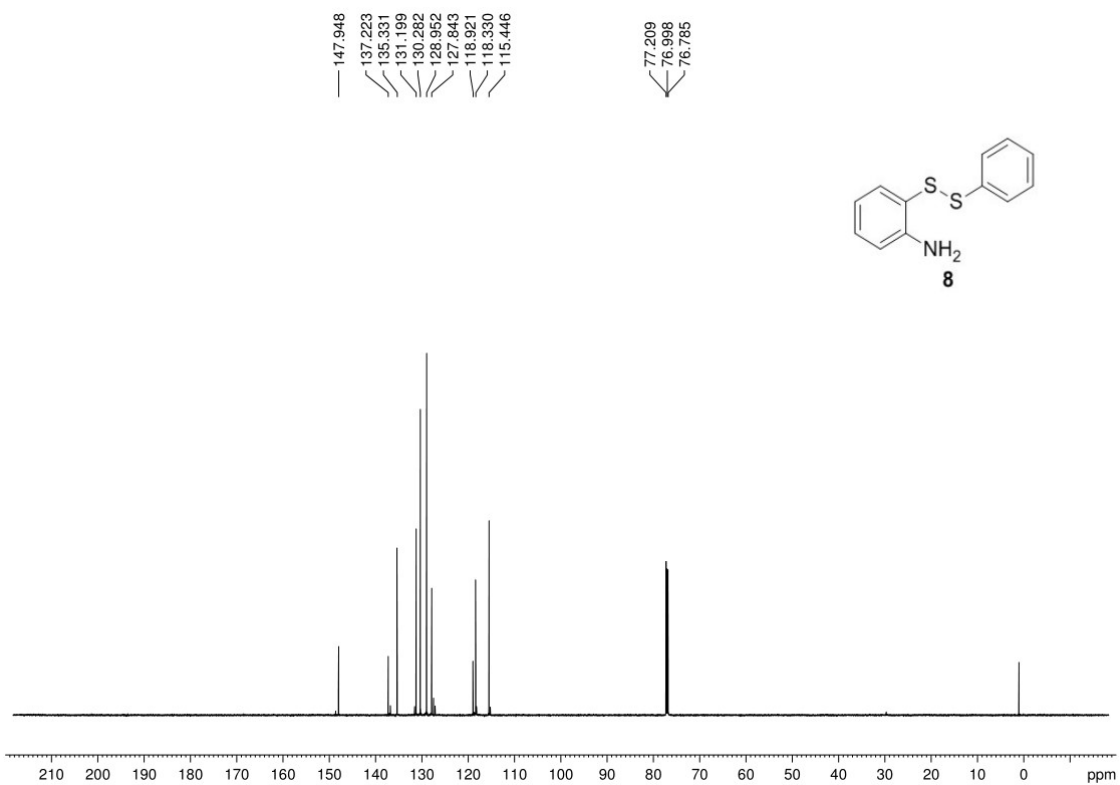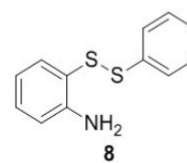

### *S*-phenyl benzenesulfonylthioate(9)<sup>2</sup>

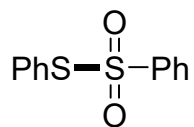

Yellow solid (33.9 mg, 68% yield). Mp: 41–43 °C (lit.<sup>2</sup> 45–47 °C). <sup>1</sup>H NMR (600 MHz, CDCl<sub>3</sub>): δ 7.59–7.55 (m, 3H), 7.48–7.46 (m, 1H), 7.43 (t, *J* = 7.8 Hz, 2H), 7.36–7.32 (m, 4H). <sup>13</sup>C NMR (150 MHz, CDCl<sub>3</sub>): δ 142.9, 136.6, 133.6, 131.4, 129.4, 128.8, 127.8, 127.5.

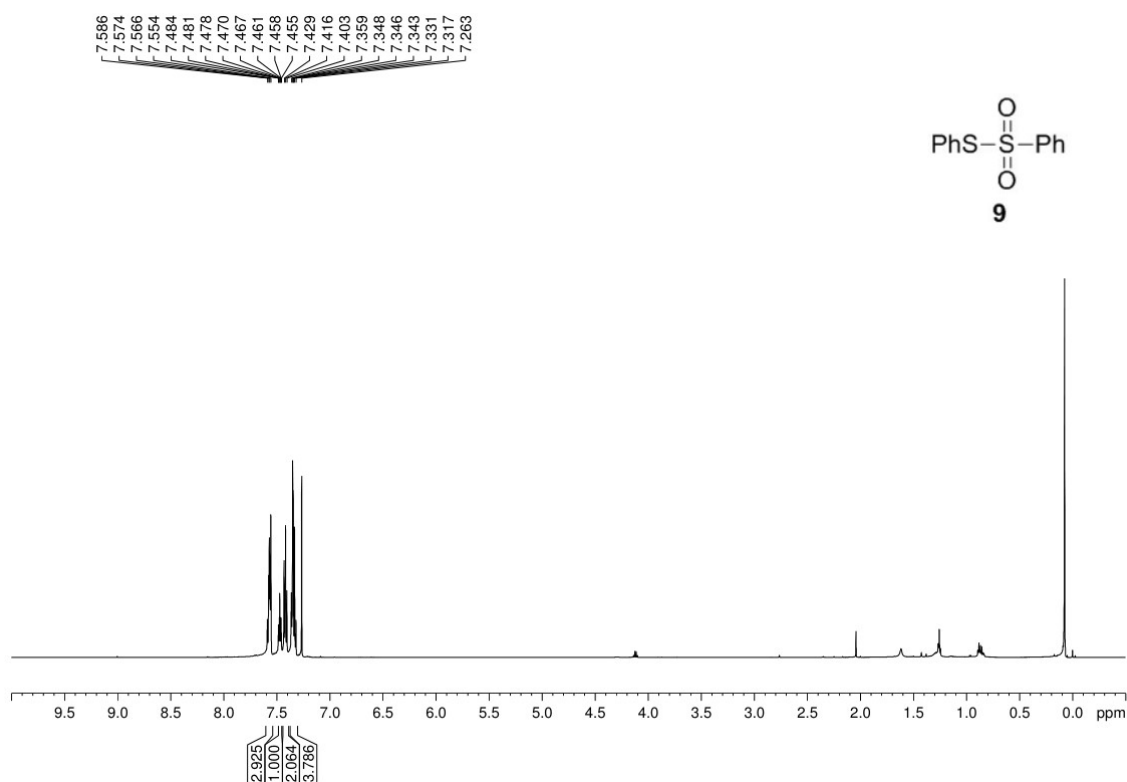

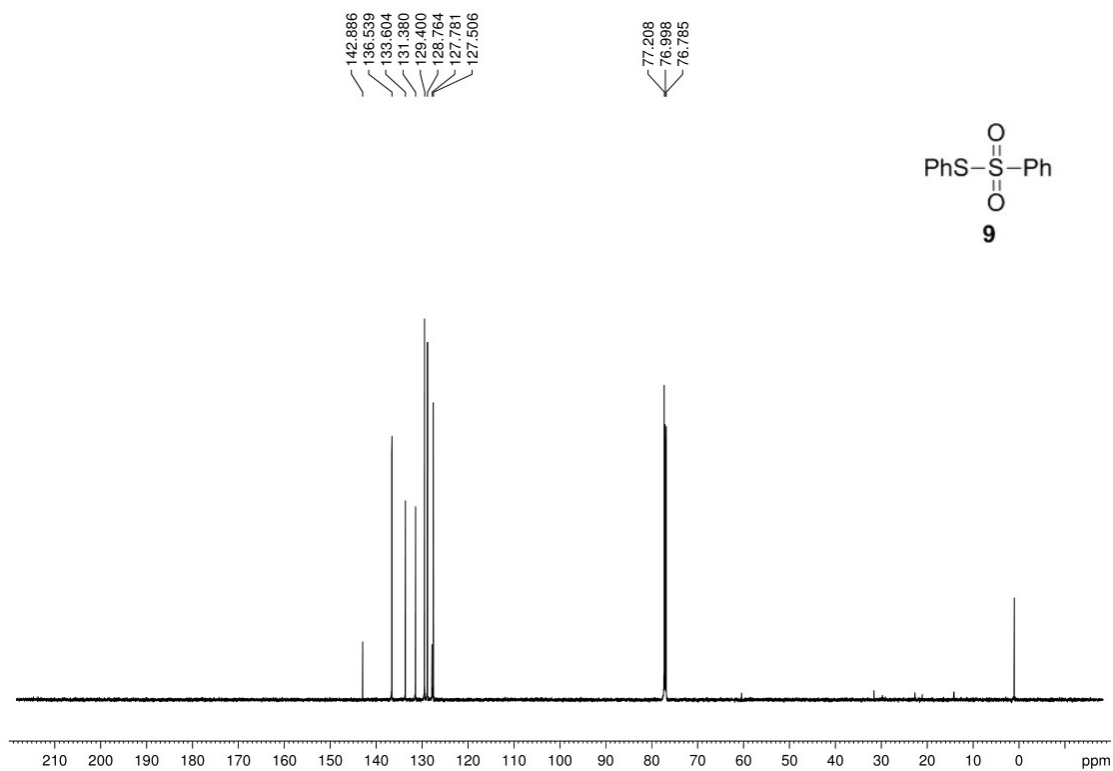

#### 4. Free radical capture experiment

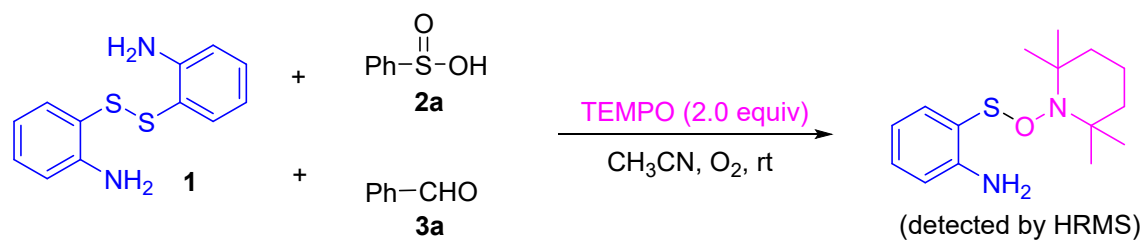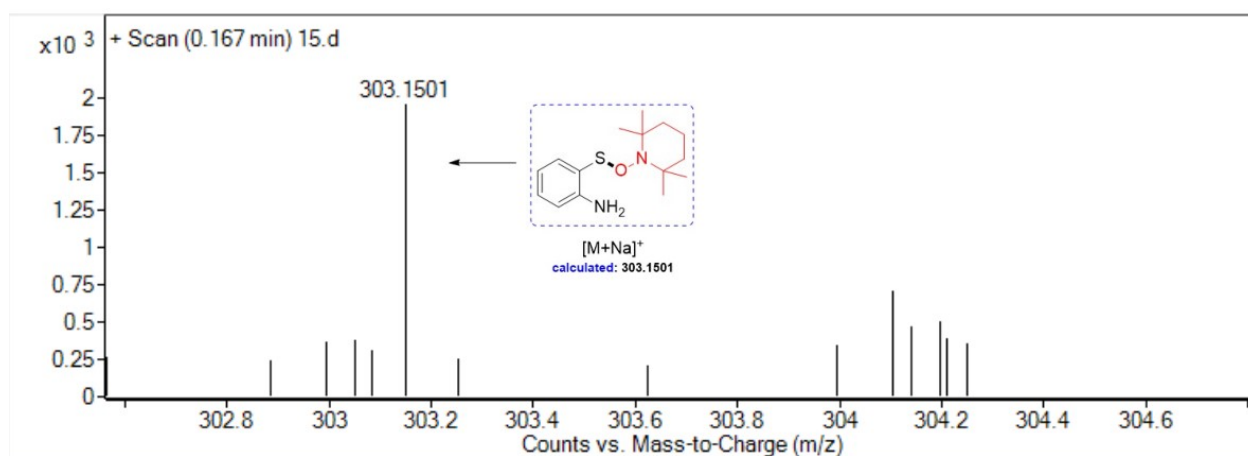

Figure S1. HRMS spectra of free radical capture experiment

## 5. Characterization data for the products

### ***S*-(2-Aminophenyl) benzenesulfonylthioate (4a)**

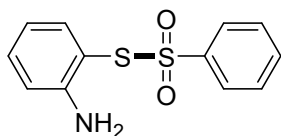

Yellow solid (47.8 mg, 90% yield). Mp: 81.7–83.7 °C (lit.<sup>3</sup> 83–83.5 °C). <sup>1</sup>H NMR (600 MHz, CDCl<sub>3</sub>): δ 7.64 (d, *J* = 7.8 Hz, 2H), 7.60 (t, *J* = 7.2 Hz, 1H), 7.44 (t, *J* = 7.8 Hz, 2H), 7.22 (t, *J* = 7.8 Hz, 1H), 6.90 (d, *J* = 7.8 Hz, 1H), 6.70 (d, *J* = 8.4 Hz, 1H), 6.56 (t, *J* = 7.8 Hz, 1H), 4.22 (s, 2H). <sup>13</sup>C NMR (150 MHz, CDCl<sub>3</sub>): δ 150.3, 142.7, 138.3, 133.7, 133.5, 128.8, 127.5, 118.4, 115.8, 109.6. HRMS (ESI) calcd for C<sub>12</sub>H<sub>12</sub>NO<sub>2</sub>S<sub>2</sub> (M+H)<sup>+</sup> : 266.0304; Found: 266.0307.

### ***S*-(2-Aminophenyl) 4-methoxybenzenesulfonylthioate (4b)**

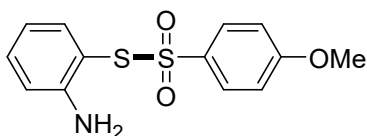

Yellow solid (36.7 mg, 62% yield). Mp: 126–128 °C. <sup>1</sup>H NMR (600 MHz, CDCl<sub>3</sub>): δ 7.57 (d, *J* = 8.4 Hz, 2H), 7.23 (t, *J* = 7.8 Hz, 1H), 6.93 (d, *J* = 7.8 Hz, 1H), 6.89 (d, *J* = 9.0 Hz, 2H), 6.71 (d, *J* = 7.8 Hz, 1H), 6.59 (t, *J* = 7.2 Hz, 1H), 3.98 (s, 2H), 3.87 (s, 3H). <sup>13</sup>C NMR (150 MHz, CDCl<sub>3</sub>): δ 163.7, 150.3, 138.5, 134.7, 133.4, 129.9, 118.5, 115.9, 113.9, 110.3, 55.7. HRMS (ESI) calcd for C<sub>13</sub>H<sub>14</sub>NO<sub>3</sub>S<sub>2</sub> (M+H)<sup>+</sup> : 296.0410; Found: 296.0413.

### ***S*-(2-Aminophenyl) 4-methylbenzenesulfonylthioate (4c)**

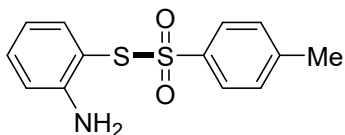

Yellow solid (50.5 mg, 90% yield). Mp: 104–106 °C (lit.<sup>4</sup> 105–106 °C). <sup>1</sup>H NMR (600 MHz, CDCl<sub>3</sub>): δ 7.53 (d, *J* = 7.8 Hz, 2H), 7.23–7.20 (m, 3H), 6.91 (d, *J* = 7.8 Hz, 1H), 6.72 (d, *J* = 8.4 Hz, 1H), 6.58 (t, *J* = 7.2 Hz, 1H), 4.02 (s, 2H), 2.43 (s, 3H). <sup>13</sup>C NMR (150 MHz, CDCl<sub>3</sub>): δ 150.3, 144.8, 140.2, 138.4, 133.5, 129.5, 127.6, 118.6, 116.0, 110.2,

21.7. HRMS (ESI) calcd for  $C_{13}H_{14}NO_2S_2$  (M+H)<sup>+</sup> : 280.0460; Found: 280.0462.

**S-(2-Aminophenyl) 4-propylbenzenesulfonylthioate (4d)**

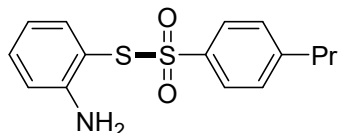

Yellow solid (39.9 mg, 65% yield). Mp: 148.4–150.4 °C. <sup>1</sup>H NMR (600 MHz, CDCl<sub>3</sub>): δ 7.54 (d, *J* = 8.4 Hz, 2H), 7.22 (d, *J* = 8.4 Hz, 2H), 7.20 (d, *J* = 7.8 Hz, 1H), 6.89 (d, *J* = 7.8 Hz, 1H), 6.70 (d, *J* = 7.8 Hz, 1H), 6.55 (t, *J* = 7.2 Hz, 1H), 4.25 (s, 2H), 2.65 (t, *J* = 7.8 Hz, 2H), 1.67–1.61 (m, 2H), 0.93 (t, *J* = 7.2 Hz, 3H). <sup>13</sup>C NMR (150 MHz, CDCl<sub>3</sub>): δ 150.3, 149.4, 140.1, 138.3, 133.4, 128.8, 127.6, 118.4, 115.8, 109.9, 37.7, 24.0, 13.5. HRMS (ESI) calcd for  $C_{15}H_{18}NO_2S_2$  (M+H)<sup>+</sup> : 308.0773 ; Found: 308.0770.

**S-(2-Aminophenyl) 4-(tert-butyl)benzenesulfonylthioate (4e)**

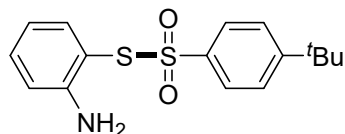

Yellow solid (50.7 mg, 79% yield). Mp: 72–75 °C. <sup>1</sup>H NMR (600 MHz, CDCl<sub>3</sub>): δ 7.57 (d, *J* = 8.4 Hz, 2H), 7.44 (d, *J* = 8.4 Hz, 2H), 7.21 (t, *J* = 7.8 Hz, 1H), 6.90 (d, *J* = 7.8 Hz, 1H), 6.71 (d, *J* = 8.4 Hz, 1H), 6.55 (t, *J* = 7.2 Hz, 1H), 4.14 (s, 2H), 1.33 (s, 9H). <sup>13</sup>C NMR (150 MHz, CDCl<sub>3</sub>): δ 157.8, 150.4, 139.8, 138.4, 133.4, 127.4, 125.8, 118.3, 115.8, 110.0, 35.2, 30.9. HRMS (ESI) calcd for  $C_{16}H_{20}NO_2S_2$  (M+H)<sup>+</sup> : 322.0930; Found: 322.0931.

**S-(2-Aminophenyl) 4-fluorobenzenesulfonylthioate (4f)**

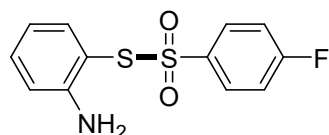

Yellow solid (34.7 mg, 61% yield). Mp: 105.1–107.1 °C. <sup>1</sup>H NMR (600 MHz, CDCl<sub>3</sub>): δ 7.66–7.64 (m, 2H), 7.25–7.22 (m, 1H), 7.13 (d, *J* = 8.4 Hz, 2H), 6.91 (dd, *J* = 7.8, 1.2 Hz, 1H), 6.72 (d, *J* = 7.8 Hz, 1H), 6.59 (t, *J* = 7.2 Hz, 1H), 4.33 (s, 2H). <sup>13</sup>C NMR (150 MHz, CDCl<sub>3</sub>): δ 166.5 (d, *J* = 255.6 Hz), 150.4, 138.8 (d, *J* = 2.9 Hz), 138.4, 133.8, 130.6 (d, *J* =



9.6 Hz), 118.6, 116.2 (d,  $J = 22.7$  Hz), 116.0, 109.6. HRMS (ESI) calcd for  $C_{12}H_{11}FNO_2S_2$  ( $M+H$ )<sup>+</sup> : 284.0210; Found: 284.0206.

***S*-(2-Aminophenyl) 4-chlorobenzenesulfonylthioate (4g)**

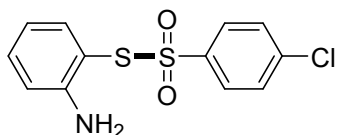

Yellow solid (31.7mg, 53% yield). Mp: 100.3–102.3 °C. <sup>1</sup>H NMR (600 MHz, CDCl<sub>3</sub>): δ 7.58 (d,  $J = 9.0$  Hz, 2H), 7.42 (d,  $J = 8.4$  Hz, 2H), 7.26–7.23 (m, 1H), 6.92 (d,  $J = 7.8$  Hz, 1H), 6.72 (d,  $J = 8.4$  Hz, 1H), 6.61 (t,  $J = 7.8$  Hz, 1H), 4.33 (s, 2H). <sup>13</sup>C NMR (150 MHz, CDCl<sub>3</sub>): δ 150.4, 141.3, 140.4, 138.3, 133.8, 129.1, 129.0, 118.7, 116.0, 109.4. HRMS (ESI) calcd for  $C_{12}H_{11}ClNO_2S_2$  ( $M+H$ )<sup>+</sup> : 299.9914; Found: 299.9911.

***S*-(2-Aminophenyl) 4-bromobenzenesulfonylthioate (4h)**

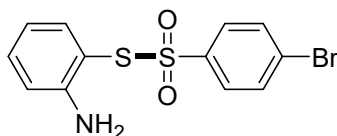

Yellow brown solid (47 mg, 67% yield). Mp: 113–115 °C. <sup>1</sup>H NMR (600 MHz, CDCl<sub>3</sub>): δ 7.58 (d,  $J = 8.4$  Hz, 2H), 7.49 (d,  $J = 8.4$  Hz, 2H), 7.24 (t,  $J = 7.8$  Hz, 1H), 6.92 (d,  $J = 7.8$  Hz, 1H), 6.72 (d,  $J = 7.8$  Hz, 1H), 6.60 (t,  $J = 7.8$  Hz, 1H), 4.38 (s, 2H). <sup>13</sup>C NMR (150 MHz, CDCl<sub>3</sub>): δ 150.4, 141.8, 138.3, 133.8, 132.1, 129.0, 129.0, 118.6, 116.0, 109.3. HRMS (ESI) calcd for  $C_{12}H_{11}BrNO_2S_2$  ( $M+H$ )<sup>+</sup> : 343.9409; Found: 343.9408.

***S*-(2-Aminophenyl) 4-(trifluoromethyl)benzenesulfonylthioate (4i)**

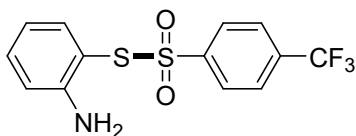

Yellow solid (51 mg, 76% yield). Mp: 98.9–100.9 °C. <sup>1</sup>H NMR (600 MHz, CDCl<sub>3</sub>): δ 7.80 (d,  $J = 7.8$  Hz, 2H), 7.75 (d,  $J = 7.8$  Hz, 2H), 7.29 (d,  $J = 7.8$  Hz, 1H), 6.92 (d,  $J = 8.4$  Hz, 1H), 6.76 (d,  $J = 7.8$  Hz, 1H), 6.62 (t,  $J = 7.2$  Hz, 1H), 3.73 (s, 2H). <sup>13</sup>C NMR (150 MHz, CDCl<sub>3</sub>): δ 150.4, 146.0, 138.3, 135.6 (q,  $J = 33$  Hz), 134.0, 128.2, 126.1 (q,  $J = 3.6$  Hz),

125.8 (q,  $J = 271.5$  Hz), 118.8, 116.1, 109.0. HRMS (ESI) calcd for  $C_{13}H_{10}F_3NNaO_2S_2$  ( $M+Na$ )<sup>+</sup> : 355.9997; Found:355.9996.

**S-(2-Aminophenyl) 4-cyanobenzenesulfonothioate (4j)**

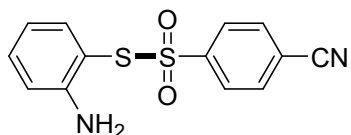

Yellow solid (41.3 mg, 71% yield). Mp: 147.2–149.2 °C. <sup>1</sup>H NMR (600 MHz, CDCl<sub>3</sub>): 7.66 (s, 4H), 7.25–7.22 (m, 1H), 6.89 (t,  $J = 8.4$ , 1.2Hz, 1H), 6.71–6.70 (m, 1H), 6.59–6.57 (m, 1H), 4.28 (s, 2H). <sup>13</sup>C NMR (150 MHz, CDCl<sub>3</sub>): 150.4, 146.3, 138.1, 134.1, 132.6, 128.1, 118.6, 117.1, 117.0, 116.0, 108.4. HRMS (ESI) calcd for  $C_{13}H_{10}N_2O_2S_2$  ( $M+H$ )<sup>+</sup> : 291.0256; Found: 291.0251.

**S-(2-Aminophenyl) 3-chlorobenzenesulfonothioate (4k)**

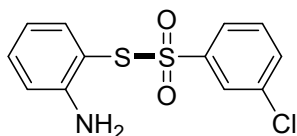

Yellow solid (40.2 mg, 67% yield). Mp: 88–90 °C. <sup>1</sup>H NMR (600 MHz, CDCl<sub>3</sub>): δ 7.57 (d,  $J = 12$  Hz, 2H), 7.53 (d,  $J = 7.8$  Hz, 1H), 7.40 (t,  $J = 7.8$  Hz, 1H), 7.26 (t,  $J = 7.8$  Hz, 1H), 6.93 (d,  $J = 7.8$  Hz, 1H), 6.72 (d,  $J = 8.4$  Hz, 1H), 6.61 (t,  $J = 7.2$  Hz, 1H), 4.20 (s, 2H). <sup>13</sup>C NMR (150 MHz, CDCl<sub>3</sub>): δ 150.3, 144.0, 138.3, 135.0, 133.9, 133.7, 130.1, 127.6, 125.5, 118.6, 116.0, 109.1. HRMS (ESI) calcd for  $C_{12}H_{11}ClNO_2S_2$  ( $M+H$ )<sup>+</sup> : 299.9914; Found: 299.9918.

**S-(2-Aminophenyl) 3-bromobenzenesulfonothioate (4l)**

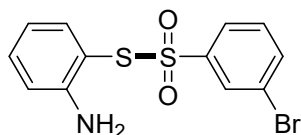

Yellow brown solid (45.4 mg, 66% yield). Mp: 104–106 °C. <sup>1</sup>H NMR (600 MHz, CDCl<sub>3</sub>): δ 7.71–7.69 (m, 2H), 7.57–7.56 (m, 1H), 7.33–7.30 (m, 1H), 7.25–7.23 (m, 1H), 6.93 (dd,  $J = 7.8$ , 1.8 Hz, 1H), 6.72 (dd,  $J = 8.4$ , 1.2 Hz, 1H), 6.61 (td,  $J = 7.8$ , 1.2 Hz, 1H), 4.24 (s,

2H).  $^{13}\text{C}$  NMR (150 MHz,  $\text{CDCl}_3$ ):  $\delta$  150.3, 144.1, 138.3, 136.6, 133.9, 130.4, 130.3, 125.9, 122.7, 118.6, 116.0, 109.0. HRMS (ESI) calcd for  $\text{C}_{12}\text{H}_{11}\text{BrNO}_2\text{S}_2$  ( $\text{M}+\text{H}$ ) $^+$  : 343.9409; Found: 343.9413.

***S*-(2-Aminophenyl) 2-chlorobenzenesulfonylthioate (4m)**

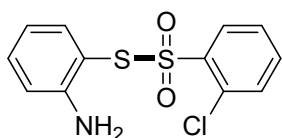

Yellow solid (31.8 mg, 53% yield). Mp: 99–101 °C.  $^1\text{H}$  NMR (600 MHz,  $\text{CDCl}_3$ ):  $\delta$  7.64 (d,  $J = 7.8$  Hz, 1H), 7.58 (d,  $J = 7.8$  Hz, 1H), 7.53 (t,  $J = 7.8$  Hz, 1H), 7.25 (t,  $J = 7.8$  Hz, 1H), 7.19 (t,  $J = 7.8$  Hz, 1H), 6.91 (d,  $J = 7.8$  Hz, 1H), 6.67 (d,  $J = 8.4$  Hz, 1H), 6.52 (t,  $J = 7.2$  Hz, 1H), 3.96 (s, 2H).  $^{13}\text{C}$  NMR (150 MHz,  $\text{CDCl}_3$ ):  $\delta$  150.4, 139.3, 138.3, 134.7, 133.7, 132.4, 132.2, 131.8, 126.6, 118.5, 115.8, 109.4. HRMS (ESI) calcd for  $\text{C}_{12}\text{H}_{11}\text{ClNO}_2\text{S}_2$  ( $\text{M}+\text{H}$ ) $^+$  : 299.9914; Found: 299.9918.

***S*-(2-Aminophenyl) 3,5-difluorobenzenesulfonylthioate (4n)**

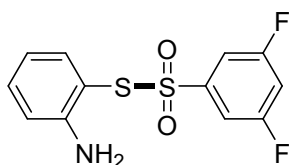

Yellow solid (36.3 mg, 60% yield). Mp: 135.6–137.6 °C.  $^1\text{H}$  NMR (600 MHz,  $\text{CDCl}_3$ ):  $\delta$  7.28 (t,  $J = 7.8$  Hz, 1H), 7.19–7.17 (m, 2H), 7.07–7.04 (m, 1H), 6.97 (d,  $J = 7.8$  Hz, 1H), 6.74 (d,  $J = 8.4$  Hz, 1H), 6.64 (t,  $J = 7.8$  Hz, 1H), 4.33 (s, 2H).  $^{13}\text{C}$  NMR (150 MHz,  $\text{CDCl}_3$ ):  $\delta$  163.2 (dd,  $J = 254.0, 11.1$  Hz), 150.4, 145.4 (t,  $J = 8.4$  Hz), 138.2, 134.2, 118.7, 116.1, 111.3 (dd,  $J = 22.4, 6.6$  Hz), 109.4 (t,  $J = 24.9$  Hz), 108.7. HRMS (ESI) calcd for  $\text{C}_{12}\text{H}_9\text{F}_2\text{NNaO}_2\text{S}_2$  ( $\text{M}+\text{Na}$ ) $^+$  : 323.9935; Found: 323.9935.

***S*-(2-Aminophenyl) 3-chloro-4-fluorobenzenesulfonylthioate (4o)**

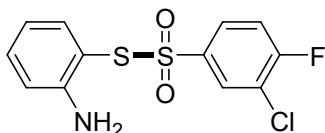

Yellow solid (36.2 mg, 57% yield). Mp: 96–98 °C. <sup>1</sup>H NMR (600 MHz, CDCl<sub>3</sub>): δ 7.65 (d, *J* = 6.6 Hz, 1H), 7.54–7.53 (m, 1H), 7.27 (t, *J* = 7.8 Hz, 1H), 7.21 (t, *J* = 8.4 Hz, 1H), 6.95 (d, *J* = 7.8 Hz, 1H), 6.73 (d, *J* = 7.8 Hz, 1H), 6.63 (t, *J* = 7.8 Hz, 1H), 4.21 (s, 2H). <sup>13</sup>C NMR (150 MHz, CDCl<sub>3</sub>): δ 162.0 (d, *J* = 257.6 Hz), 150.3, 139.4 (d, *J* = 3.8 Hz), 138.3, 134.0, 130.7, 128.1 (d, *J* = 8.7 Hz), 122.3 (d, *J* = 18.8 Hz), 118.7, 117.2 (d, *J* = 22.7 Hz), 116.0, 109.0. HRMS (ESI) calcd for C<sub>12</sub>H<sub>10</sub>ClFNO<sub>2</sub>S<sub>2</sub> (M+H)<sup>+</sup> : 317.9820; Found: 317.9817.

#### **S-(2-Aminophenyl) 5-bromo-2-methoxybenzenesulfonylthioate (4p)**

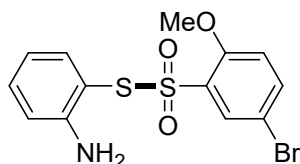

Yellow solid (56.1 mg, 75% yield). Mp: 124–126 °C. <sup>1</sup>H NMR (600 MHz, CDCl<sub>3</sub>): δ 7.65–7.63 (m, 2H), 7.22 (t, *J* = 7.8 Hz, 1H), 6.95–6.93 (m, 2H), 6.72 (d, *J* = 8.4 Hz, 1H), 6.58 (t, *J* = 7.8 Hz, 1H), 4.16 (s, 2H), 3.96 (s, 3H). <sup>13</sup>C NMR (150 MHz, CDCl<sub>3</sub>): δ 156.0, 150.5, 138.3, 138.1, 133.7, 133.0, 131.8, 118.4, 115.9, 114.4, 111.9, 109.9, 56.6. HRMS (ESI) calcd for C<sub>13</sub>H<sub>13</sub>BrNO<sub>3</sub>S<sub>2</sub> (M+H)<sup>+</sup> : 373.9515; Found: 373.9515.

#### **S-(2-Aminophenyl) thiophene-2-sulfonylthioate (4q)**

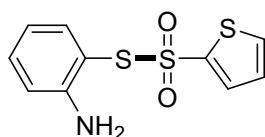

Yellow solid (35.8 mg, 66% yield). Mp: 118–120 °C. <sup>1</sup>H NMR (600 MHz, CDCl<sub>3</sub>): δ 7.67 (d, *J* = 4.8 Hz, 1H), 7.35 (d, *J* = 3.6 Hz, 1H), 7.25 (t, *J* = 7.8 Hz, 1H), 7.02–7.00 (m, 2H), 6.73 (d, *J* = 8.4 Hz, 1H), 6.62 (t, *J* = 7.8 Hz, 1H), 4.10 (s, 2H). <sup>13</sup>C NMR (150 MHz, CDCl<sub>3</sub>): δ 150.4, 143.1, 138.3, 134.2, 134.2, 133.8, 127.3, 118.6, 116.0, 110.0. HRMS (ESI) calcd for C<sub>10</sub>H<sub>10</sub>NO<sub>2</sub>S<sub>3</sub> (M+H)<sup>+</sup> : 271.9868; Found: 271.9866.

#### **S-(2-Aminophenyl) methanesulfonylthioate (4r)**

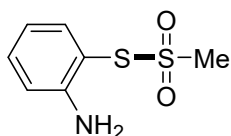

Yellow brown solid (36 mg, 87% yield). Mp: 103.4–105.4 °C. <sup>1</sup>H NMR (600 MHz, CDCl<sub>3</sub>): δ 7.46 (dd, *J* = 7.8, 1.2 Hz, 1H), 7.32–7.29 (m, 1H), 6.81 (d, *J* = 8.4 Hz, 1H), 6.79 (t, *J* = 7.8 Hz, 1H), 4.57 (s, 2H), 3.23 (s, 3H). <sup>13</sup>C NMR (150 MHz, CDCl<sub>3</sub>): δ 150.1, 138.2, 133.9, 119.1, 116.3, 109.8, 47.7. HRMS (ESI) calcd for C<sub>7</sub>H<sub>10</sub>NO<sub>2</sub>S<sub>2</sub> (M+H)<sup>+</sup> : 204.0147; Found: 204.0150.

#### S-(2-Aminophenyl) ethanesulfonyl ethyl sulfonamide (4s)

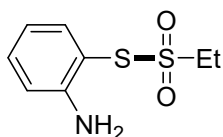

Yellow brown solid (32 mg, 74% yield). Mp: 83–85 °C. <sup>1</sup>H NMR (600 MHz, CDCl<sub>3</sub>): δ 7.42 (d, *J* = 7.8 Hz, 1H), 7.29 (t, *J* = 7.8 Hz, 1H), 6.79 (d, *J* = 8.4 Hz, 1H), 6.76 (t, *J* = 7.8 Hz, 1H), 4.43 (s, 2H), 3.30 (q, *J* = 7.2 Hz, 2H), 1.48 (t, *J* = 7.2 Hz, 3H). <sup>13</sup>C NMR (150 MHz, CDCl<sub>3</sub>): δ 150.3, 138.1, 133.6, 118.9, 116.3, 109.7, 54.0, 8.1. HRMS (ESI) calcd for C<sub>8</sub>H<sub>12</sub>NO<sub>2</sub>S<sub>2</sub> (M+H)<sup>+</sup> : 218.0304; Found: 218.0303.

#### 2-Phenylbenzo[d]thiazole (5a)

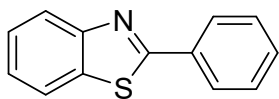

White solid (35.1 mg, 83% yield). Mp: 115.1–117.1 °C (lit.<sup>5</sup> 112–114 °C). <sup>1</sup>H NMR (600 MHz, CDCl<sub>3</sub>): δ 8.11 (d, *J* = 7.2 Hz, 3H), 7.90 (d, *J* = 8.4 Hz, 1H), 7.51–7.49 (m, 4H), 7.40 (t, *J* = 7.8 Hz, 1H). <sup>13</sup>C NMR (150 MHz, CDCl<sub>3</sub>): δ 168.0, 154.1, 135.0, 133.5, 130.9, 129.0, 127.5, 126.2, 125.1, 123.1, 121.5. HRMS (ESI) calcd for C<sub>13</sub>H<sub>10</sub>NS (M+H)<sup>+</sup> : 212.0528; Found: 212.0529.

#### 2-(4-Methoxyphenyl)benzo[d]thiazole (5b)

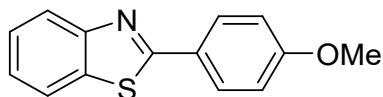

White solid (41 mg, 85% yield). Mp: 103–105 °C (lit.<sup>6</sup> 102 °C). <sup>1</sup>H NMR (600 MHz, CDCl<sub>3</sub>): δ 8.05–8.02 (m, 3H), 7.87 (d, *J* = 7.8 Hz, 1H), 7.48 (t, *J* = 7.2 Hz, 1H), 7.36 (t, *J* = 7.8 Hz, 1H), 6.99 (d, *J* = 8.4 Hz, 2H), 3.86 (s, 3H). <sup>13</sup>C NMR (150 MHz, CDCl<sub>3</sub>): δ 167.8, 161.8, 154.2, 134.8, 129.0, 126.3, 126.1, 124.7, 122.7, 121.4, 114.3, 55.4. HRMS (ESI) calcd for C<sub>14</sub>H<sub>11</sub>NNaOS (M+Na)<sup>+</sup> : 264.0454; Found: 264.0453.

### 2-(*p*-Tolyl)benzo[d]thiazole (5c)

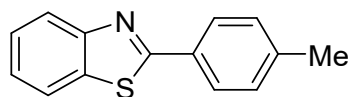

White solid (30.2 mg, 67% yield). Mp: 80–82 °C (lit.<sup>7</sup> 83–84 °C). <sup>1</sup>H NMR (600 MHz, CDCl<sub>3</sub>): δ 8.08 (d, *J* = 7.8 Hz, 1H), 8.00 (d, *J* = 7.8 Hz, 2H), 7.90 (d, *J* = 7.8 Hz, 1H), 7.50 (t, *J* = 7.2 Hz, 1H), 7.38 (t, *J* = 7.8 Hz, 1H), 7.30 (d, *J* = 7.8 Hz, 2H), 2.42 (s, 3H). <sup>13</sup>C NMR (150 MHz, CDCl<sub>3</sub>): δ 168.2, 154.1, 141.4, 134.9, 130.9, 129.7, 127.4, 126.2, 124.9, 123.0, 121.5, 21.5. HRMS (ESI) calcd for C<sub>14</sub>H<sub>12</sub>NS (M+H)<sup>+</sup> : 226.0685; Found: 226.0686.

### 2-(*m*-Tolyl)benzo[d]thiazole (5d)

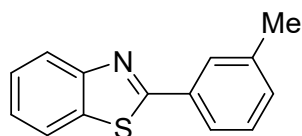

White solid (34.8 mg, 77% yield). Mp: 70–72 °C (lit.<sup>8</sup> 67–68 °C). <sup>1</sup>H NMR (600 MHz, CDCl<sub>3</sub>): δ 8.11 (d, *J* = 7.8 Hz, 1H), 7.96 (s, 1H), 7.90 (t, *J* = 7.8 Hz, 2H), 7.51 (t, *J* = 7.8 Hz, 1H), 7.39 (t, *J* = 7.8 Hz, 2H), 7.31 (d, *J* = 7.8 Hz, 1H), 2.46 (s, 3H). <sup>13</sup>C NMR (150 MHz, CDCl<sub>3</sub>): δ 168.3, 154.0, 138.8, 134.9, 133.4, 131.7, 128.8, 127.9, 126.2, 125.0, 124.8, 123.1, 121.5, 21.30. HRMS (ESI) calcd for C<sub>14</sub>H<sub>11</sub>NNaS (M+Na)<sup>+</sup> : 248.0504; Found: 248.0505.

### 2-(4-Ethylphenyl)benzo[d]thiazole (5e)

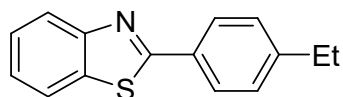

White solid (30 mg, 62% yield). Mp: 84–86 °C (lit.<sup>8</sup> 85–87 °C). <sup>1</sup>H NMR (600 MHz, CDCl<sub>3</sub>): δ 8.08 (d, *J* = 7.8 Hz, 1H), 8.03 (d, *J* = 7.8 Hz, 2H), 7.90 (d, *J* = 7.8 Hz, 1H), 7.50 (t, *J* = 7.8 Hz, 1H), 7.39 (t, *J* = 7.8 Hz, 1H), 7.33 (d, *J* = 7.8 Hz, 2H), 2.75 (q, *J* = 7.2 Hz, 2H), 1.31 (t, *J* = 7.8 Hz, 3H). <sup>13</sup>C NMR (150 MHz, CDCl<sub>3</sub>): δ 168.2, 154.1, 147.7, 134.9, 131.1, 128.5, 127.6, 126.2, 125.0, 123.0, 121.5, 28.8, 15.3. HRMS (ESI) calcd for C<sub>15</sub>H<sub>14</sub>NS (M+H)<sup>+</sup> : 240.0841; Found: 240.0845.

### 2-(4-(*tert*-Butyl)phenyl)benzo[d]thiazole (5f)

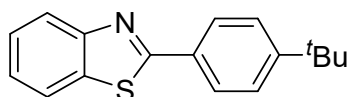

White solid (43 mg, 80% yield). Mp: 108–110 °C (lit.<sup>8</sup> 107–108 °C). <sup>1</sup>H NMR (600 MHz, CDCl<sub>3</sub>): δ 8.10 (d, *J* = 8.4 Hz, 1H), 8.05 (d, *J* = 7.8 Hz, 2H), 7.90 (d, *J* = 7.8 Hz, 1H), 7.53 (d, *J* = 8.4 Hz, 2H), 7.51 (t, *J* = 7.8 Hz, 1H), 7.39 (t, *J* = 7.8 Hz, 1H), 1.39 (s, 9H). <sup>13</sup>C NMR (150 MHz, CDCl<sub>3</sub>): δ 168.1, 154.5, 154.2, 134.9, 130.9, 127.3, 126.2, 125.9, 124.9, 123.0, 121.5, 34.9, 31.1. HRMS (ESI) calcd for C<sub>17</sub>H<sub>18</sub>NS (M+H)<sup>+</sup> : 268.1154; Found: 268.1151.

### 2-(3-Fluorophenyl)benzo[d]thiazole (5g)

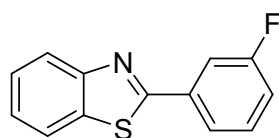

White solid (37.2 mg, 81% yield). Mp: 110–112 °C (lit.<sup>9</sup> 116–117 °C). <sup>1</sup>H NMR (600 MHz, CDCl<sub>3</sub>): δ 8.09 (d, *J* = 7.8 Hz, 1H), 7.88 (d, *J* = 7.8 Hz, 1H), 7.84–7.82 (m, 2H), 7.51 (td, *J* = 7.8, 1.2 Hz, 1H), 7.44–7.37 (m, 2H), 7.19–7.15 (m, 1H). <sup>13</sup>C NMR (150 MHz, CDCl<sub>3</sub>): δ 166.3 (d, *J* = 2.9 Hz), 163.8 (d, *J* = 245.9 Hz), 153.9, 135.6 (d, *J* = 7.8 Hz), 135.0, 130.5 (d, *J* = 7.8 Hz), 126.4, 125.4, 123.4, 123.2 (d, *J* = 2.6 Hz), 121.6, 117.8 (d, *J* = 21.0 Hz), 114.3 (d, *J* = 23.6 Hz). HRMS (ESI) calcd for C<sub>13</sub>H<sub>9</sub>FNS (M+H)<sup>+</sup> : 230.0434; Found: 230.0433.

### 2-(4-Chlorophenyl)benzo[d]thiazole (5h)

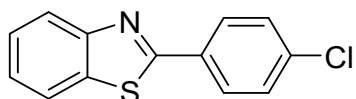

White solid (44 mg, 90% yield). Mp: 128–130 °C (lit.<sup>5</sup> 122–123 °C). <sup>1</sup>H NMR (600 MHz, CDCl<sub>3</sub>): δ 8.07 (d, *J* = 7.8 Hz, 1H), 7.99 (d, *J* = 7.8 Hz, 2H), 7.86 (d, *J* = 7.8 Hz, 1H), 7.50 (t, *J* = 7.8 Hz, 1H), 7.43 (d, *J* = 7.8 Hz, 2H), 7.38 (t, *J* = 7.8 Hz, 1H). <sup>13</sup>C NMR (150 MHz, CDCl<sub>3</sub>): δ 166.5, 153.9, 136.9, 134.9, 132.0, 129.1, 128.6, 126.4, 125.3, 123.2, 121.5. HRMS (ESI) calcd for C<sub>13</sub>H<sub>9</sub>ClNS (M+H)<sup>+</sup> : 246.0139; Found: 246.0135.

### 2-(3-Chlorophenyl)benzo[d]thiazole (5i)

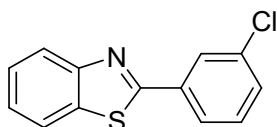

White solid (40.3 mg, 82% yield). Mp: 94–96 °C (lit.<sup>8</sup> 107–108 °C). <sup>1</sup>H NMR (600 MHz, CDCl<sub>3</sub>): δ 8.10 (s, 1H), 8.08 (d, *J* = 7.8 Hz, 1H), 7.91 (d, *J* = 7.8 Hz, 1H), 7.87 (d, *J* = 8.4 Hz, 1H), 7.50 (t, *J* = 7.8 Hz, 1H), 7.43 (d, *J* = 7.8 Hz, 1H), 7.39–7.36 (m, 2H). <sup>13</sup>C NMR (150 MHz, CDCl<sub>3</sub>): δ 166.1, 153.8, 135.1, 135.0, 135.0, 130.7, 130.1, 127.2, 126.4, 125.6, 125.4, 123.3, 121.6. HRMS (ESI) calcd for C<sub>13</sub>H<sub>9</sub>ClNS (M+H)<sup>+</sup> : 246.0139; Found: 246.0141.

### 2-(4-Bromophenyl)benzo[d]thiazole (5j)

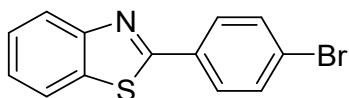

White solid (43.5 mg, 75% yield). Mp: 125.3–127.3 °C (lit.<sup>7</sup> 128–129 °C). <sup>1</sup>H NMR (600 MHz, CDCl<sub>3</sub>): δ 8.07 (d, *J* = 8.4 Hz, 1H), 7.95 (d, *J* = 8.4 Hz, 2H), 7.89 (d, *J* = 8.4 Hz, 1H), 7.62 (d, *J* = 8.4 Hz, 2H), 7.51 (t, *J* = 7.8 Hz, 1H), 7.41 (t, *J* = 7.8 Hz, 1H). <sup>13</sup>C NMR (150 MHz, CDCl<sub>3</sub>): δ 166.6, 154.0, 135.0, 132.5, 132.2, 128.8, 126.5, 125.4, 125.4, 123.3, 121.6. HRMS (ESI) calcd for C<sub>13</sub>H<sub>9</sub>BrNS (M+H)<sup>+</sup> : 289.9634; Found: 289.9630.

### 2-(3-Bromophenyl)benzo[d]thiazole (5k)



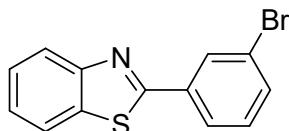

White solid (47.6 mg, 82% yield). Mp: 85–87 °C (lit.<sup>10</sup> 84–86 °C). <sup>1</sup>H NMR (600 MHz, CDCl<sub>3</sub>): δ 8.25 (s, 1H), 8.08 (d, *J* = 8.4 Hz, 1H), 7.94 (d, *J* = 7.8 Hz, 1H), 7.86 (d, *J* = 7.8 Hz, 1H), 7.58 (d, *J* = 7.8 Hz, 1H), 7.50 (t, *J* = 7.8 Hz, 1H), 7.39 (t, *J* = 7.8 Hz, 1H), 7.31 (t, *J* = 7.8 Hz, 1H). <sup>13</sup>C NMR (150 MHz, CDCl<sub>3</sub>): δ 165.9, 153.8, 135.3, 134.9, 133.6, 130.3, 130.1, 126.4, 126.0, 125.4, 123.3, 123.1, 121.5. HRMS (ESI) calcd for C<sub>13</sub>H<sub>9</sub>BrNS (M+H)<sup>+</sup>: 289.9634; Found: 289.9636.

#### 4-(Benzo[d]thiazol-2-yl)benzotrile (5l)

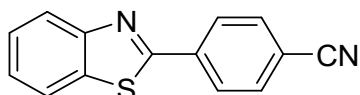

White solid (38.3 mg, 81% yield). Mp: 175–177 °C (lit.<sup>5</sup> 176 °C). <sup>1</sup>H NMR (600 MHz, CDCl<sub>3</sub>): δ 8.16 (d, *J* = 7.8 Hz, 2H), 8.10 (d, *J* = 7.8 Hz, 1H), 7.92 (d, *J* = 7.8 Hz, 1H), 7.75 (d, *J* = 7.8 Hz, 2H), 7.54 (t, *J* = 7.2 Hz, 1H), 7.45 (t, *J* = 7.8 Hz, 1H). <sup>13</sup>C NMR (150 MHz, CDCl<sub>3</sub>): δ 165.2, 153.9, 137.3, 135.2, 132.7, 127.8, 126.8, 126.0, 123.7, 121.7, 118.2, 114.0. HRMS (ESI) calcd for C<sub>14</sub>H<sub>9</sub>N<sub>2</sub>S (M+H)<sup>+</sup>: 237.0481; Found: 237.0483.

#### 3-(Benzo[d]thiazol-2-yl)benzotrile (5m)

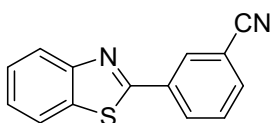

White solid (33 mg, 70% yield). Mp: 168–170 °C (lit.<sup>8</sup> 156–158 °C). <sup>1</sup>H NMR (600 MHz, CDCl<sub>3</sub>): δ 8.38 (t, *J* = 1.2 Hz, 1H), 8.28–8.26 (m, 1H), 8.09 (d, *J* = 7.8 Hz, 1H), 7.93 (dd, *J* = 8.4, 0.6 Hz, 1H), 7.75–7.73 (m, 1H), 7.61 (t, *J* = 7.8 Hz, 1H), 7.54–7.51 (m, 1H), 7.45 (td, *J* = 7.8, 1.2 Hz, 1H). <sup>13</sup>C NMR (150 MHz, CDCl<sub>3</sub>): δ 165.0, 153.8, 135.0, 134.7, 133.8, 131.4, 130.8, 129.8, 126.7, 125.9, 123.6, 121.7, 118.0, 113.4. HRMS (ESI) calcd for C<sub>14</sub>H<sub>9</sub>N<sub>2</sub>S (M+H)<sup>+</sup>: 237.0481; Found: 237.0485.

### 2-(4-(Trifluoromethyl)phenyl)benzo[d]thiazole (5n)

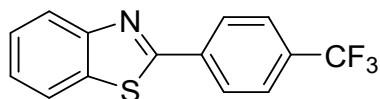

White solid (41 mg, 73% yield). Mp: 157.9–159.9 °C (lit.<sup>8</sup> 160–161 °C). <sup>1</sup>H NMR (600 MHz, CDCl<sub>3</sub>): 8.20 (d, *J* = 7.8 Hz, 2H), 8.11 (d, *J* = 7.8 Hz, 1H), 7.92 (d, *J* = 7.8 Hz, 1H), 7.75 (d, *J* = 7.8 Hz, 2H), 7.54 (t, *J* = 7.2 Hz, 1H), 7.44 (t, *J* = 7.8 Hz, 1H). <sup>13</sup>C NMR (150 MHz, CDCl<sub>3</sub>): δ 166.0, 154.0, 136.7, 135.2, 132.7 (q, *J* = 32.6 Hz), 127.7, 126.6, 126.5 (q, *J* = 270.9 Hz), 126.0 (q, *J* = 3.6 Hz), 125.8, 123.6, 121.7. HRMS (ESI) calcd for C<sub>14</sub>H<sub>9</sub>F<sub>3</sub>NS (M+H)<sup>+</sup> : 280.0402; Found: 280.0406.

### 2-(2-Fluorophenyl)benzo[d]thiazole (5o)

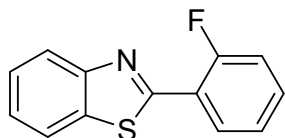

White solid (39 mg, 85% yield). Mp: 80–82 °C (lit.<sup>11</sup> 82 °C). <sup>1</sup>H NMR (600 MHz, CDCl<sub>3</sub>): δ 8.44 (t, *J* = 7.8 Hz, 1H), 8.14 (d, *J* = 8.4 Hz, 1H), 7.94 (d, *J* = 7.8 Hz, 1H), 7.53 (t, *J* = 7.8 Hz, 1H), 7.46 (q, *J* = 7.2 Hz, 1H), 7.42 (t, *J* = 7.8 Hz, 1H), 7.31 (t, *J* = 7.2 Hz, 1H), 7.24–7.21 (m, 1H). <sup>13</sup>C NMR (150 MHz, CDCl<sub>3</sub>): δ 161.3 (d, *J* = 251.7 Hz), 161.0 (d, *J* = 5.9 Hz), 159.6, 152.4, 135.7 (d, *J* = 7.8 Hz), 132.1 (d, *J* = 8.6 Hz), 129.6 (d, *J* = 2.0 Hz), 126.2, 125.2, 124.6 (d, *J* = 3.3 Hz), 123.2, 121.4 (d, *J* = 12.3 Hz), 116.3 (d, *J* = 21.8 Hz). HRMS (ESI) calcd for C<sub>13</sub>H<sub>9</sub>FNS (M+H)<sup>+</sup> : 230.0434; Found: 230.0437.

### 2-(2-Bromophenyl)benzo[d]thiazole (5p)

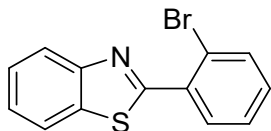

White solid (52 mg, 90% yield). Mp: 68–70 °C (lit.<sup>12</sup> 66–68 °C). <sup>1</sup>H NMR (600 MHz, CDCl<sub>3</sub>): δ 8.16 (d, *J* = 7.8 Hz, 1H), 8.01 (d, *J* = 7.8 Hz, 1H), 7.96 (d, *J* = 7.8 Hz, 1H), 7.75 (t, *J* = 7.8 Hz, 1H), 7.55 (t, *J* = 7.8 Hz, 1H), 7.45–7.43 (m, 2H), 7.34 (t, *J* = 7.2 Hz, 1H). <sup>13</sup>C NMR (150 MHz, CDCl<sub>3</sub>): δ 165.6, 152.7, 136.1, 134.4, 134.0, 132.1, 131.2, 127.5, 126.3, 125.4, 123.5, 122.0, 121.4. HRMS (ESI) calcd for C<sub>13</sub>H<sub>9</sub>BrNS (M+H)<sup>+</sup> : 289.9634; Found: 289.9632.

### 2-(3,5-dimethoxyphenyl)benzo[d]thiazole (5q)

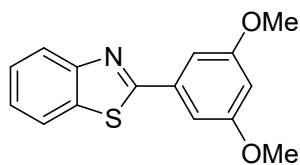

White solid (38 mg, 70% yield). Mp: 135–137 °C (lit.<sup>13</sup> 137–138 °C). <sup>1</sup>H NMR (600 MHz, CDCl<sub>3</sub>): δ 8.07 (d, *J* = 8.4 Hz, 1H), 7.87 (d, *J* = 8.4 Hz, 1H), 7.48 (td, *J* = 7.8, 1.2 Hz, 1H), 7.37–7.34 (m, 1H), 7.24 (d, *J* = 1.8 Hz, 2H), 6.58 (t, *J* = 2.4 Hz, 1H), 3.86 (s, 6H). <sup>13</sup>C NMR (150 MHz, CDCl<sub>3</sub>): δ 167.9, 161.0, 153.9, 135.3, 135.0, 126.2, 125.2, 123.2, 121.5, 105.4, 103.3, 55.5. HRMS (ESI) calcd for C<sub>15</sub>H<sub>14</sub>NO<sub>2</sub>S (M+H)<sup>+</sup> : 272.0740; Found: 272.0744.

### 2-(3,5-Dimethylphenyl)benzo[d]thiazole (5r)

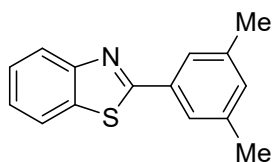

White solid (38 mg, 79% yield). Mp: 73–75 °C (lit.<sup>7</sup> 74–76 °C). <sup>1</sup>H NMR (600 MHz, CDCl<sub>3</sub>): δ 8.08 (d, *J* = 8.4 Hz, 1H), 7.91 (d, *J* = 7.8 Hz, 1H), 7.72 (s, 2H), 7.50 (t, *J* = 7.8 Hz, 1H), 7.40 (t, *J* = 7.8 Hz, 1H), 7.14 (s, 1H), 2.42 (s, 6H). <sup>13</sup>C NMR (150 MHz, CDCl<sub>3</sub>): δ 168.6, 154.1, 138.7, 135.0, 133.4, 132.8, 126.2, 125.3, 125.0, 123.1, 121.6, 21.2. HRMS (ESI) calcd for C<sub>15</sub>H<sub>14</sub>NS (M+H)<sup>+</sup> : 240.0841; Found: 240.0840.

## 6. $^1\text{H}$ NMR and $^{13}\text{C}$ NMR spectra of products

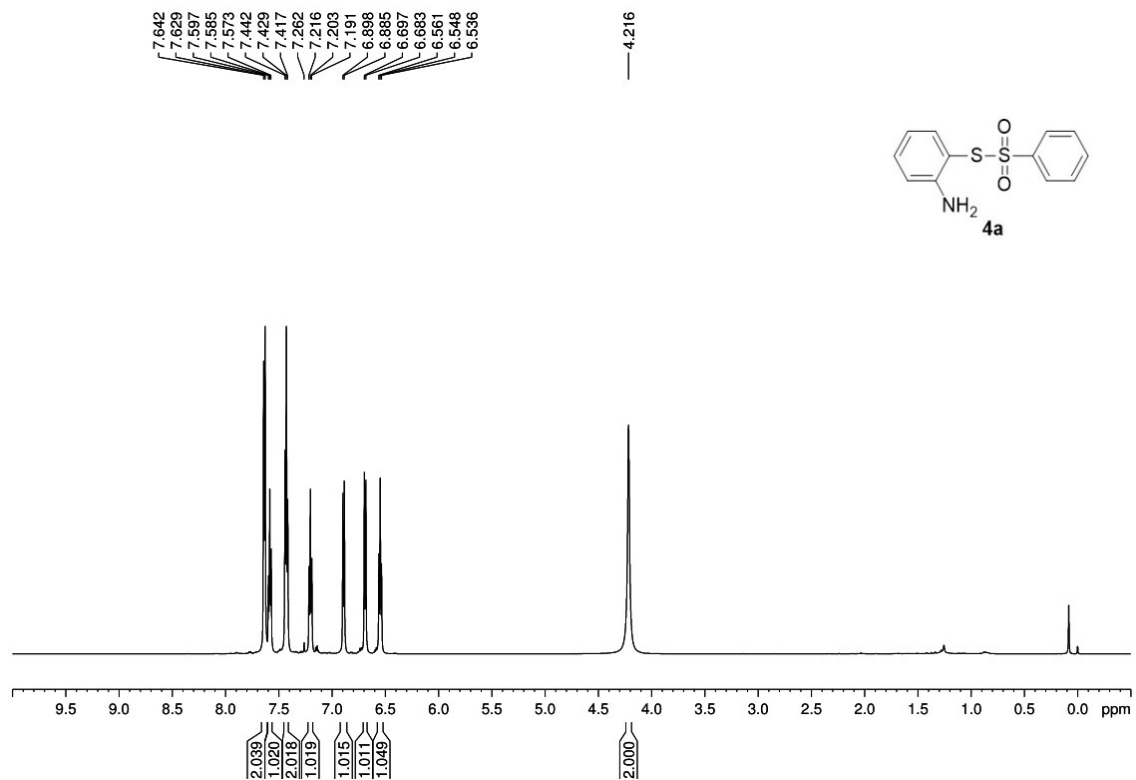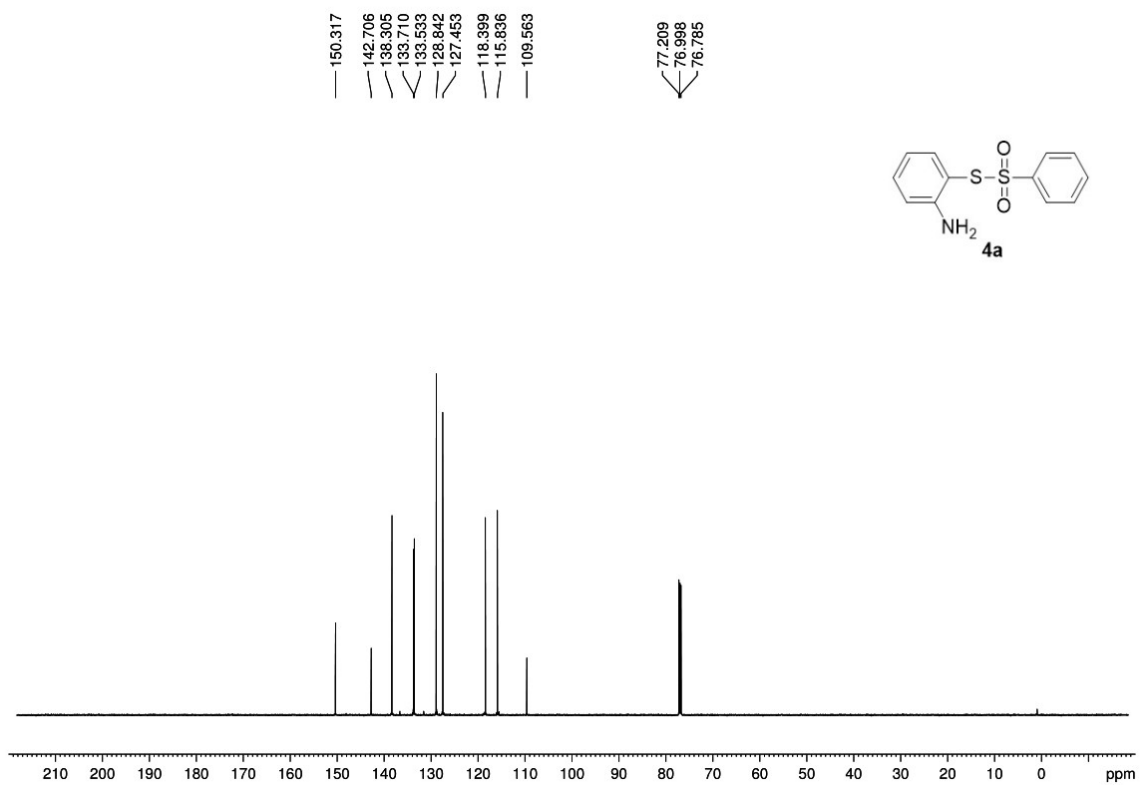

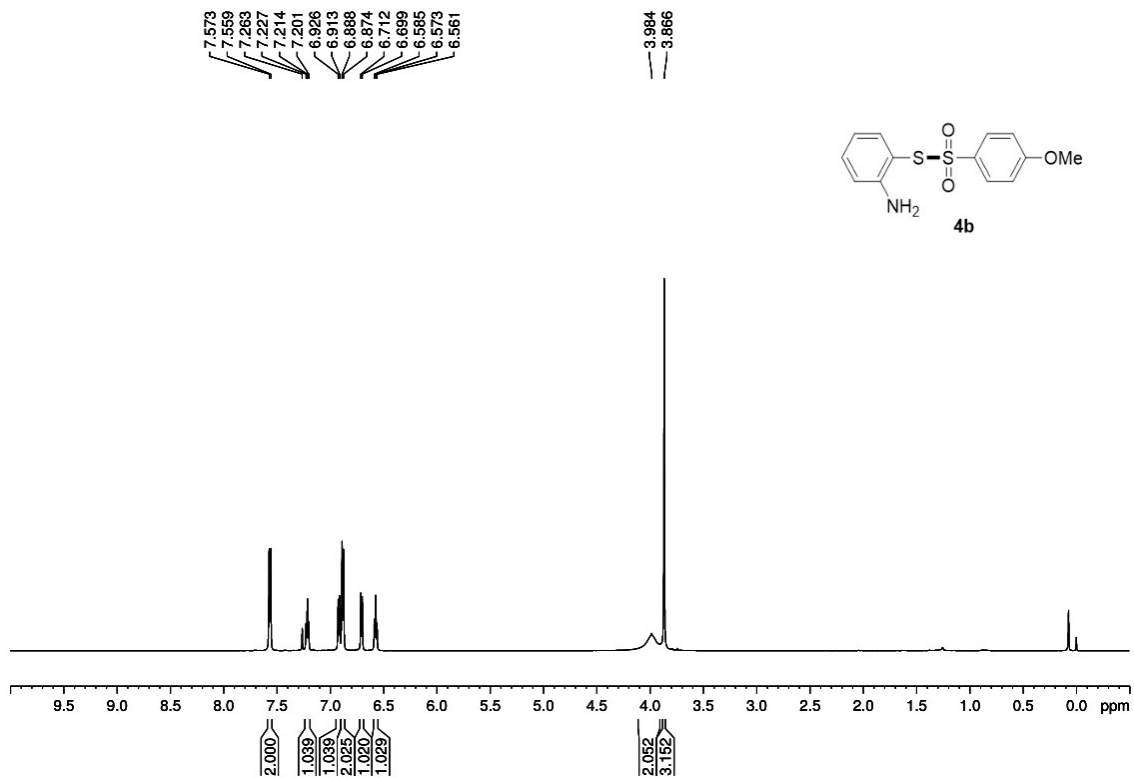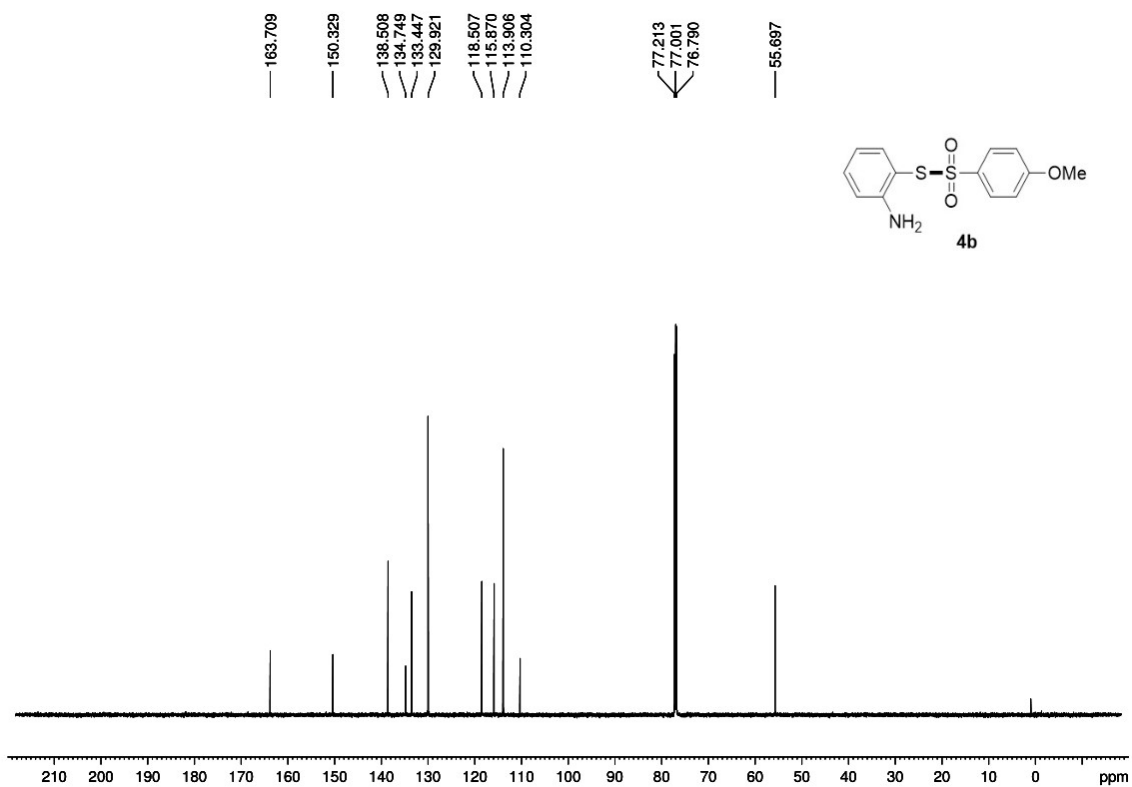

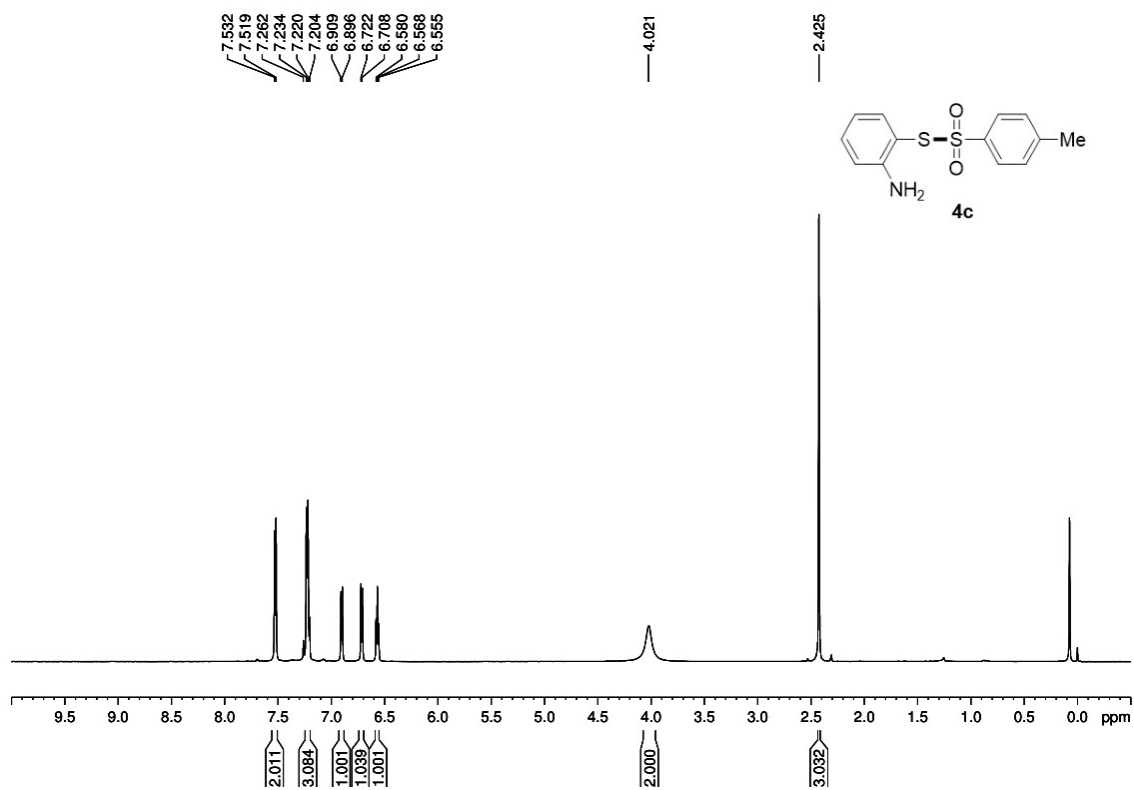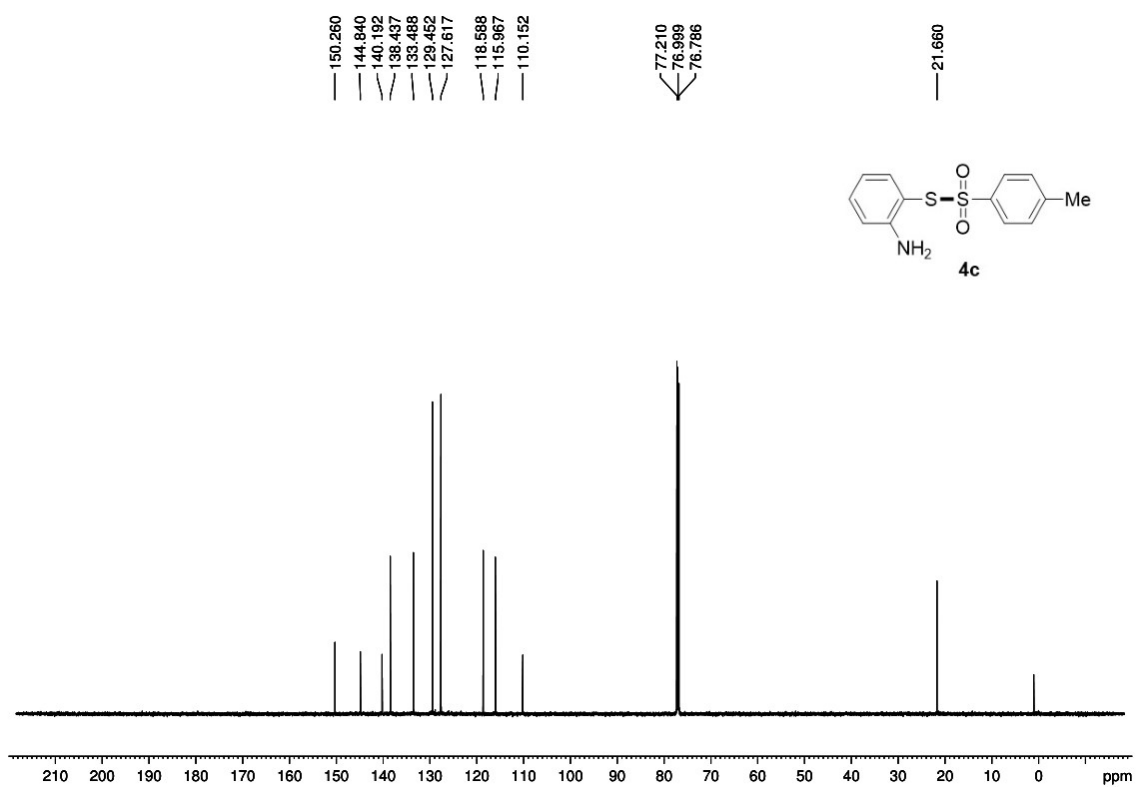

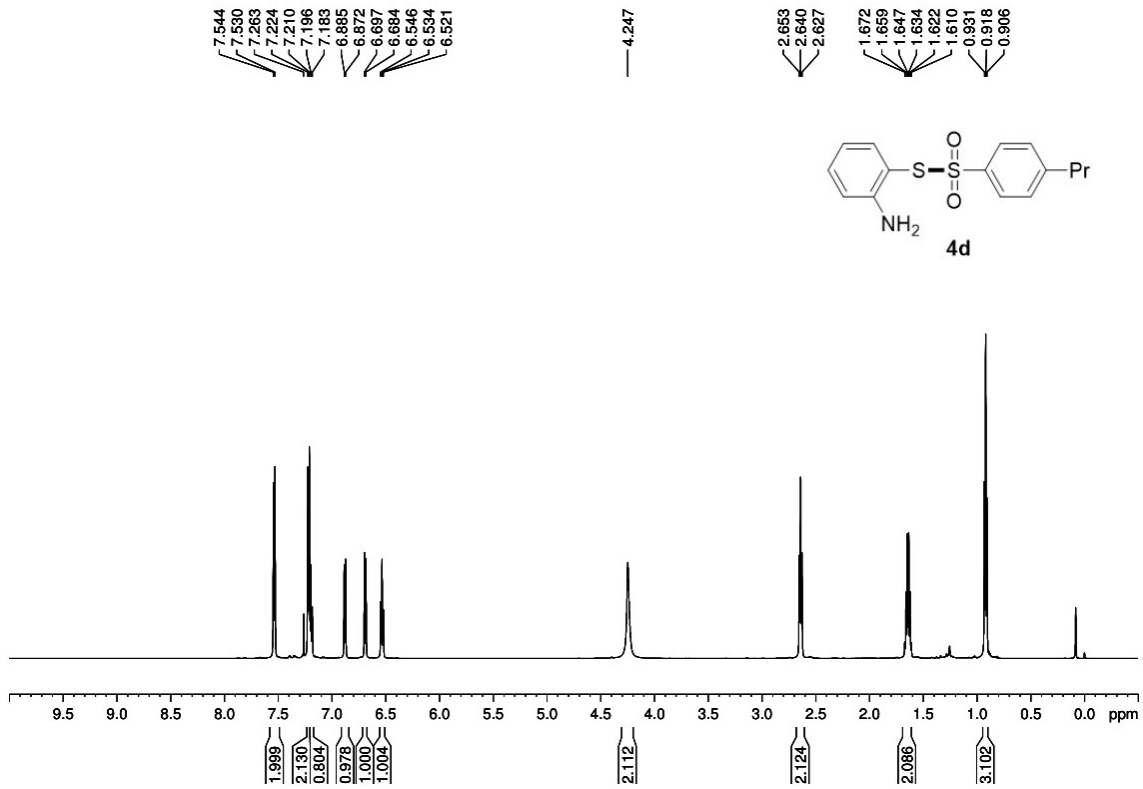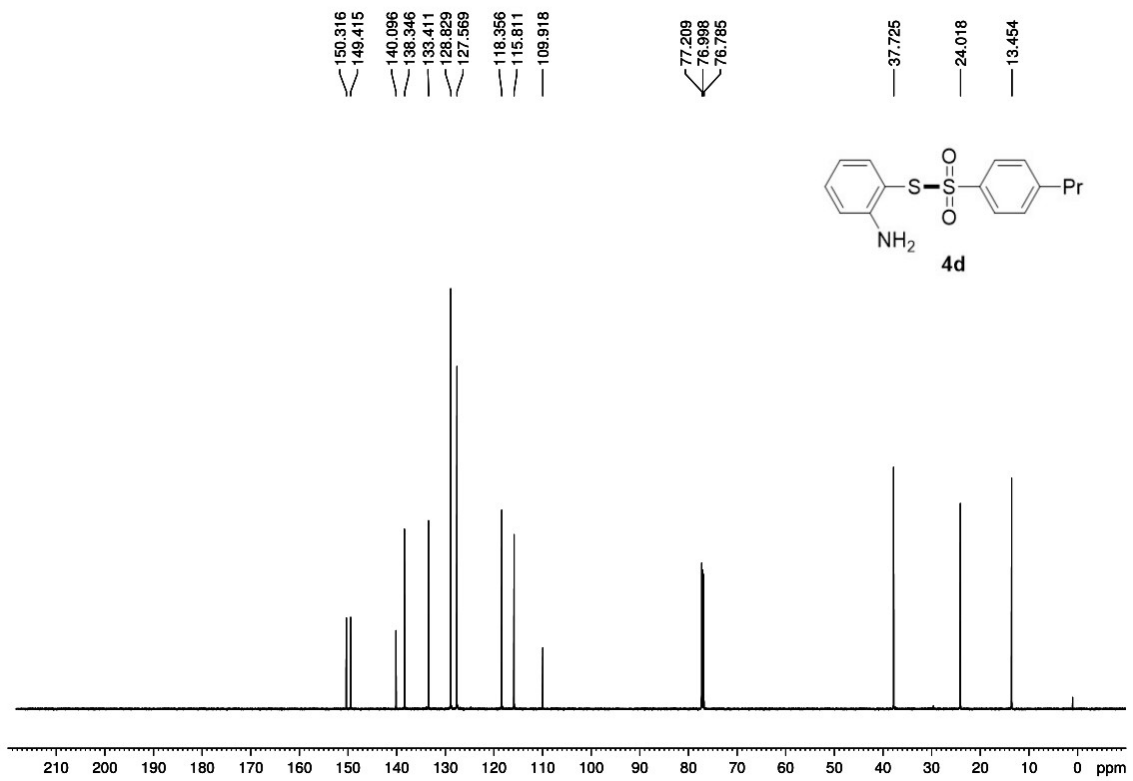

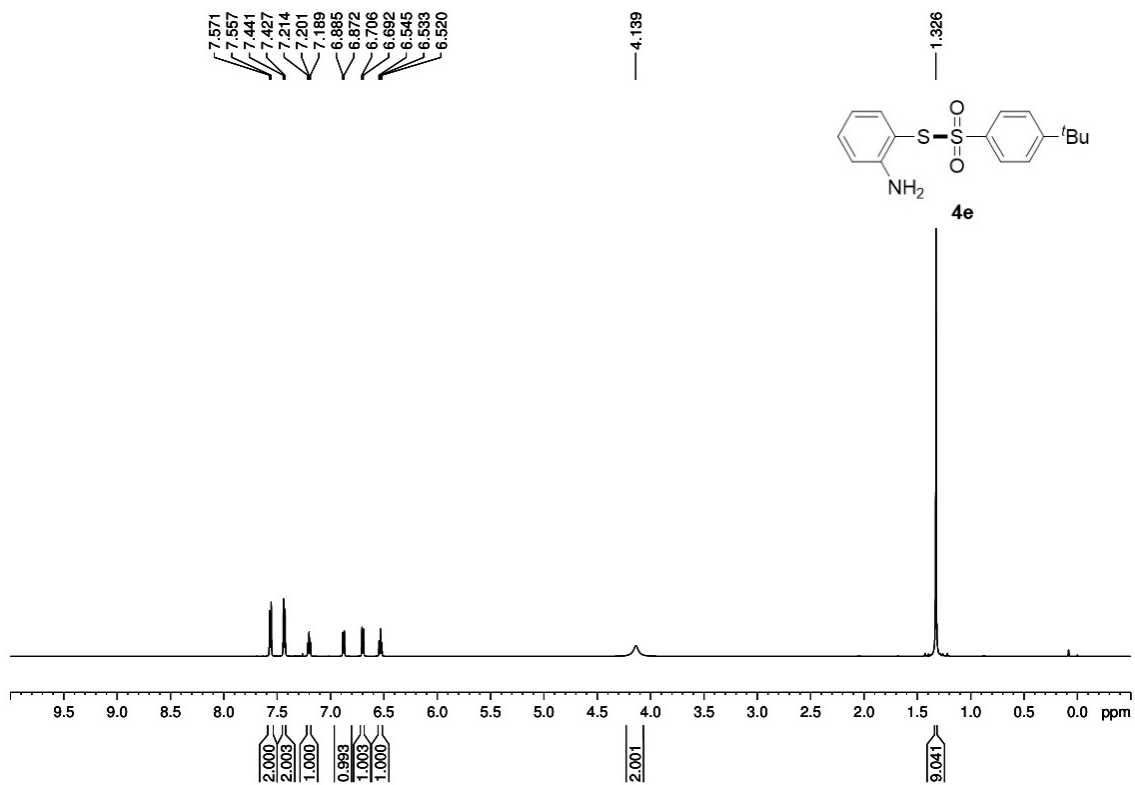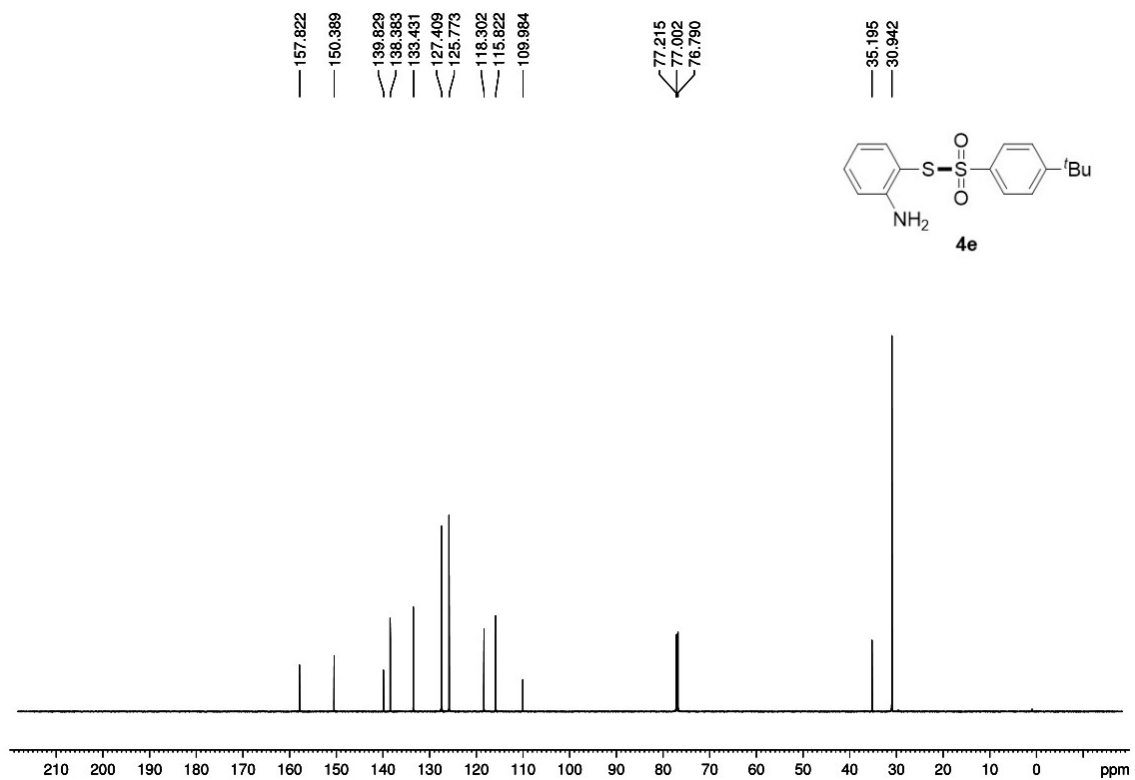



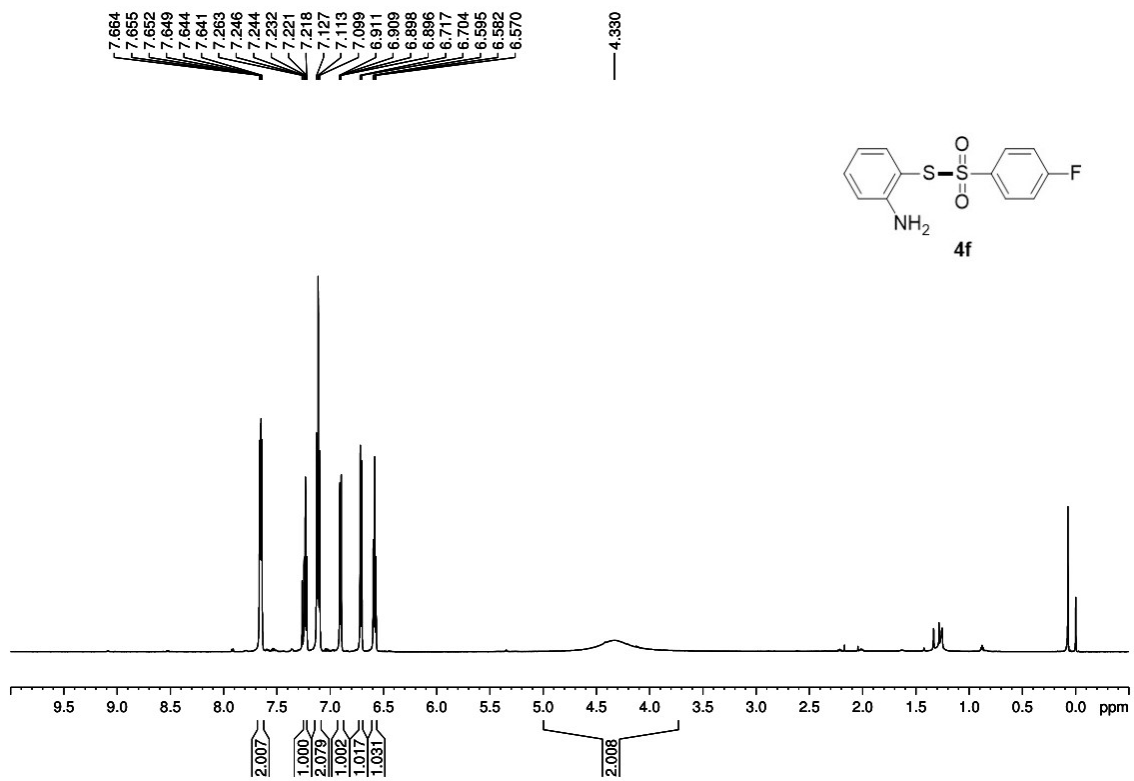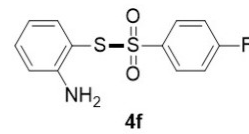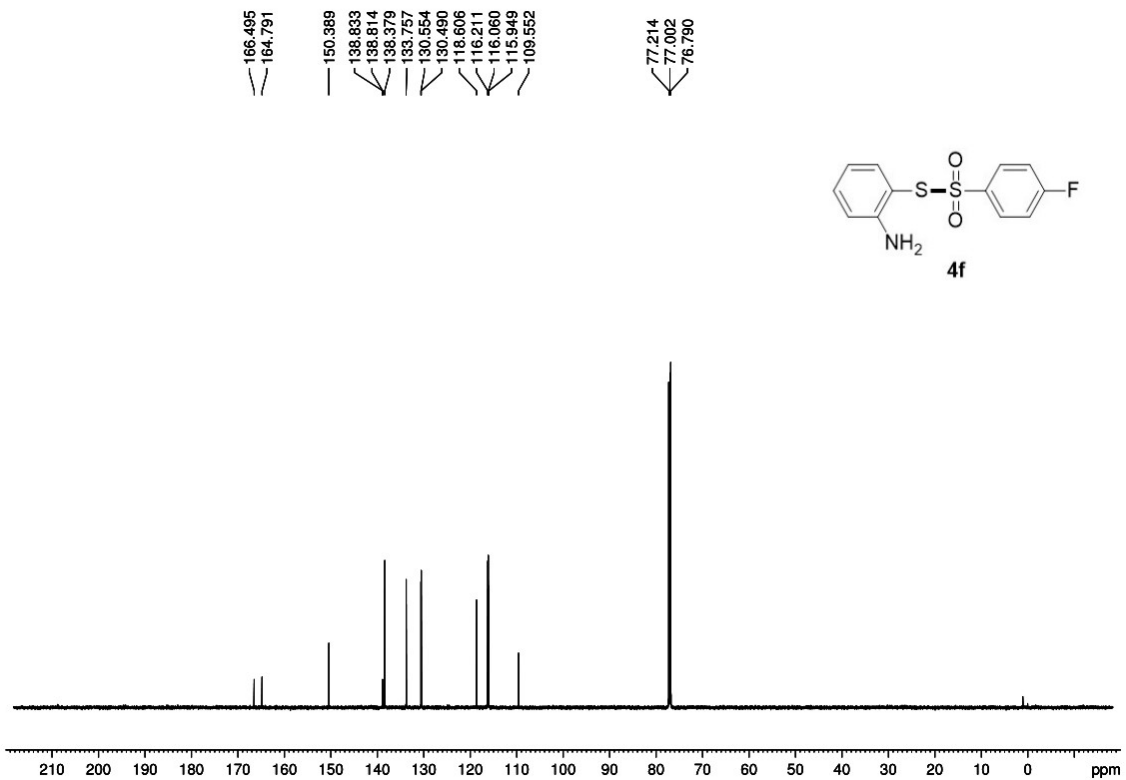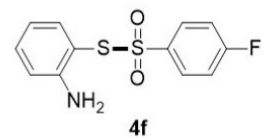

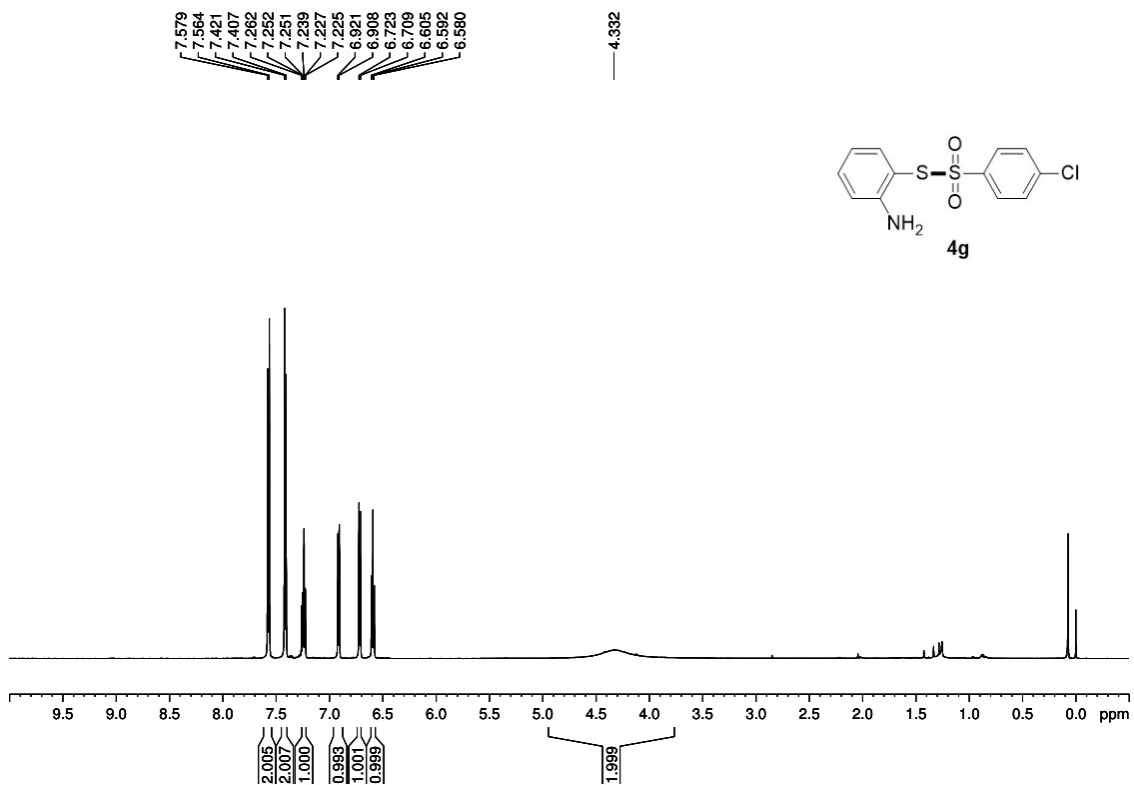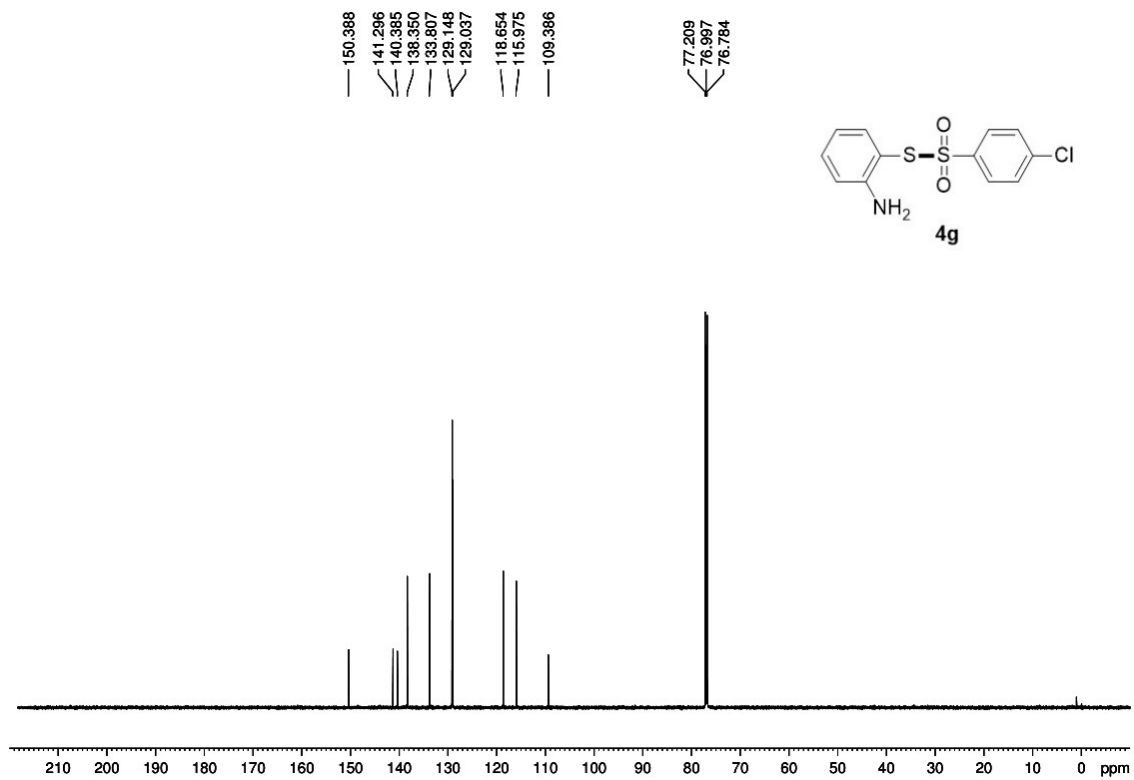

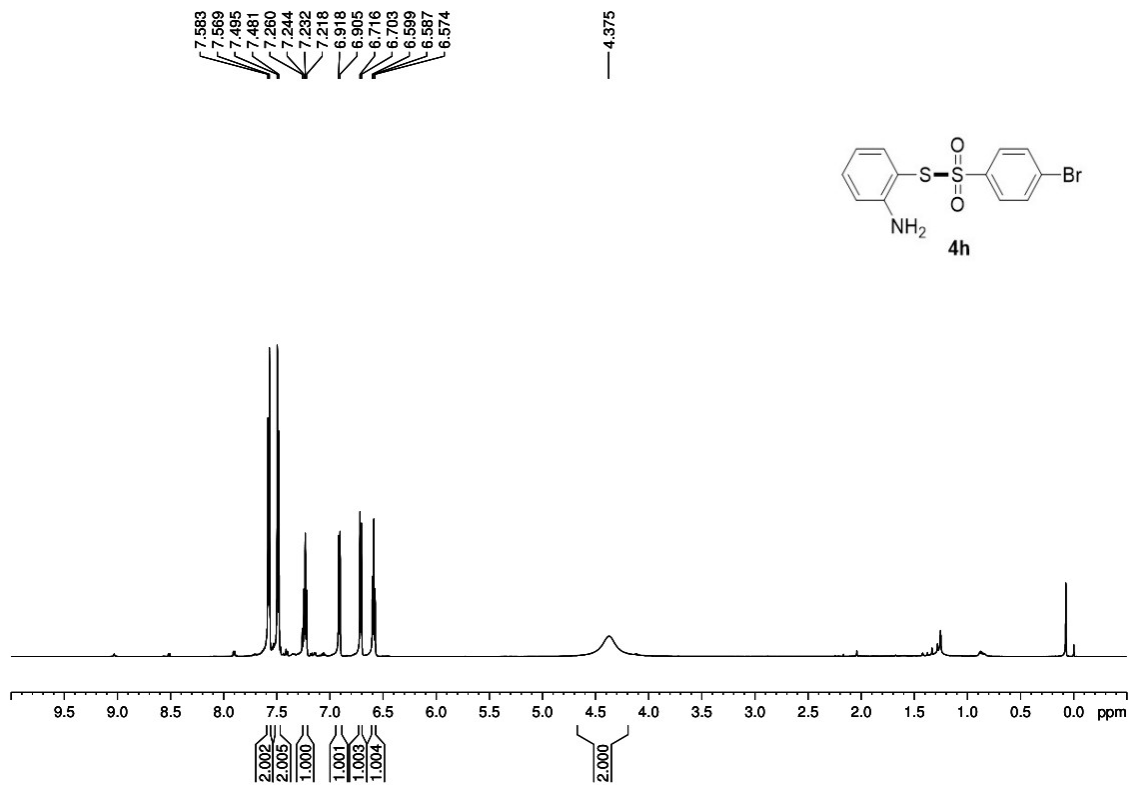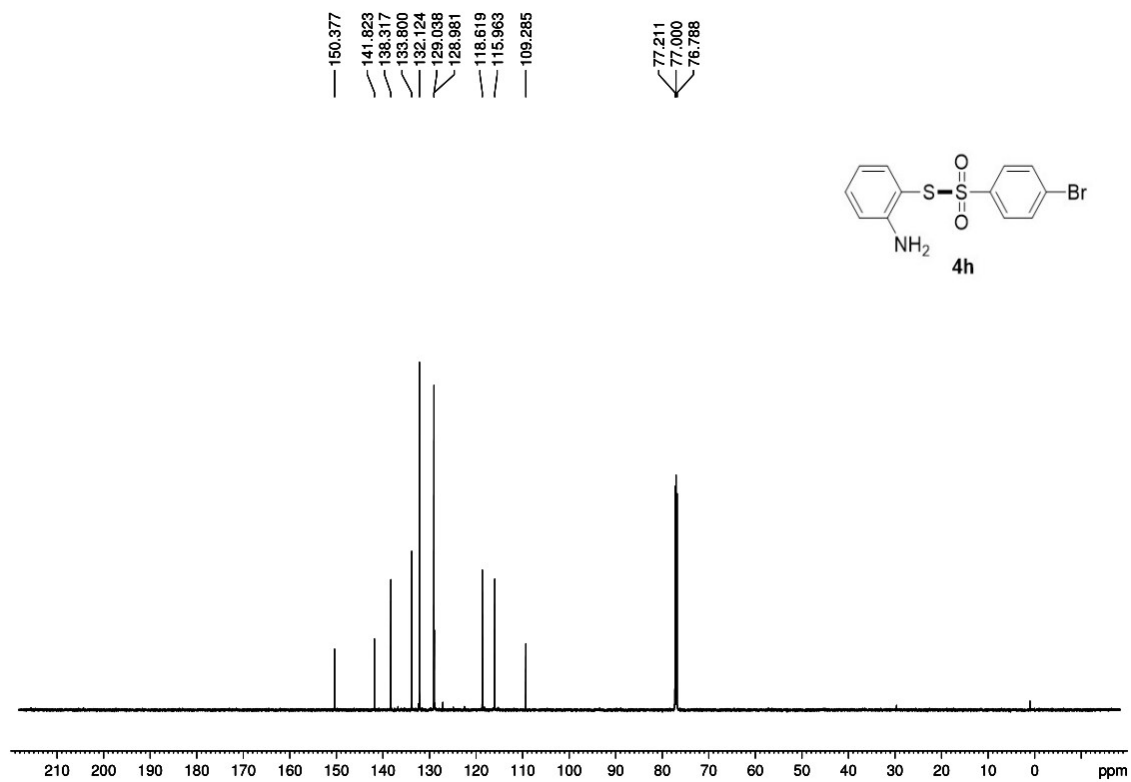

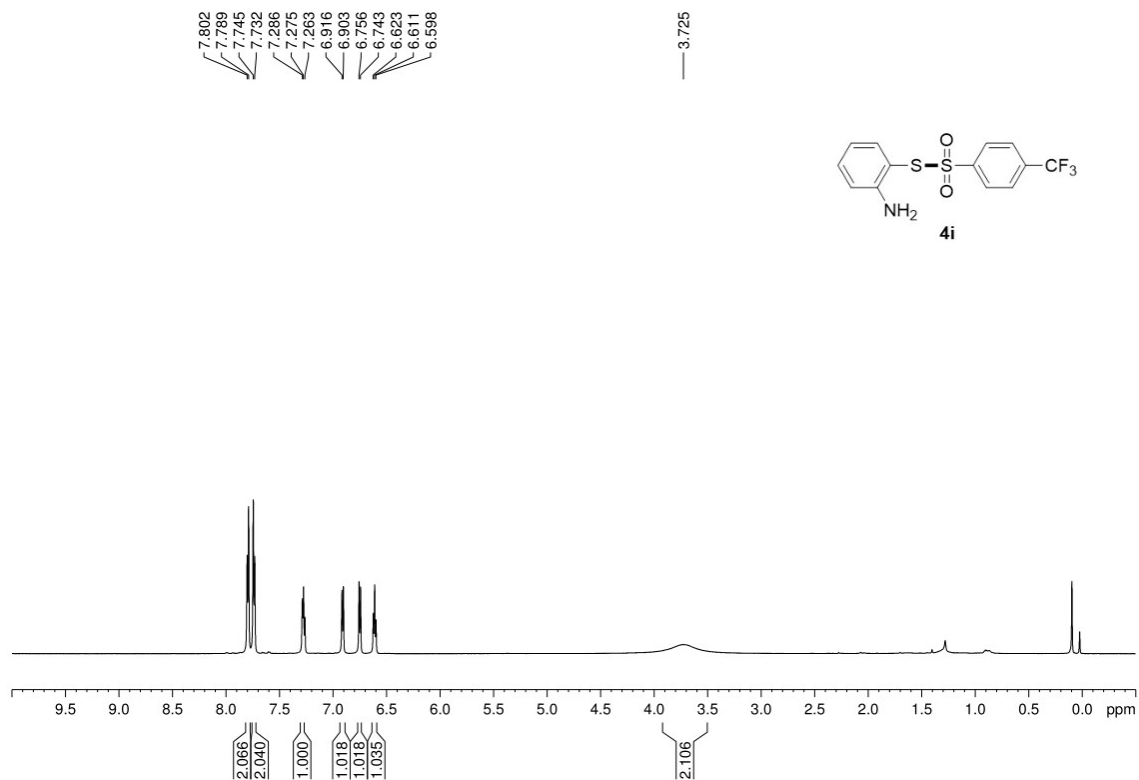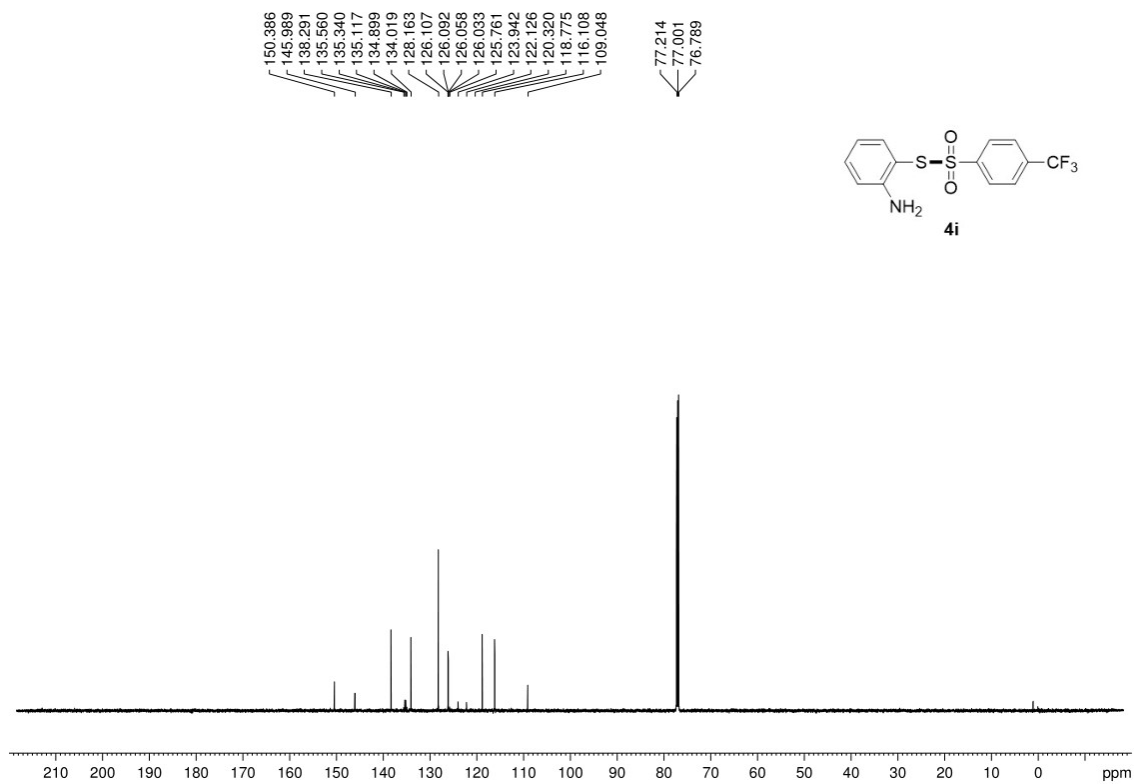

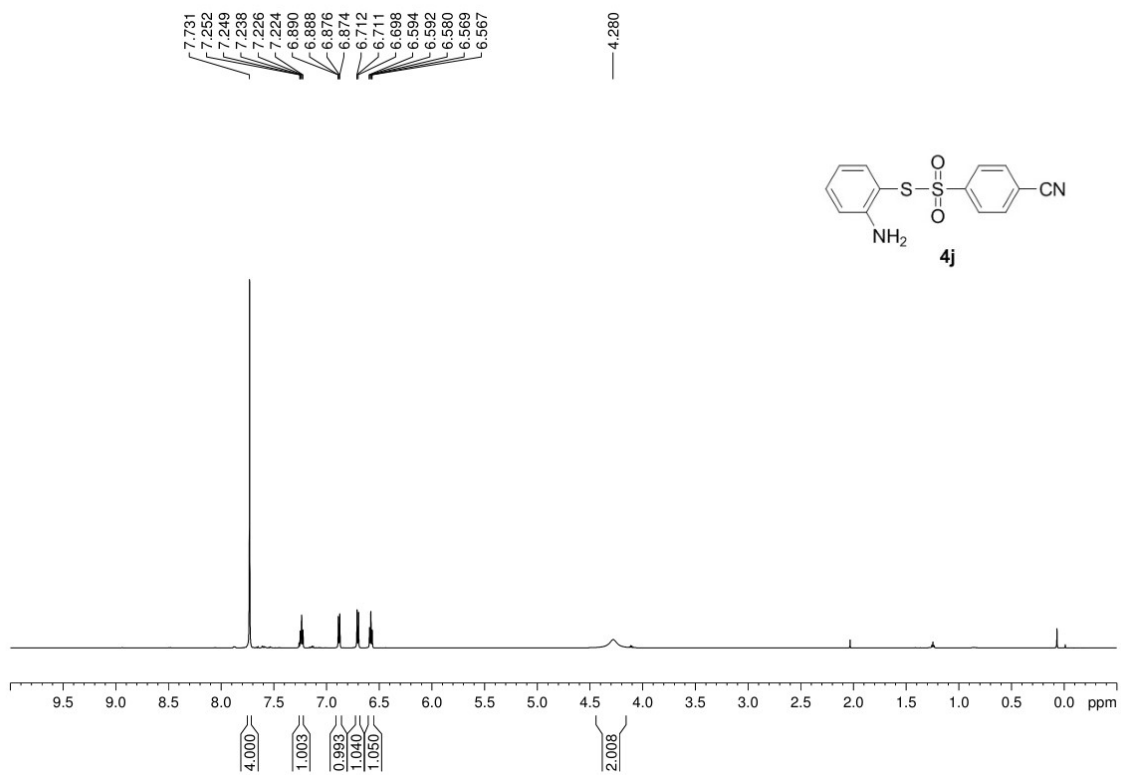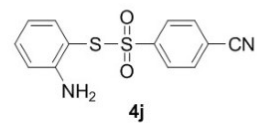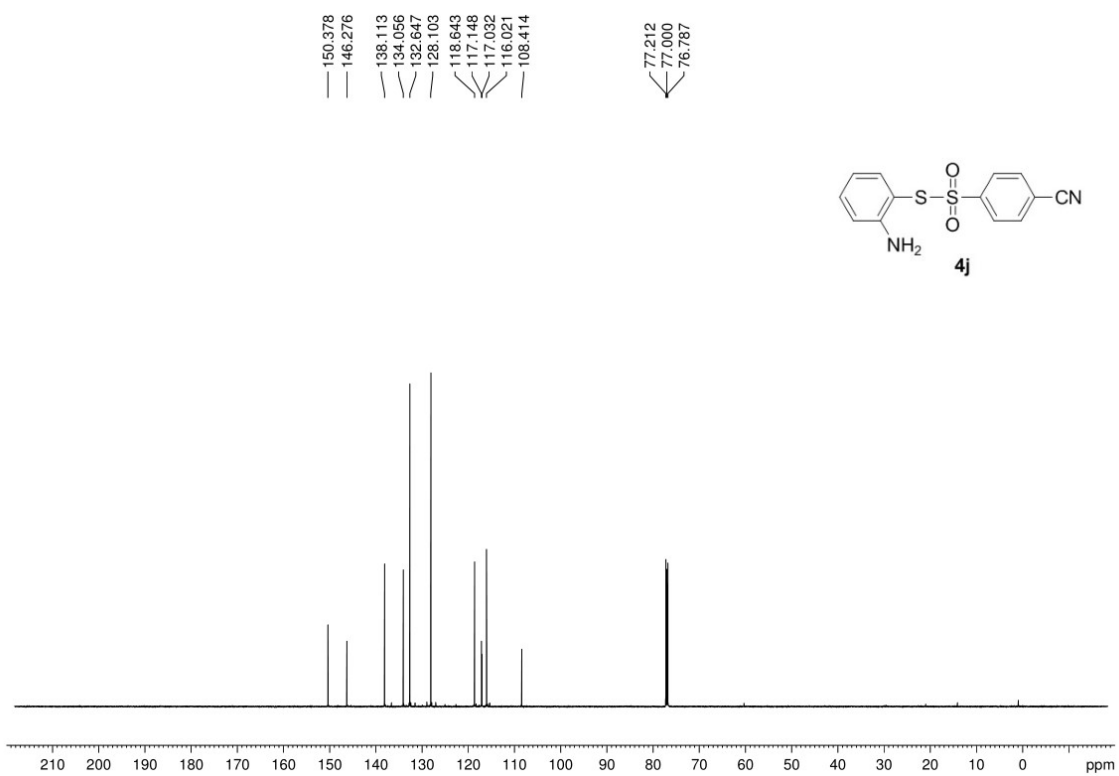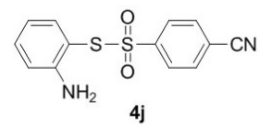

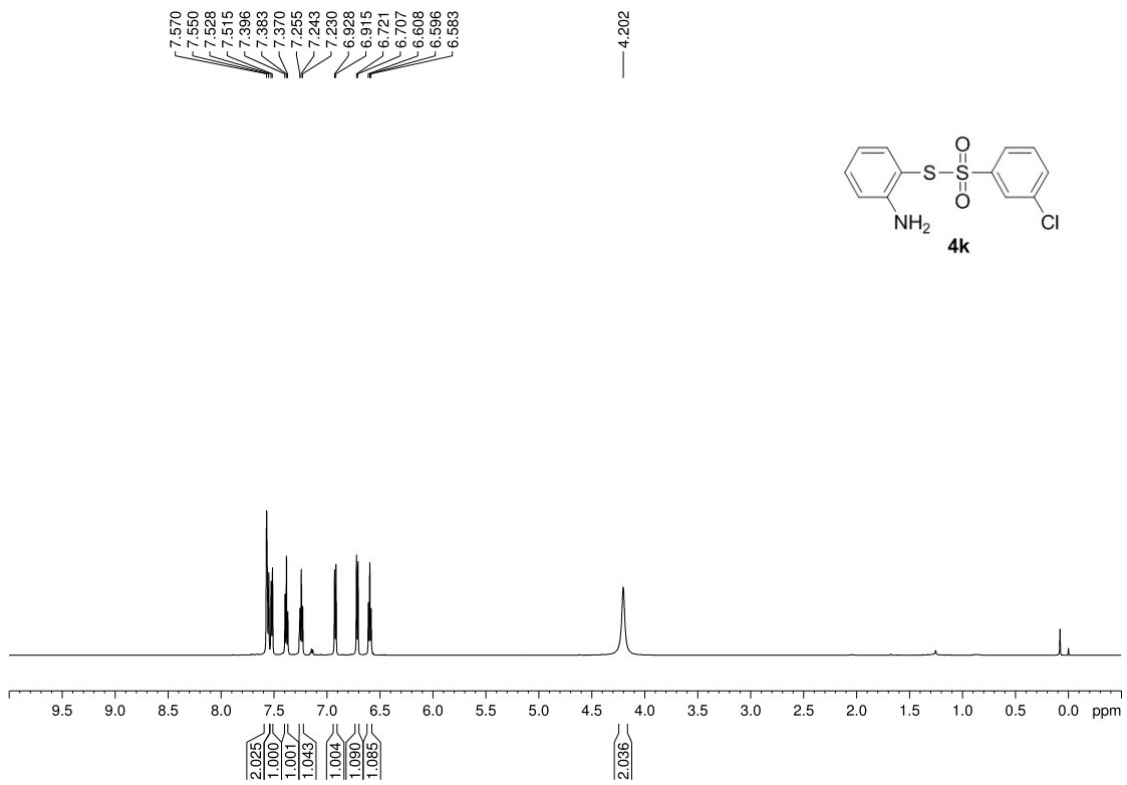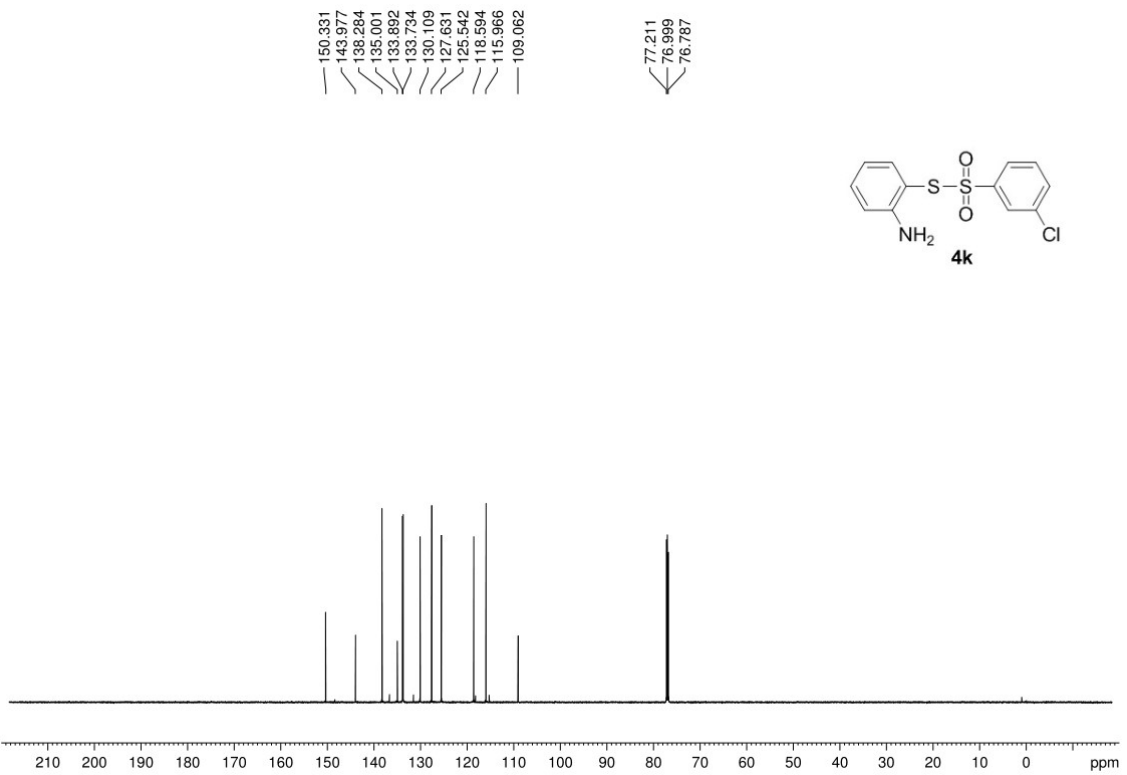

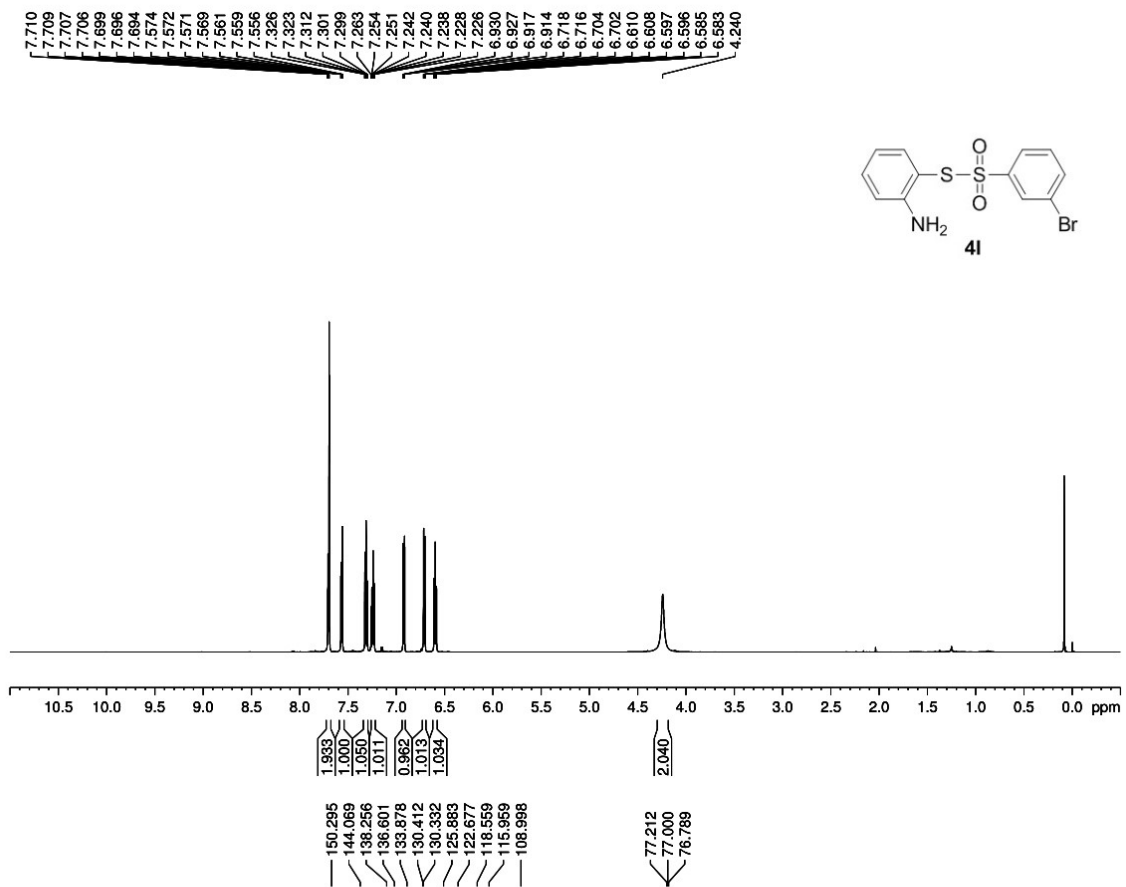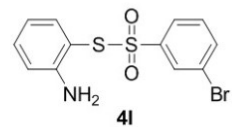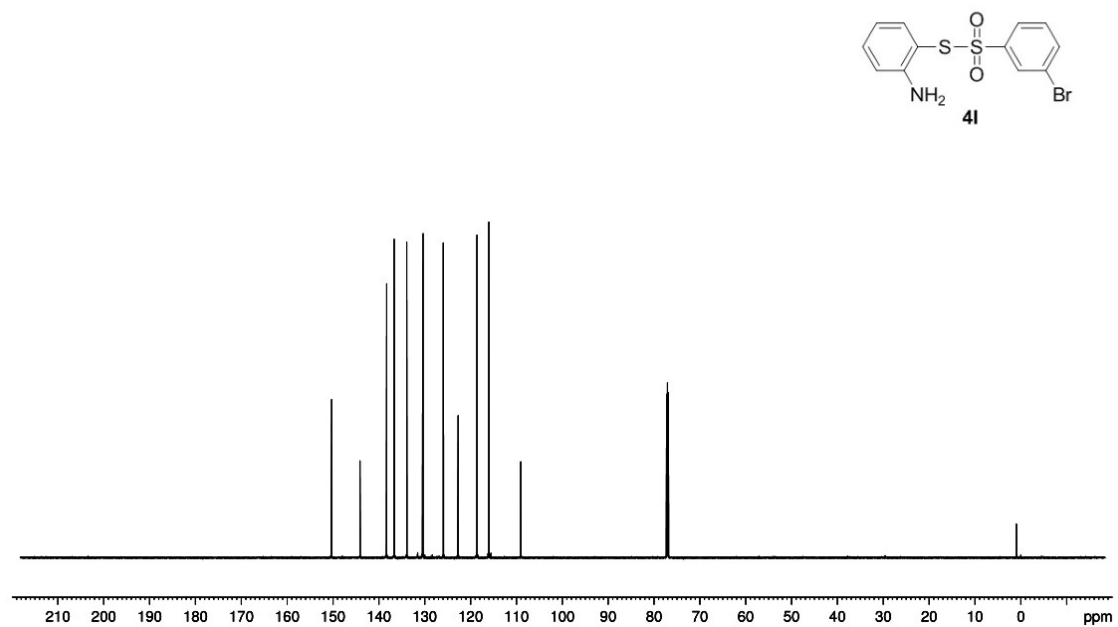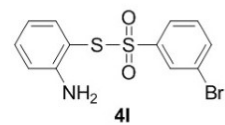

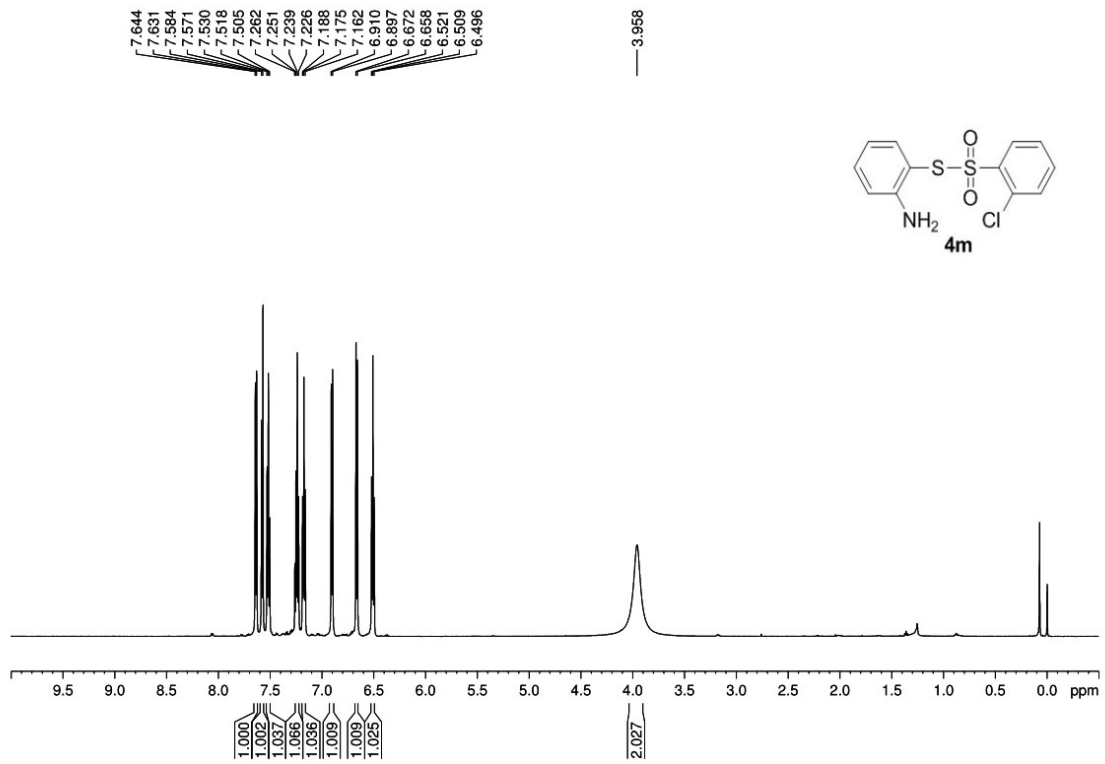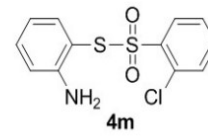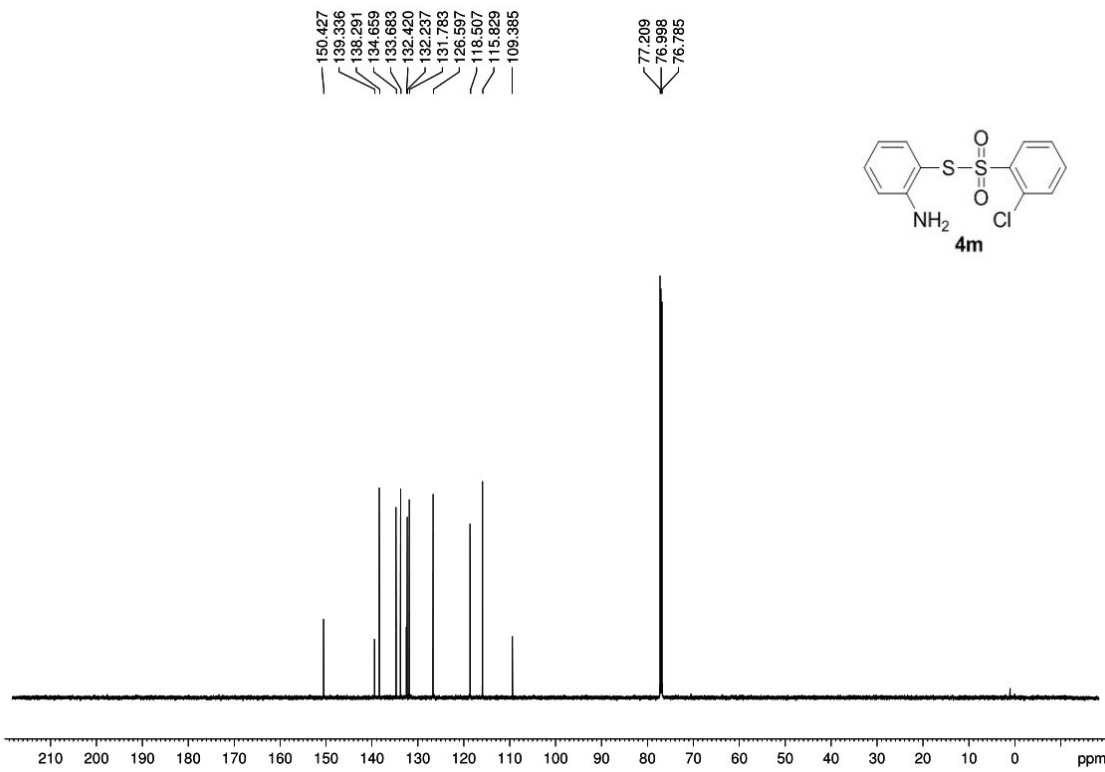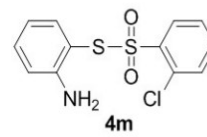



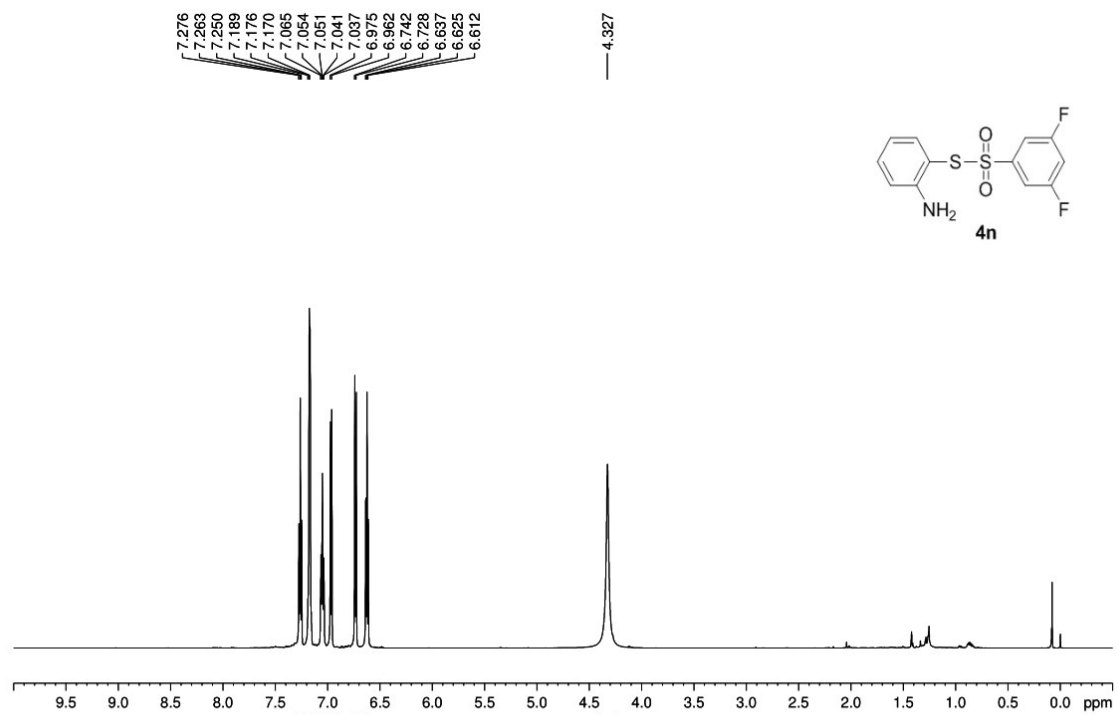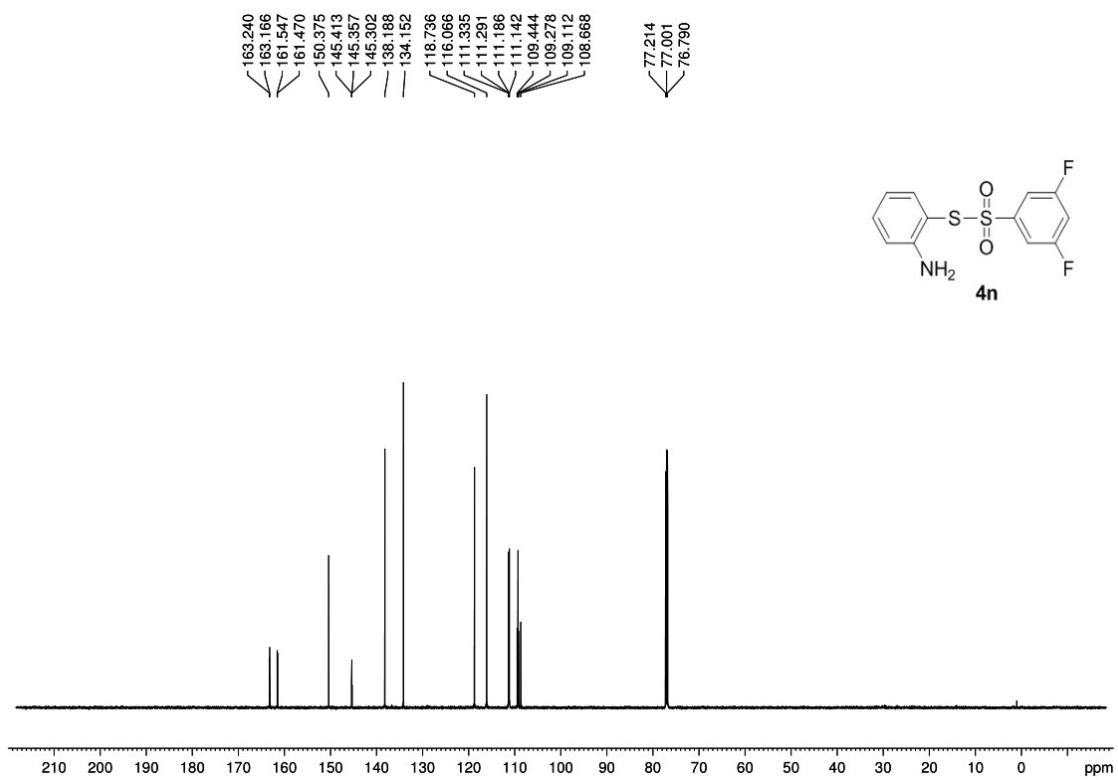

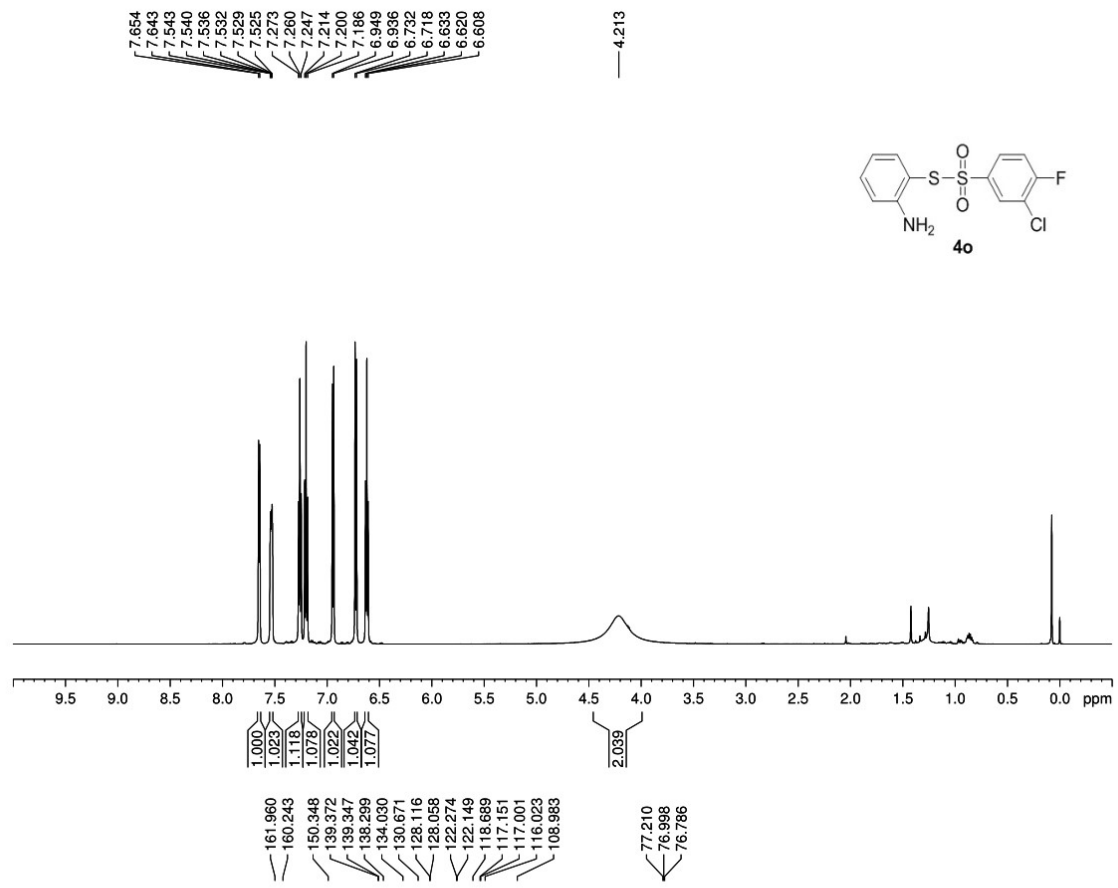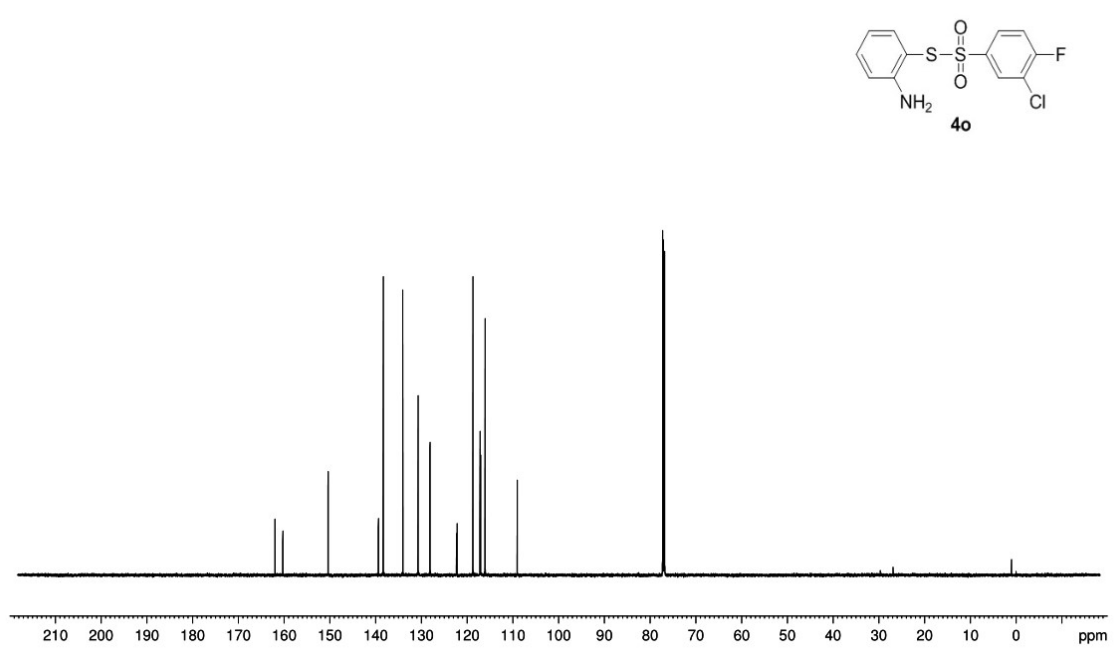

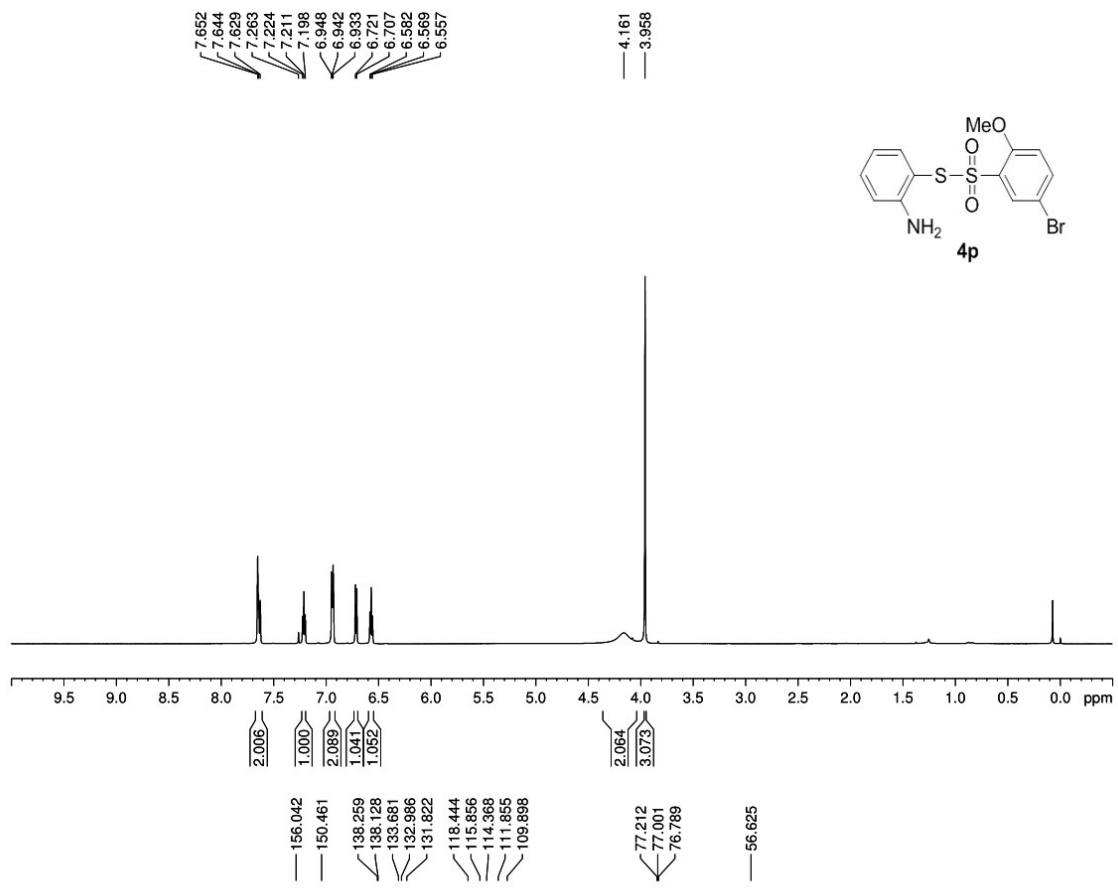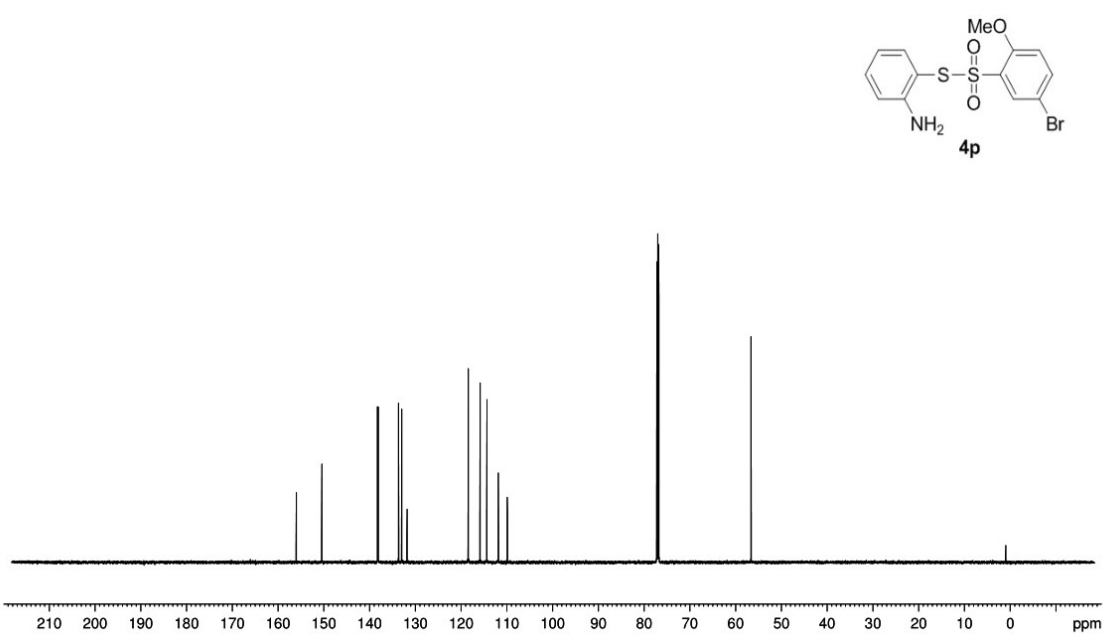

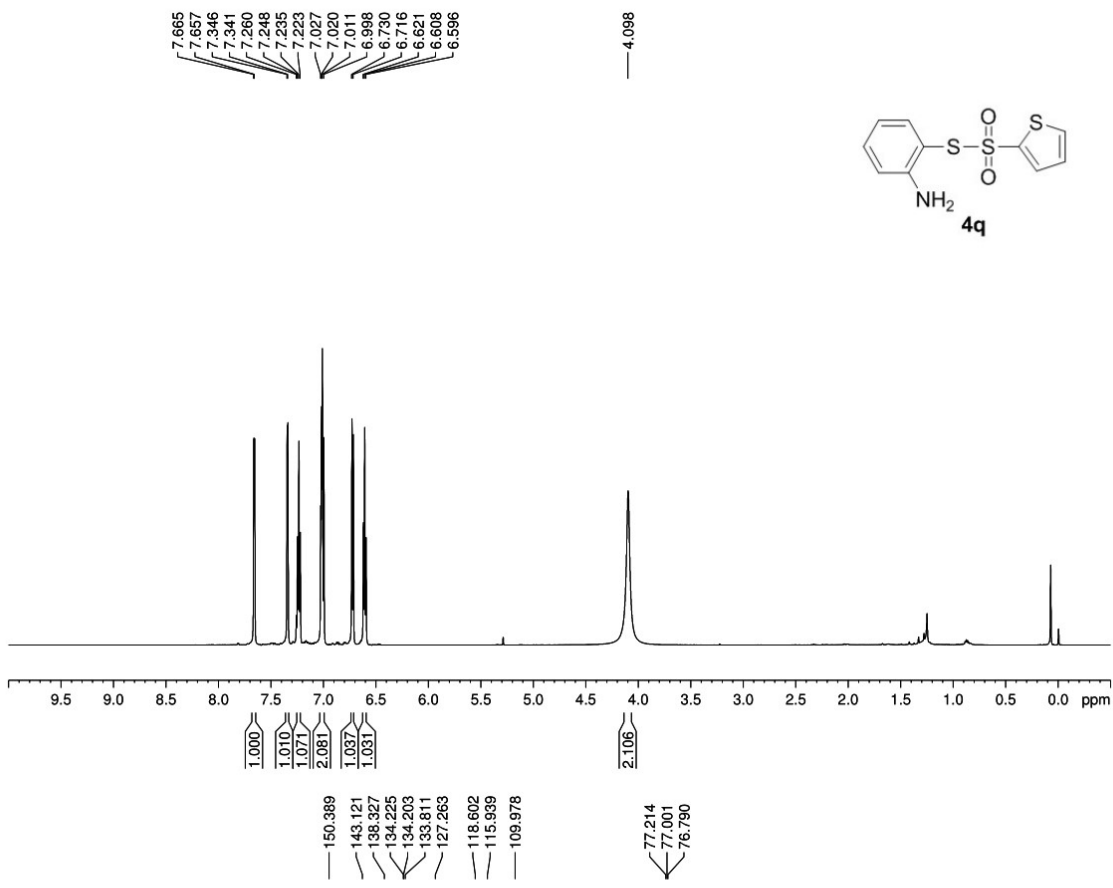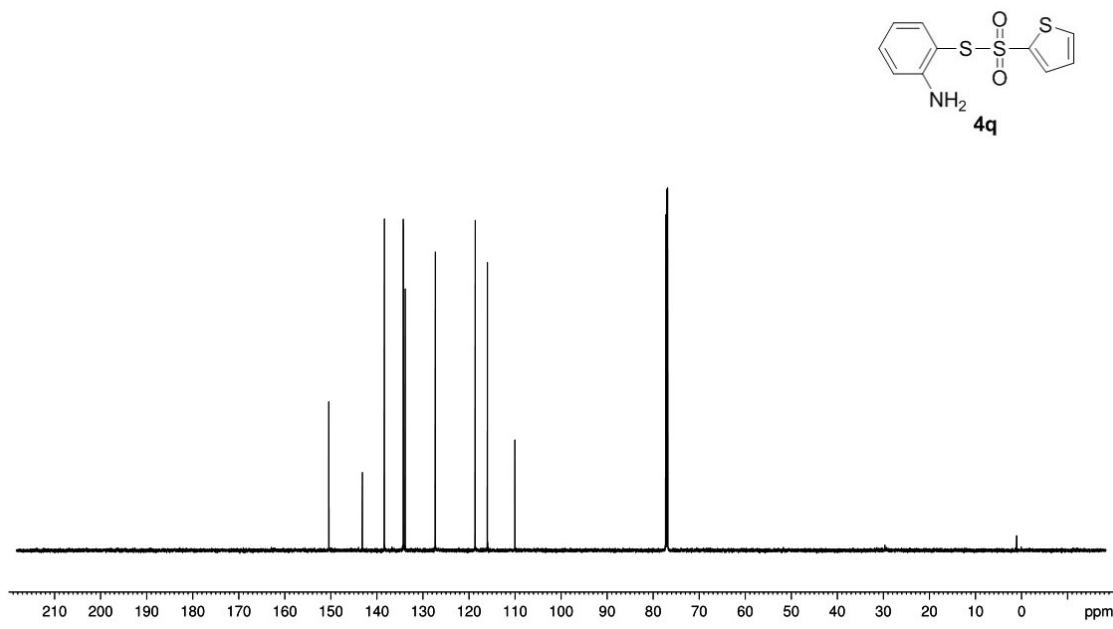

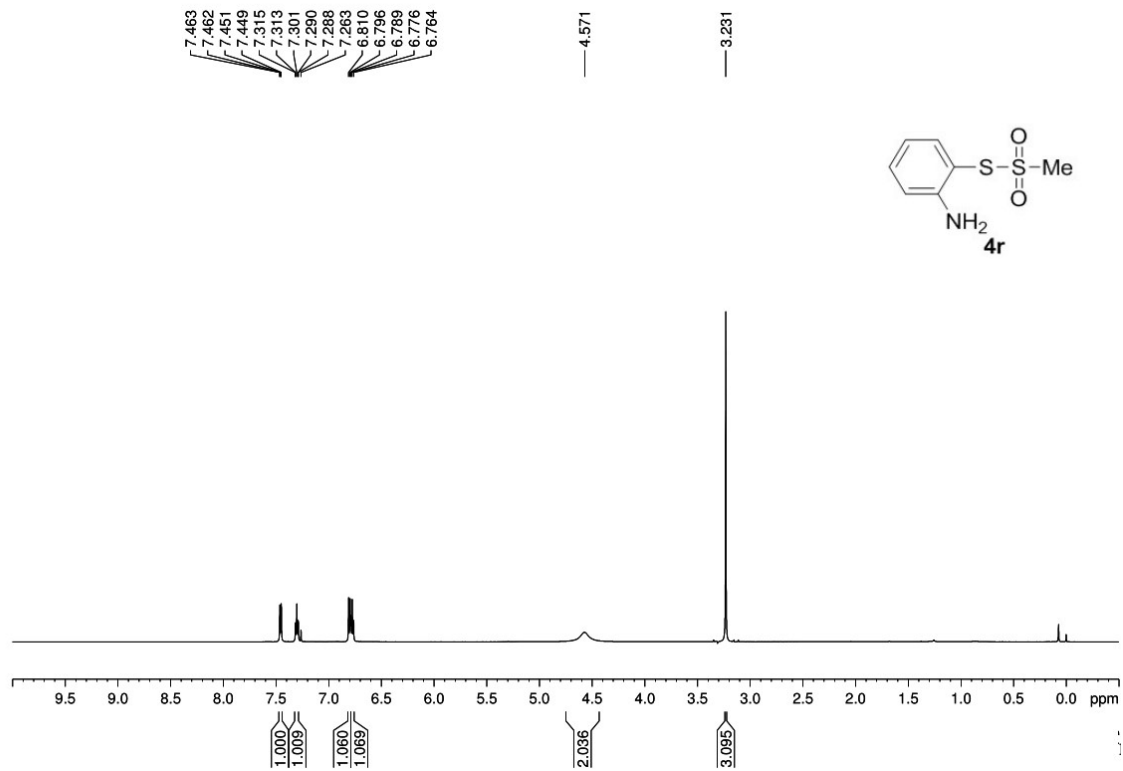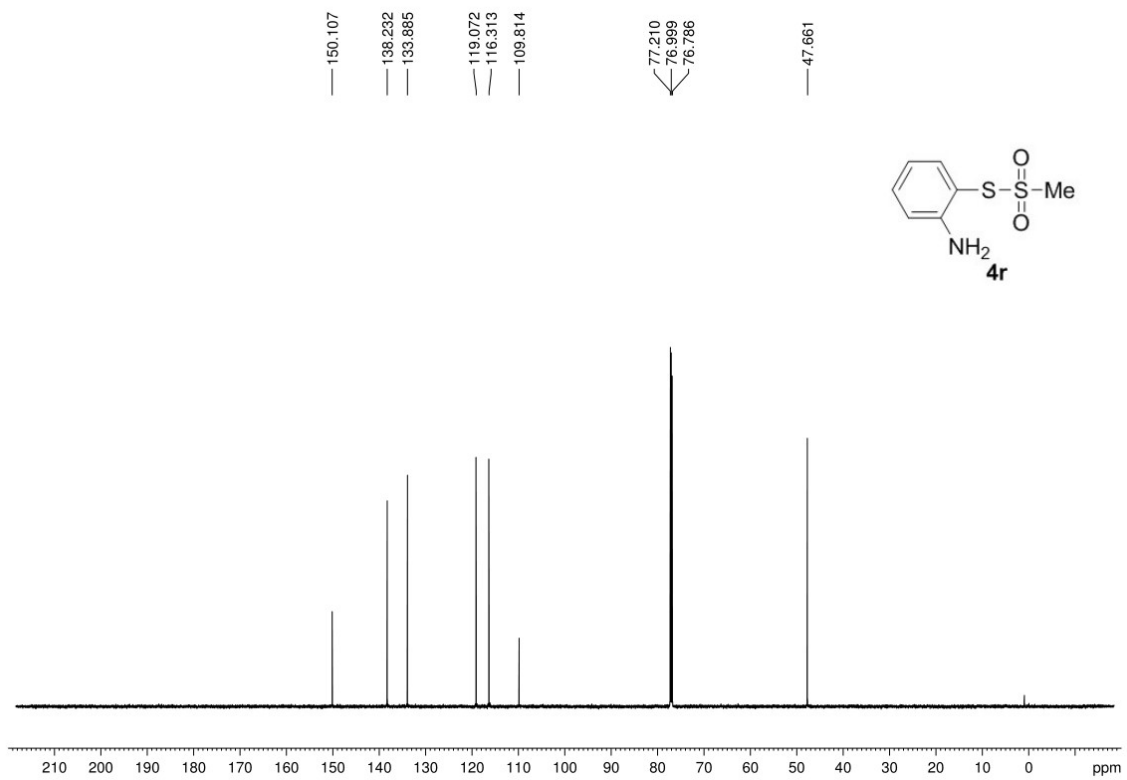

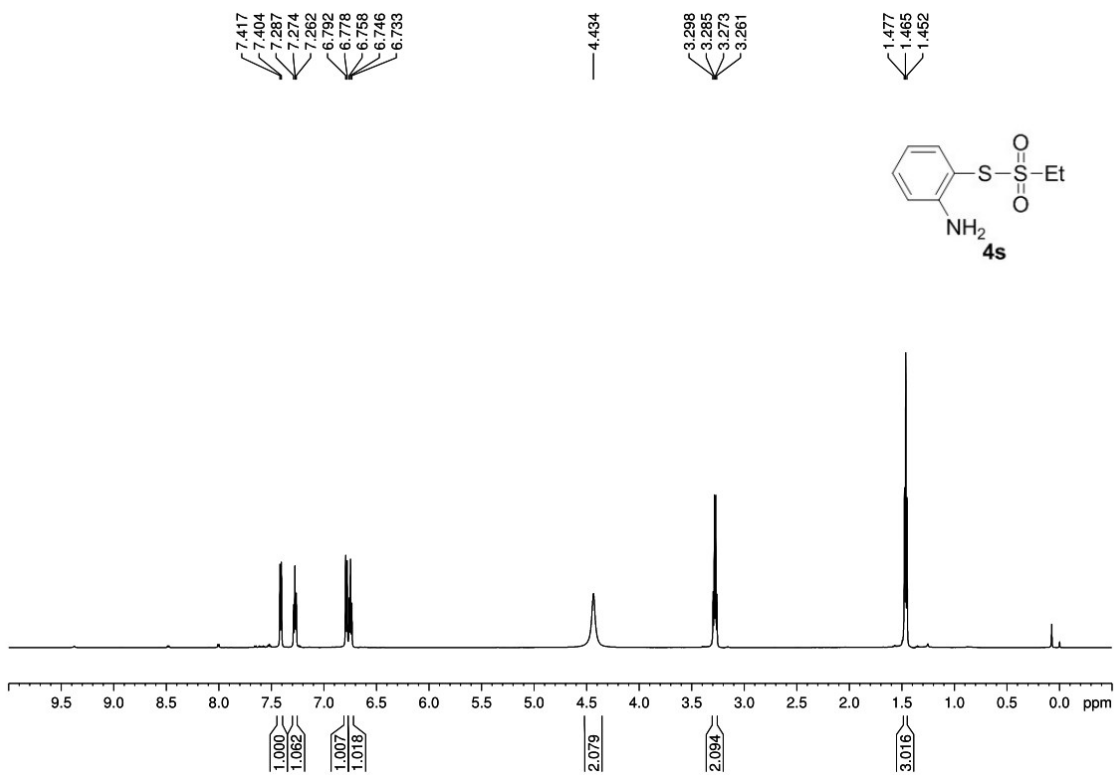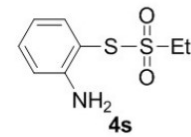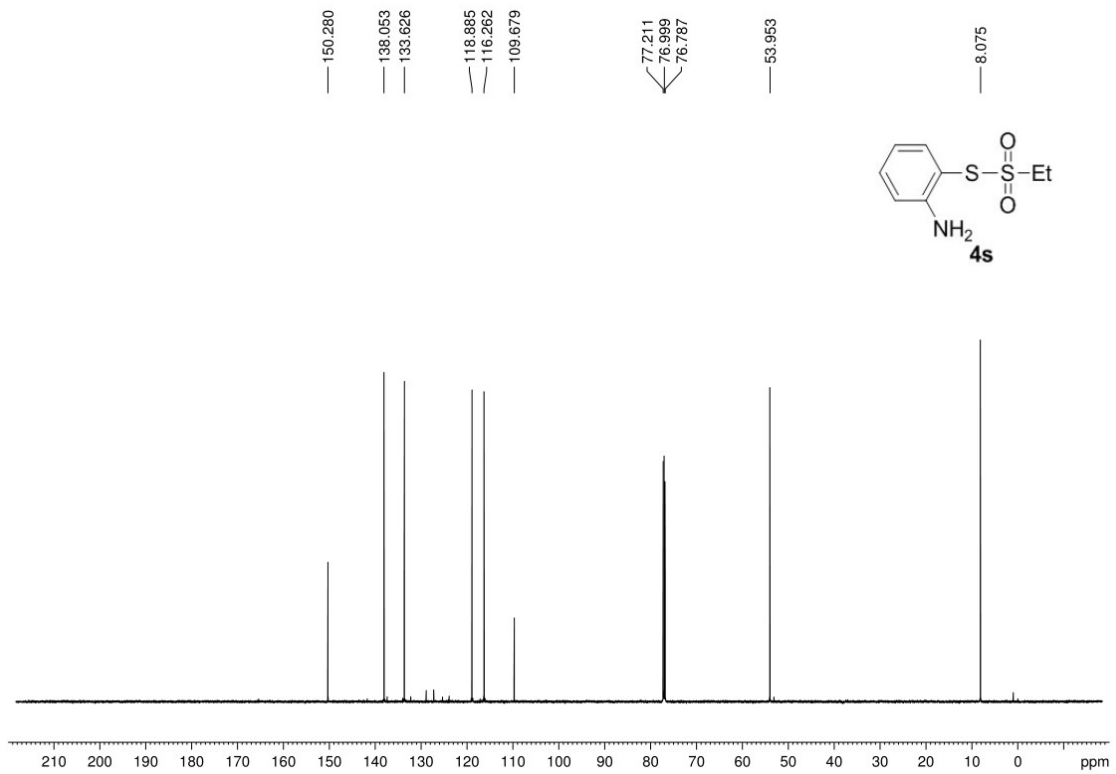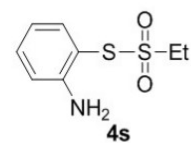

8.111  
8.099  
7.901  
7.887  
7.514  
7.500  
7.490  
7.398  
7.385  
7.372  
7.262

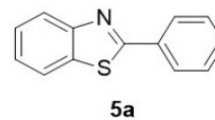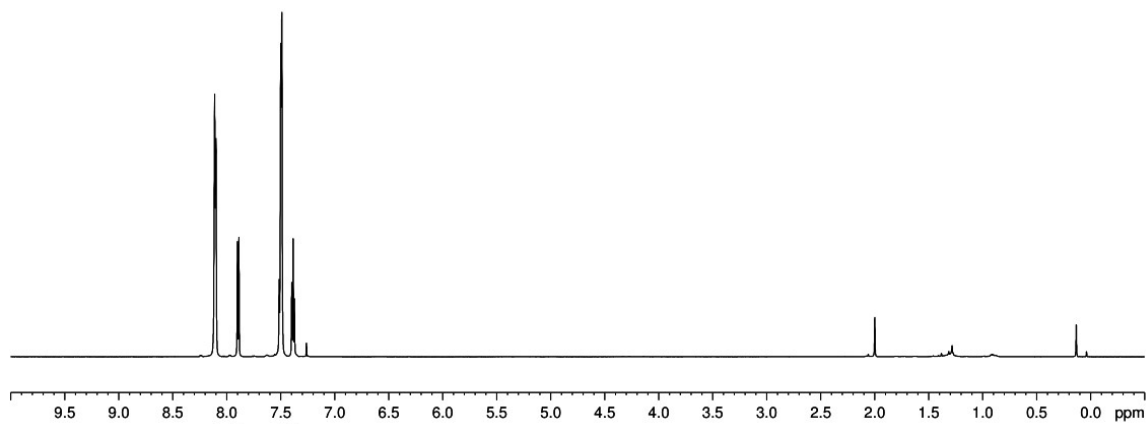

3.048  
1.000  
4.120  
1.061

167.976  
154.051  
134.974  
133.517  
130.880  
128.930  
127.467  
126.230  
125.102  
123.145  
121.535  
77.210  
76.999  
76.787

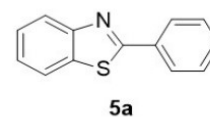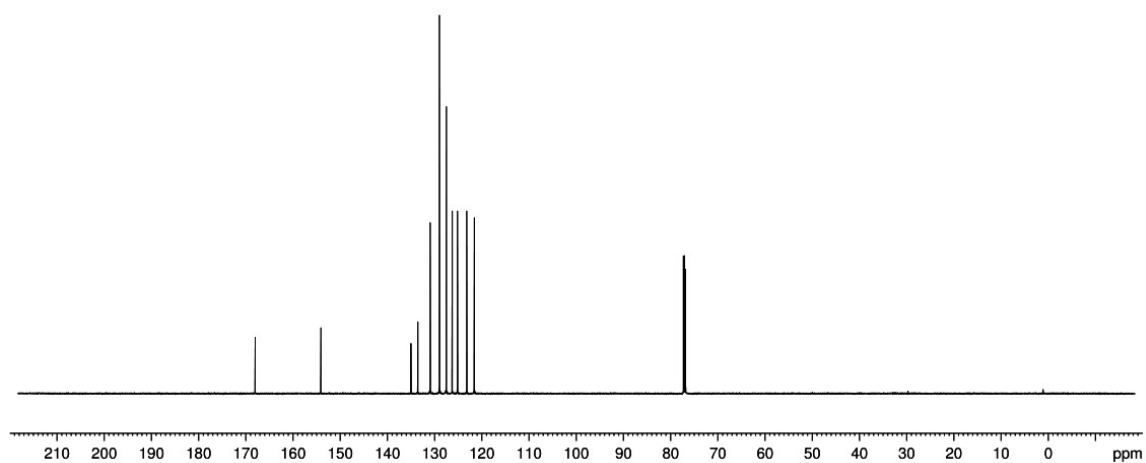

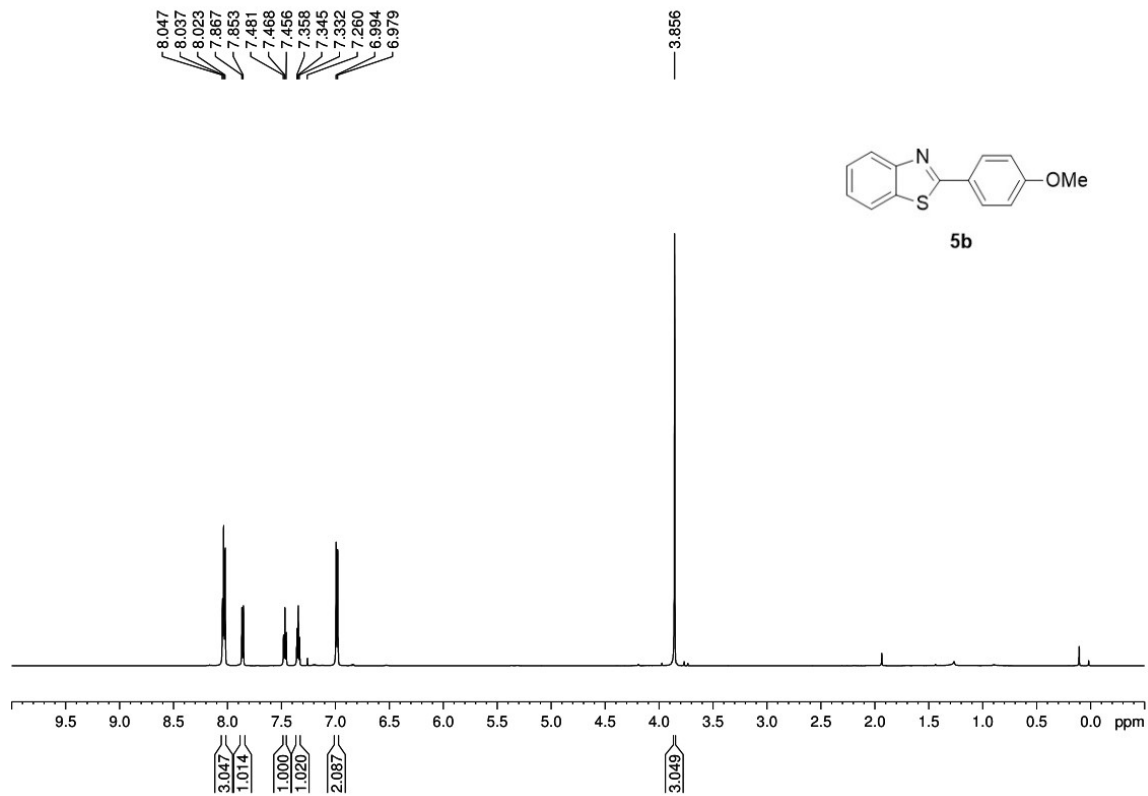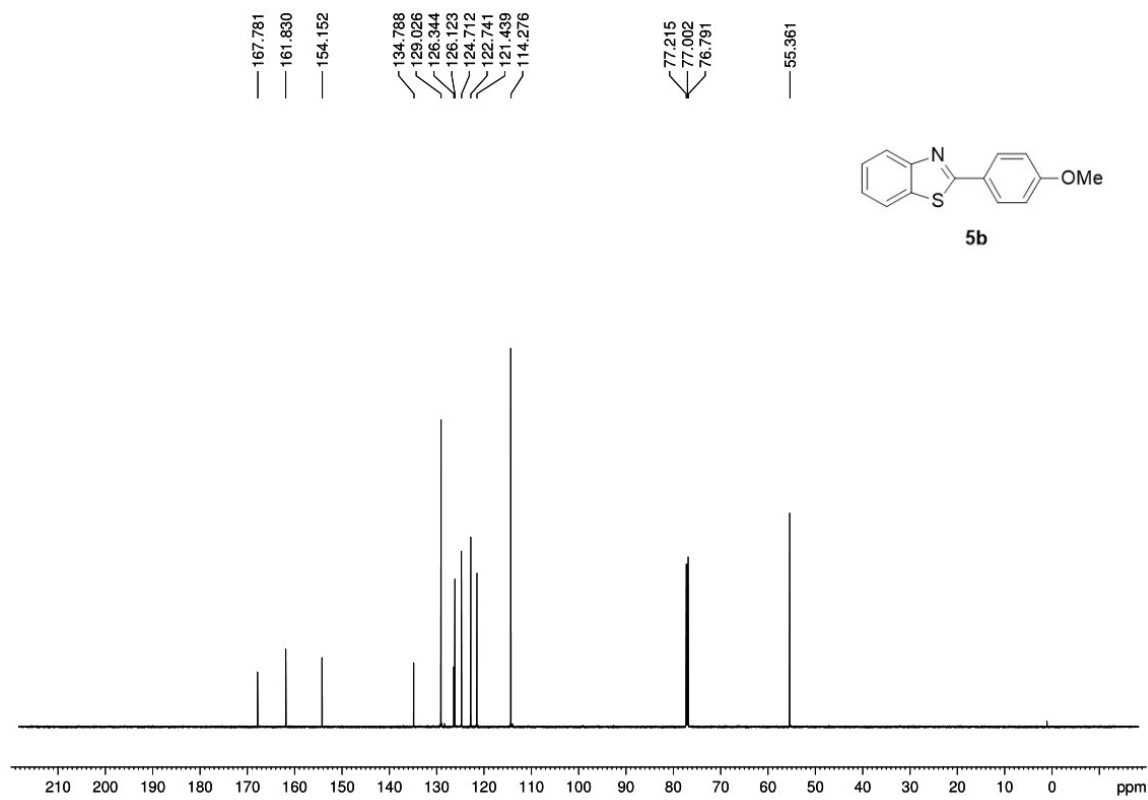



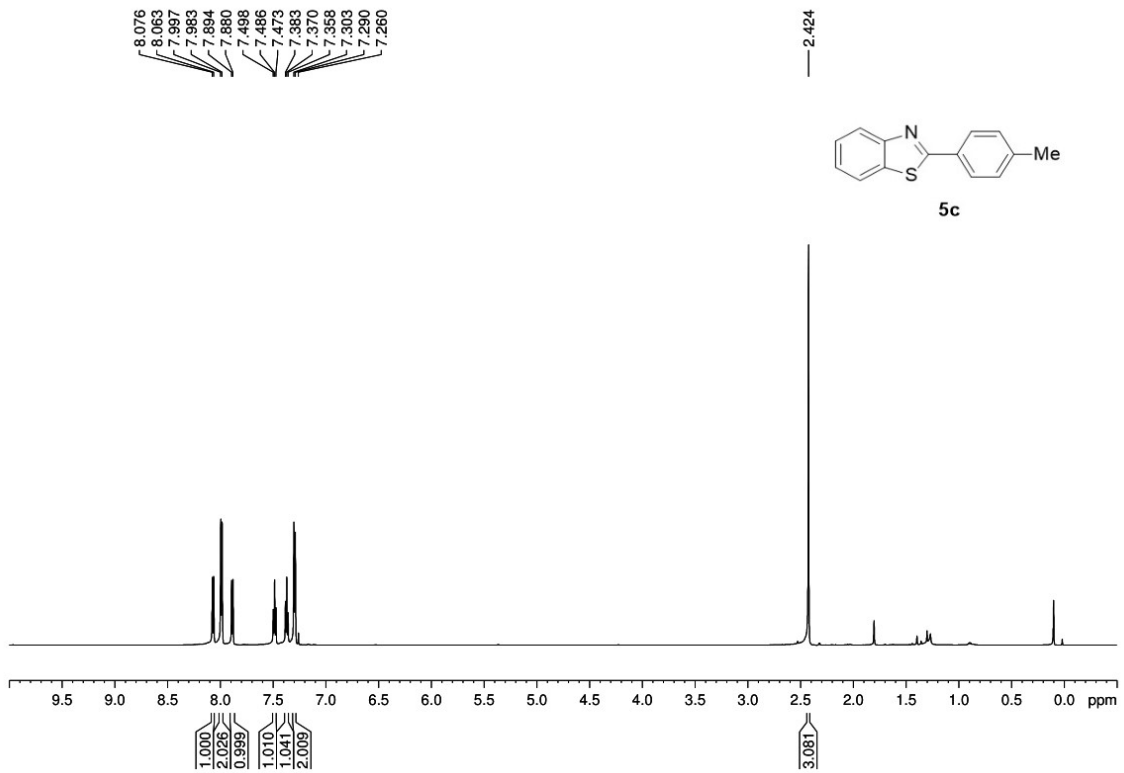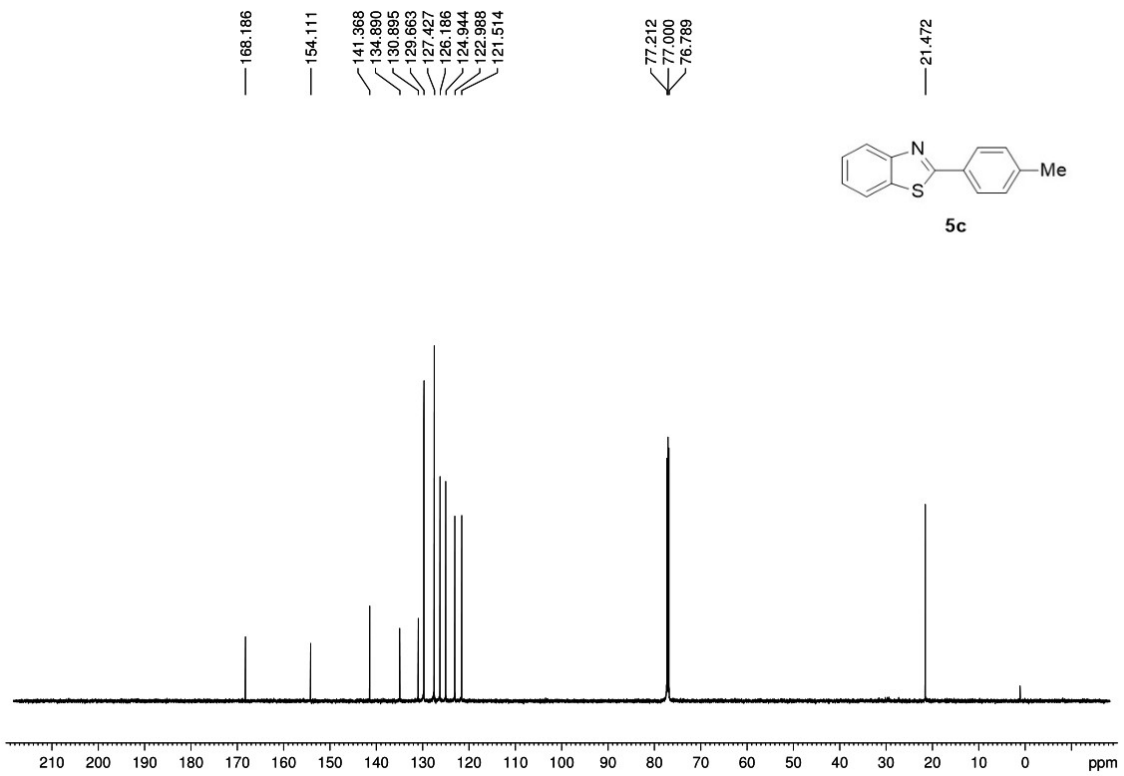

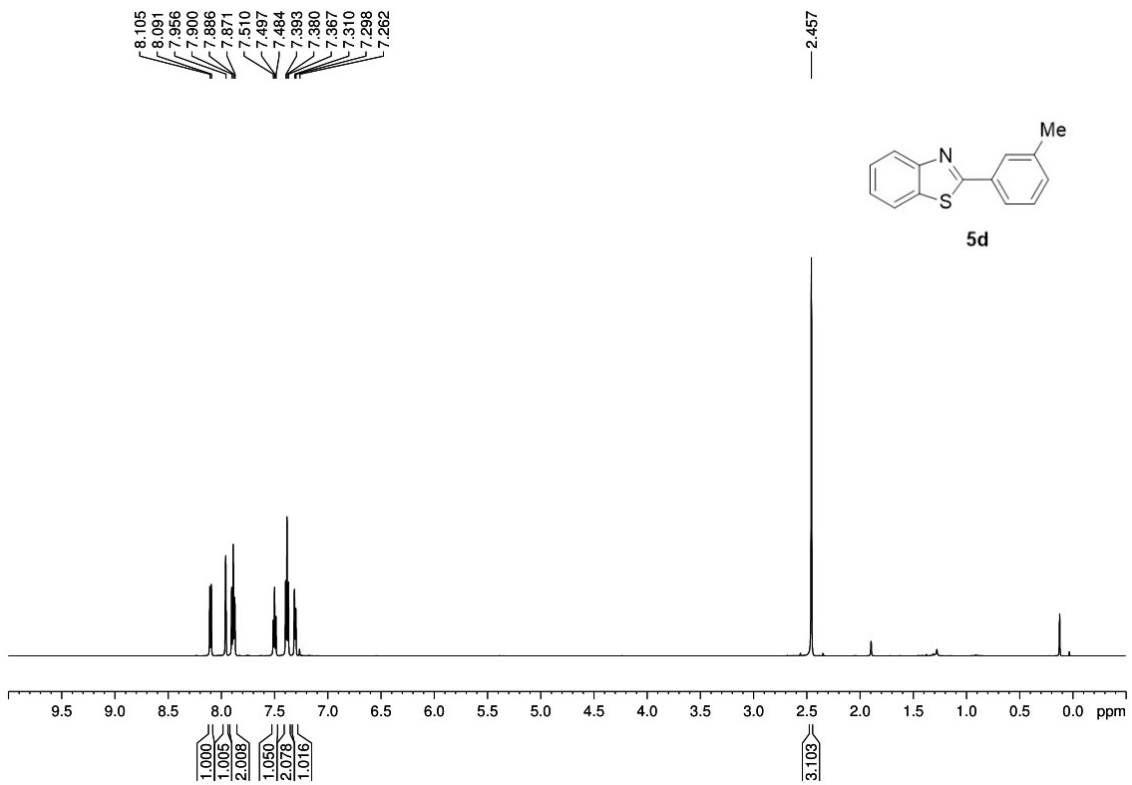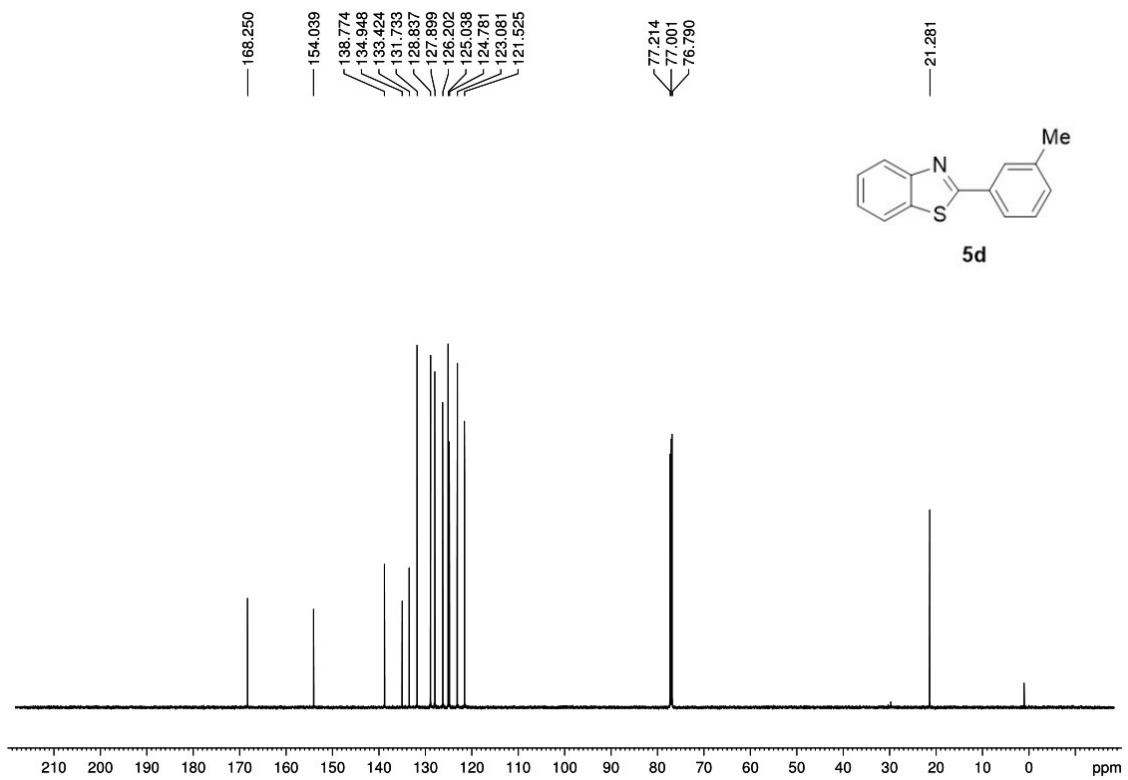

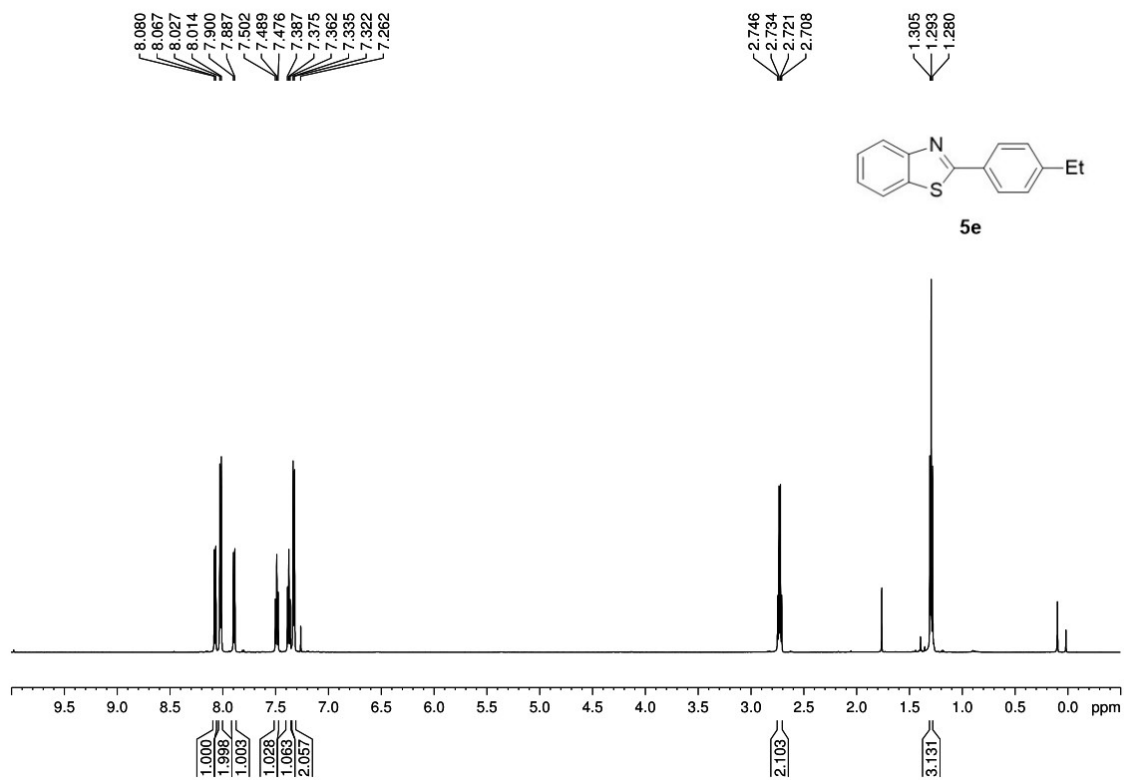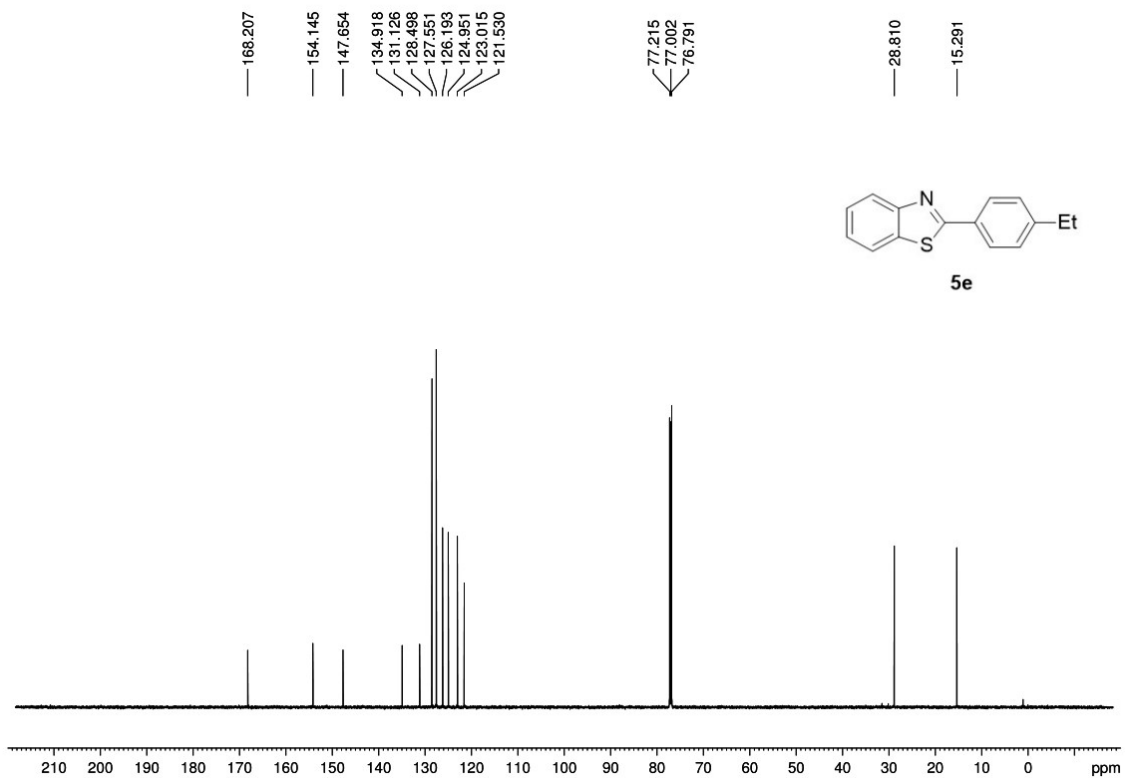

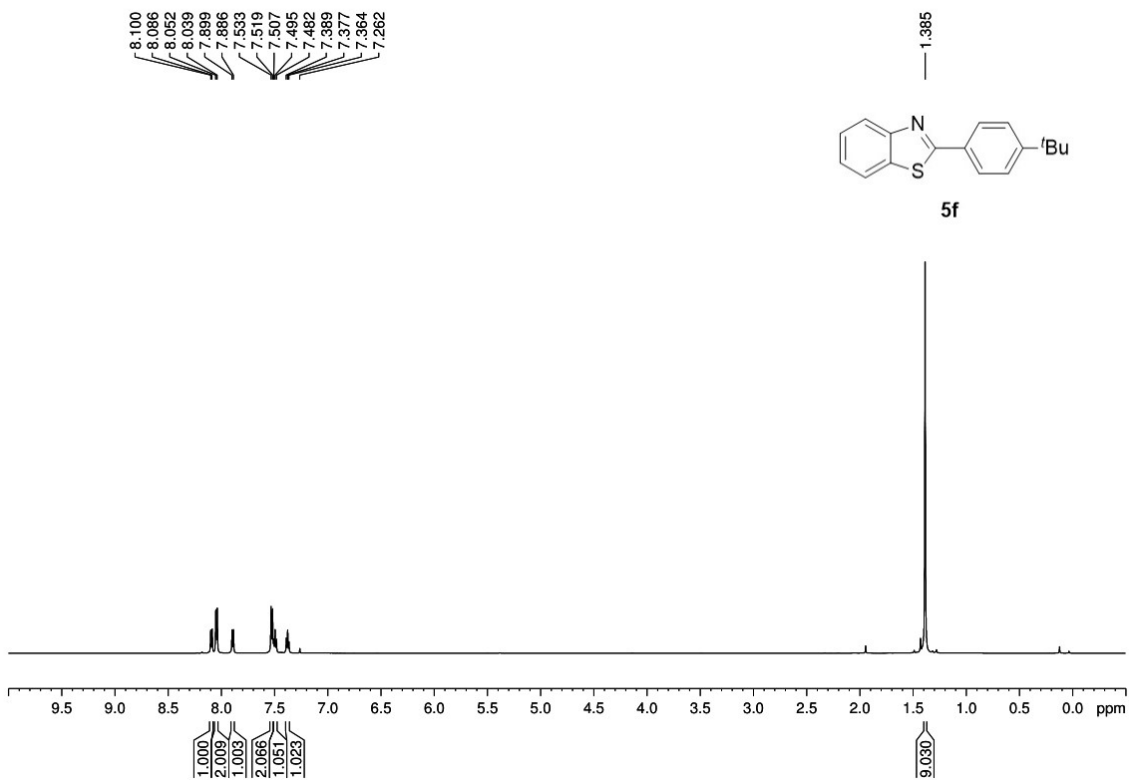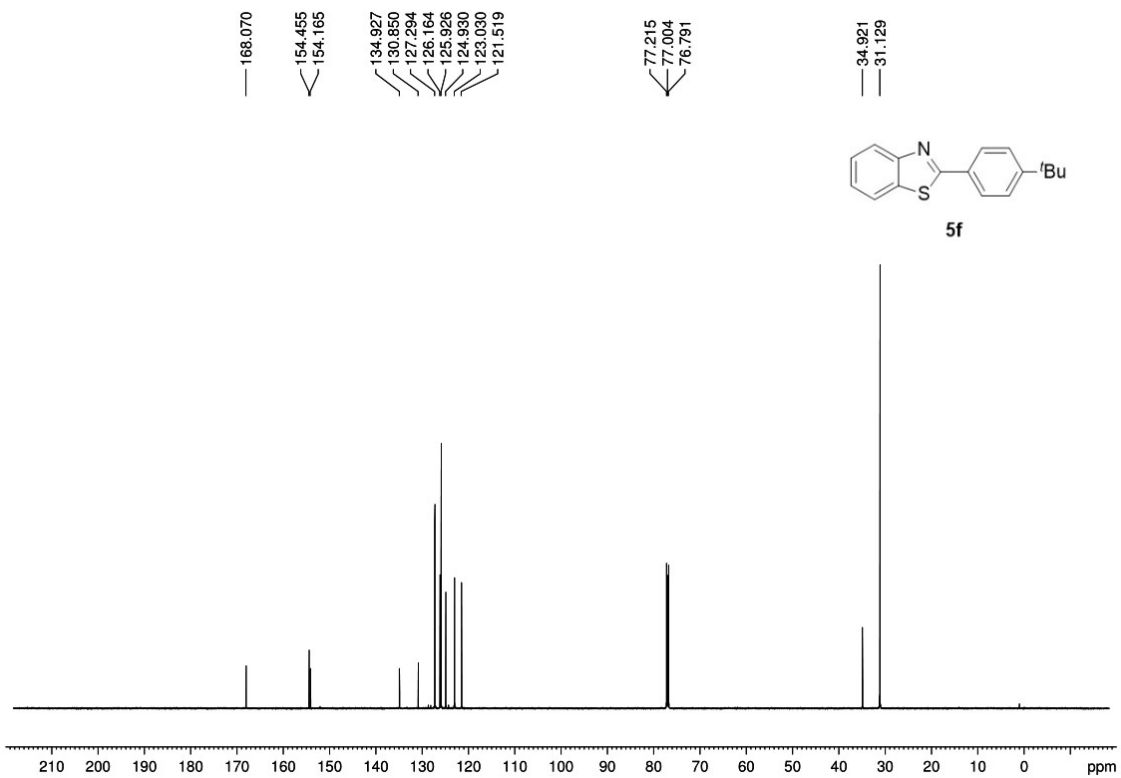

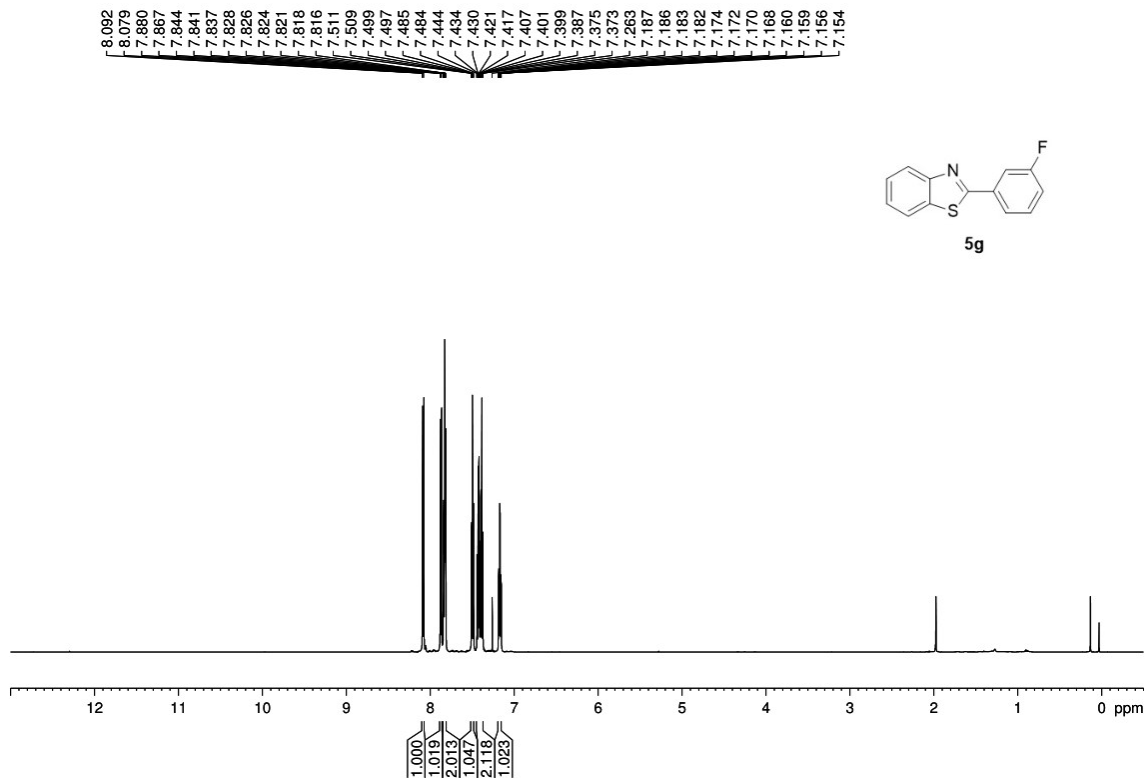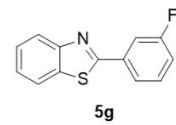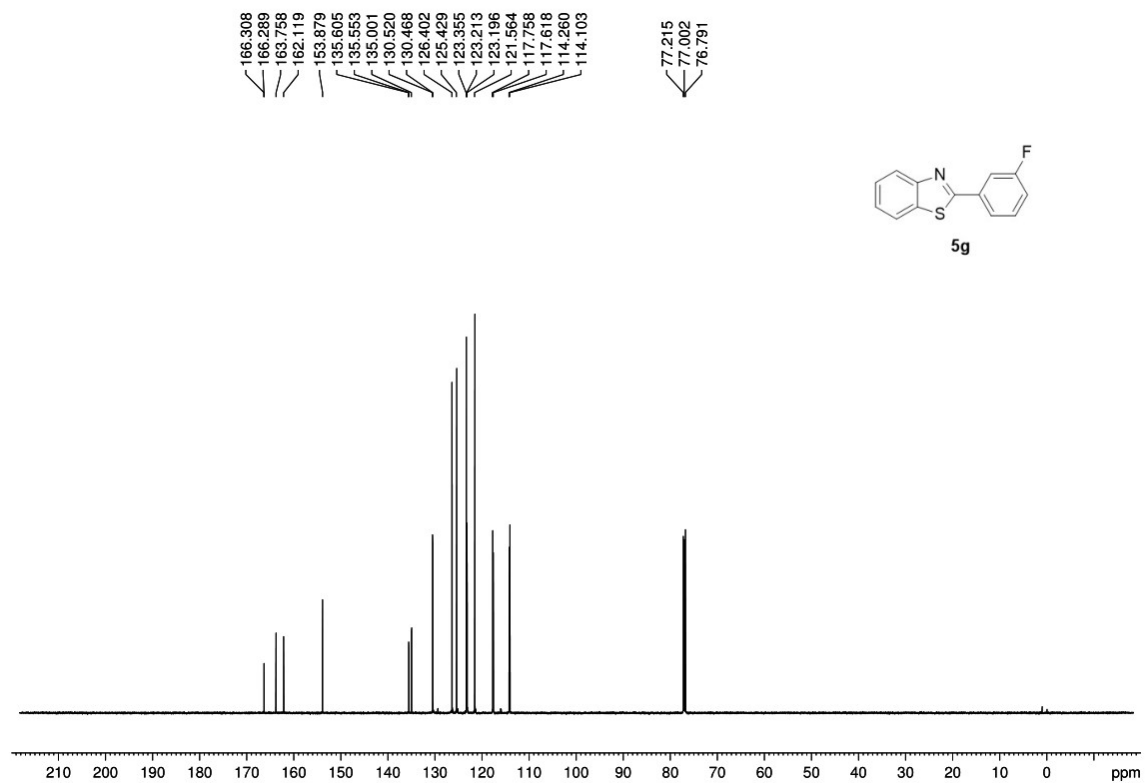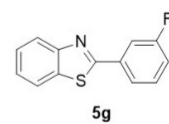

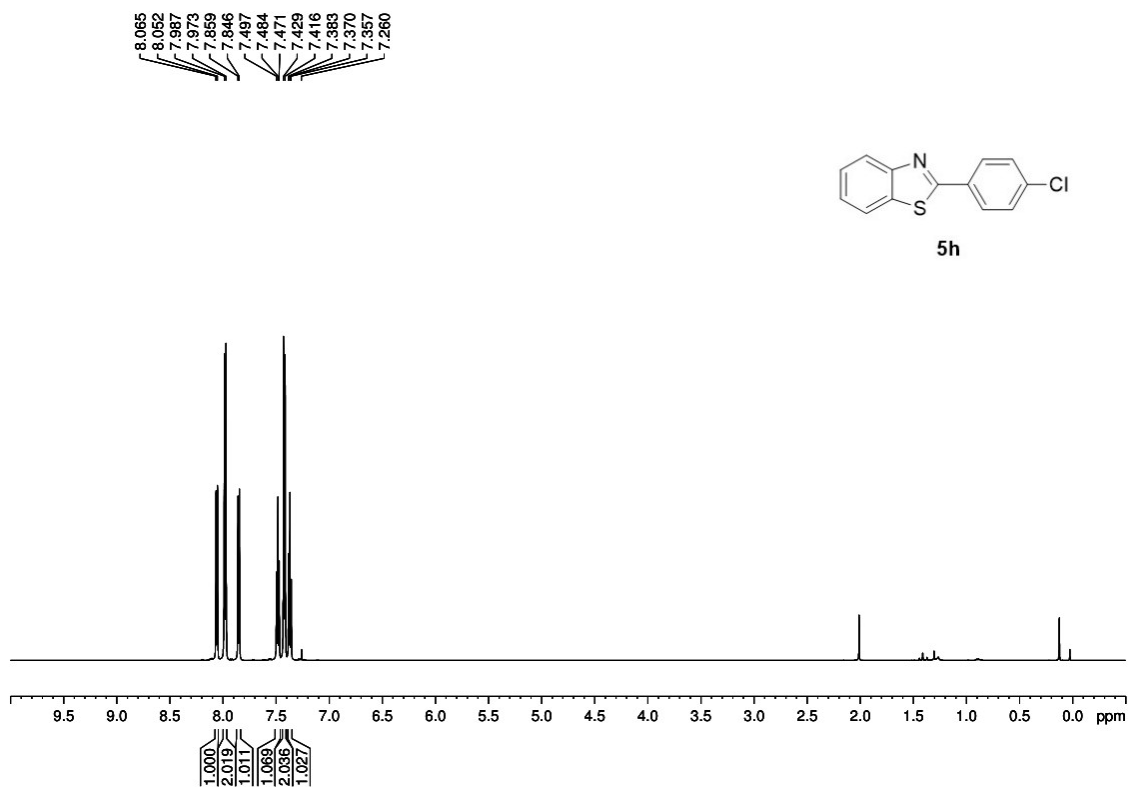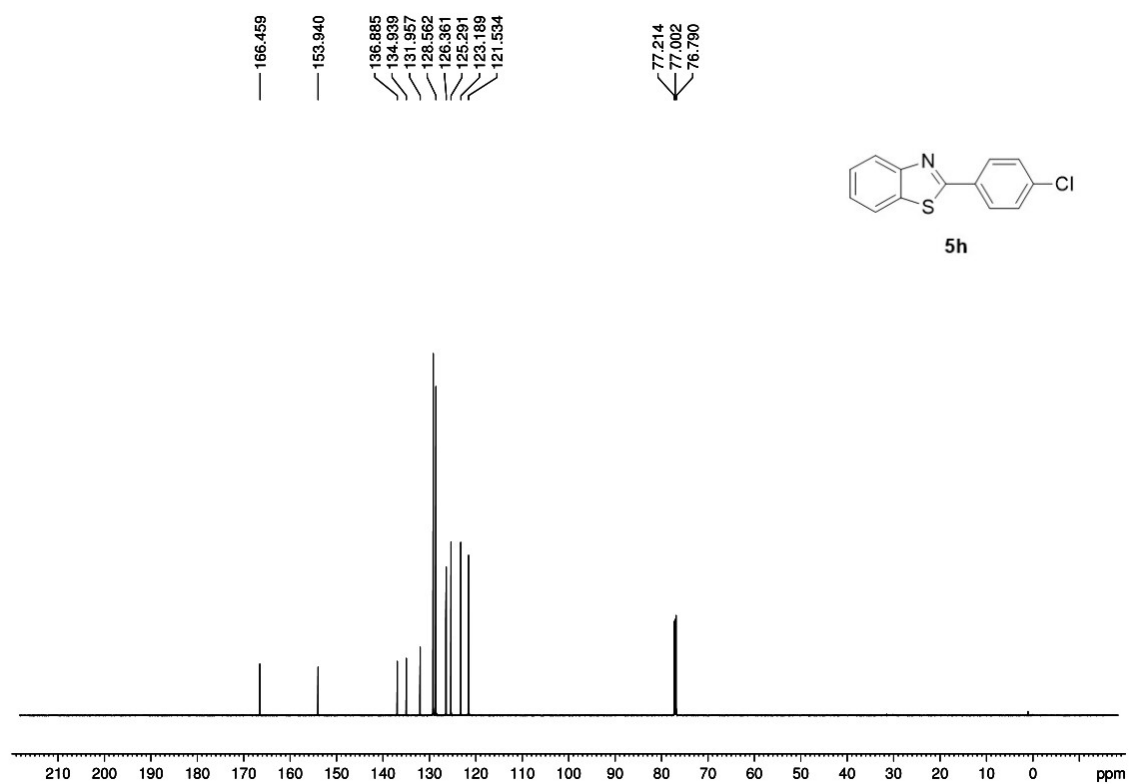

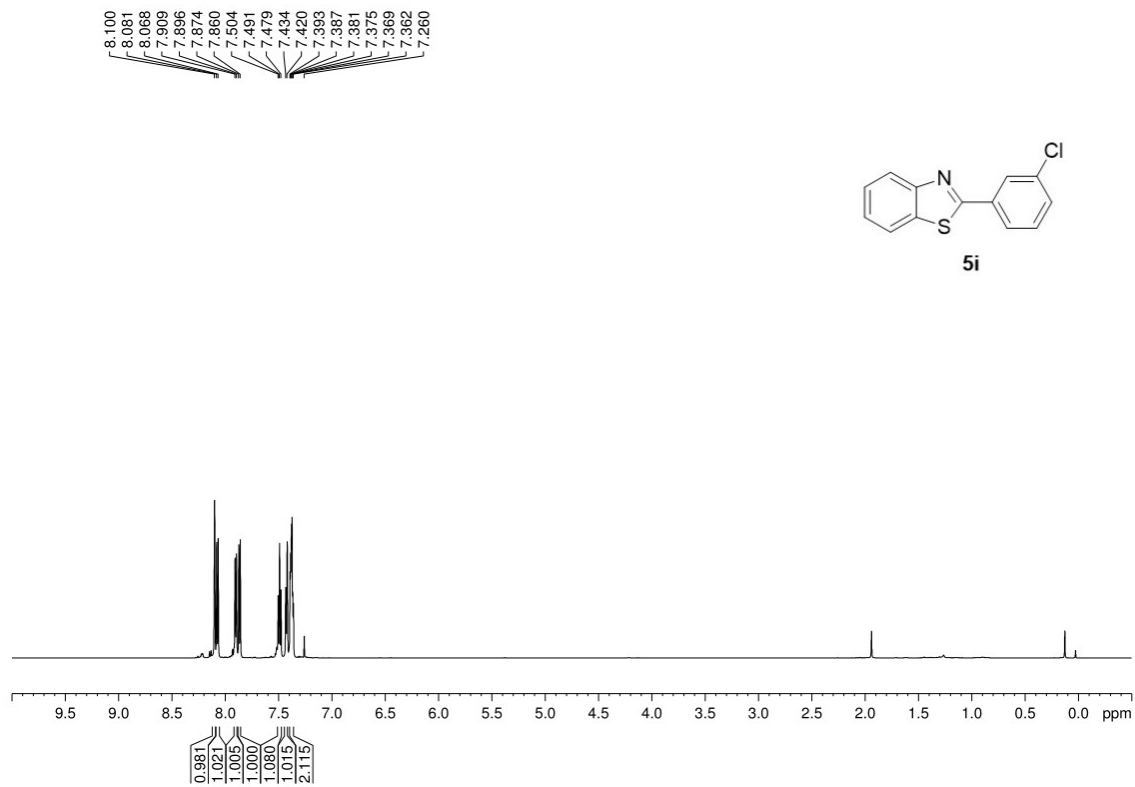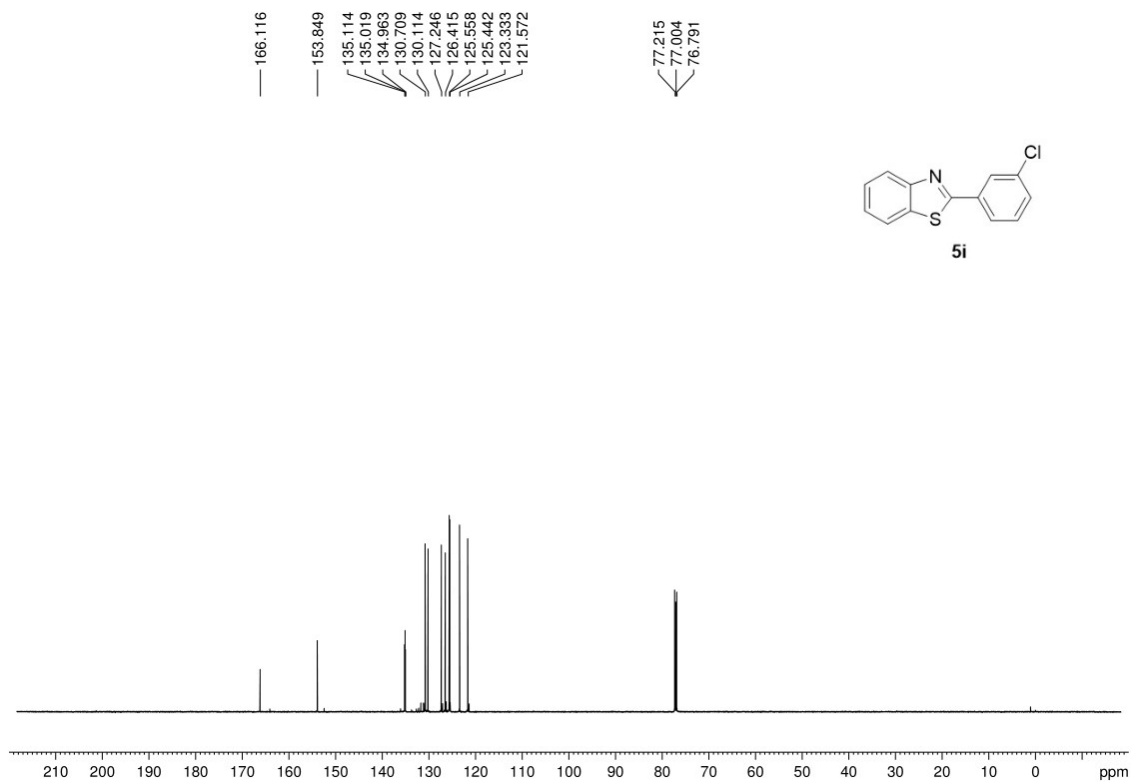

8.072  
8.058  
7.947  
7.933  
7.892  
7.878  
7.617  
7.603  
7.510  
7.497  
7.485  
7.405  
7.392  
7.380  
7.260

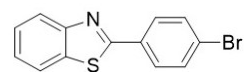

5j

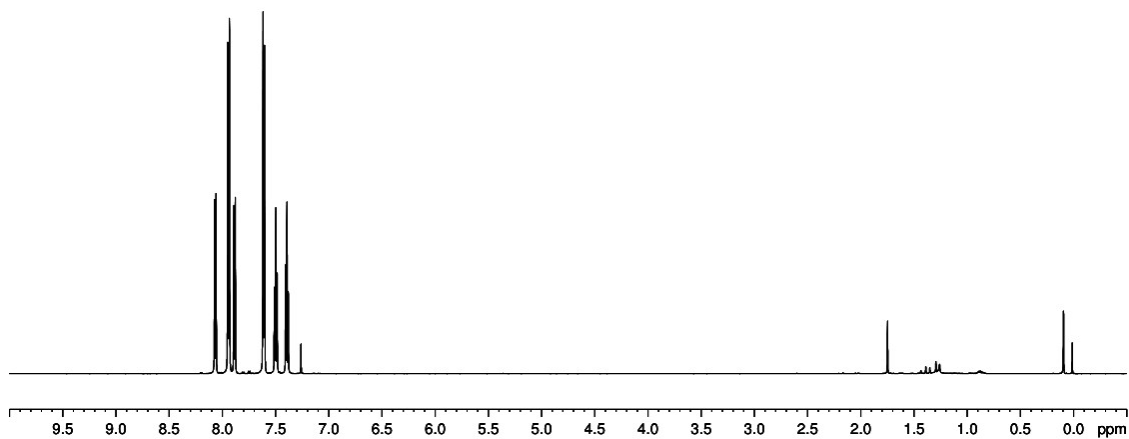

1.000  
2.019  
0.993  
2.010  
1.022  
1.010

166.619  
154.008  
134.982  
132.470  
132.166  
128.896  
126.452  
125.394  
125.368  
123.267  
121.615

77.215  
77.002  
76.791

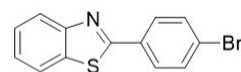

5j

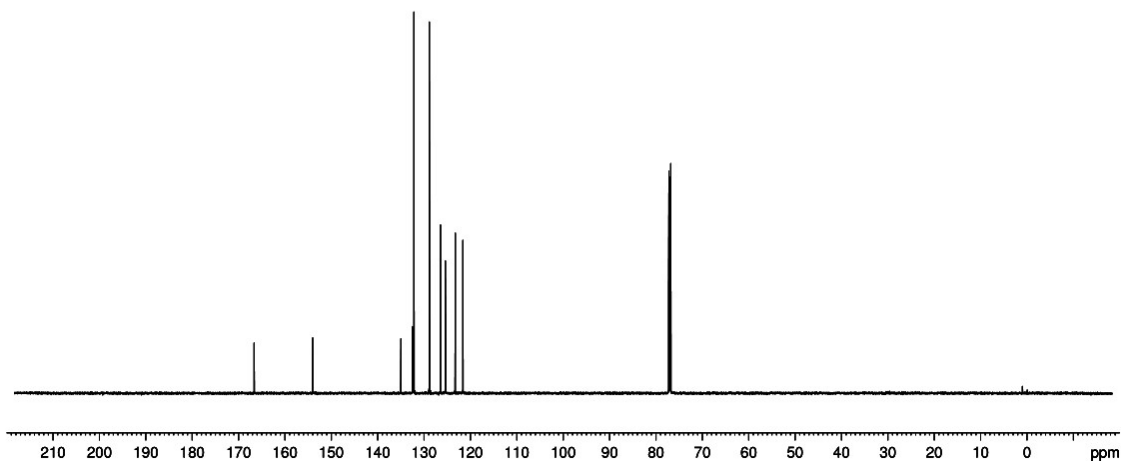



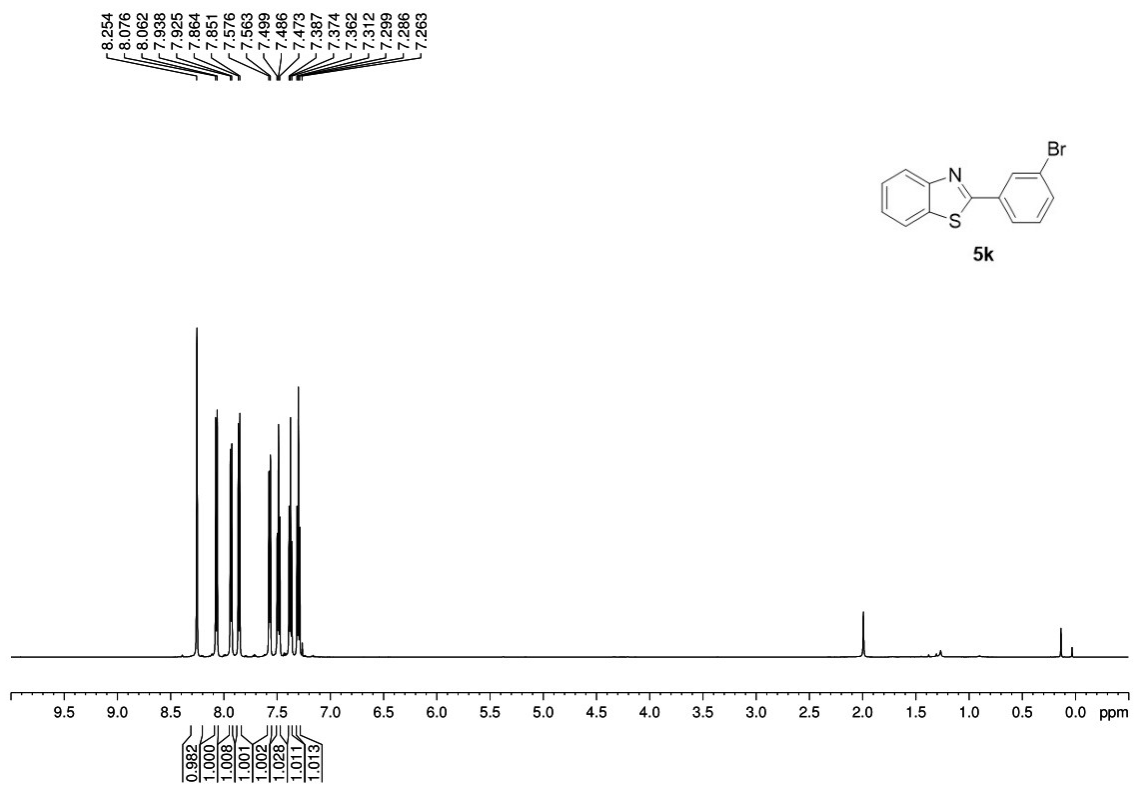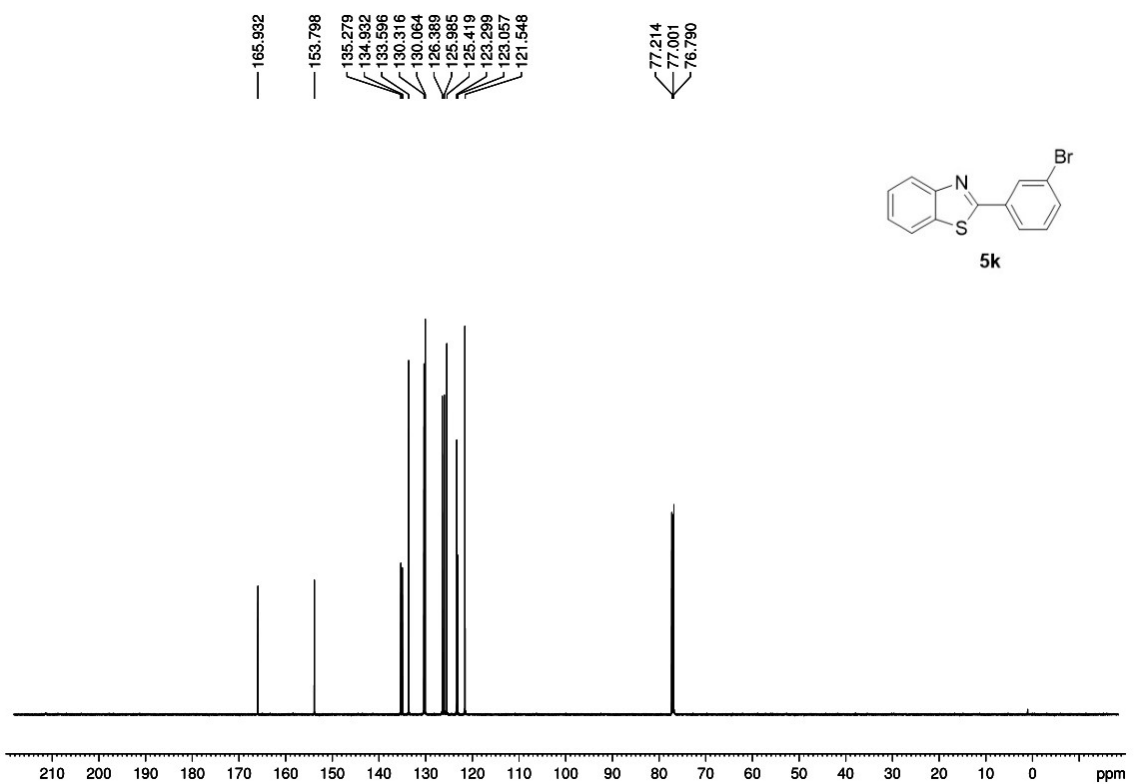

8.162  
8.149  
8.096  
8.083  
7.923  
7.910  
7.747  
7.734  
7.541  
7.529  
7.516  
7.448  
7.435  
7.423  
7.260

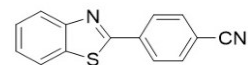

5I

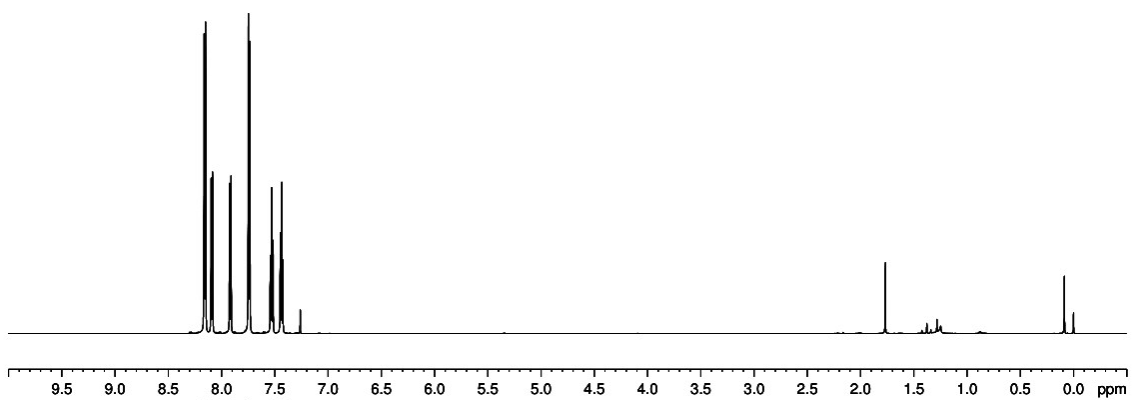

2.000  
1.001  
1.000  
2.002  
1.019  
1.011

165.222  
153.906  
137.932  
135.202  
132.654  
127.797  
126.755  
126.012  
123.713  
121.729  
118.212  
113.987

77.210  
76.999  
76.787

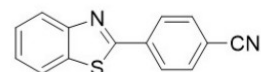

5I

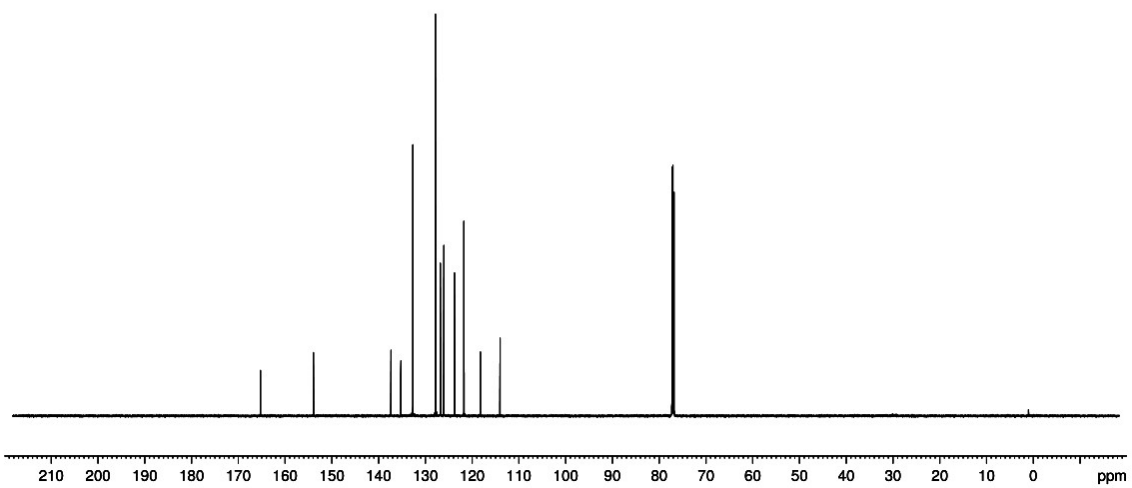

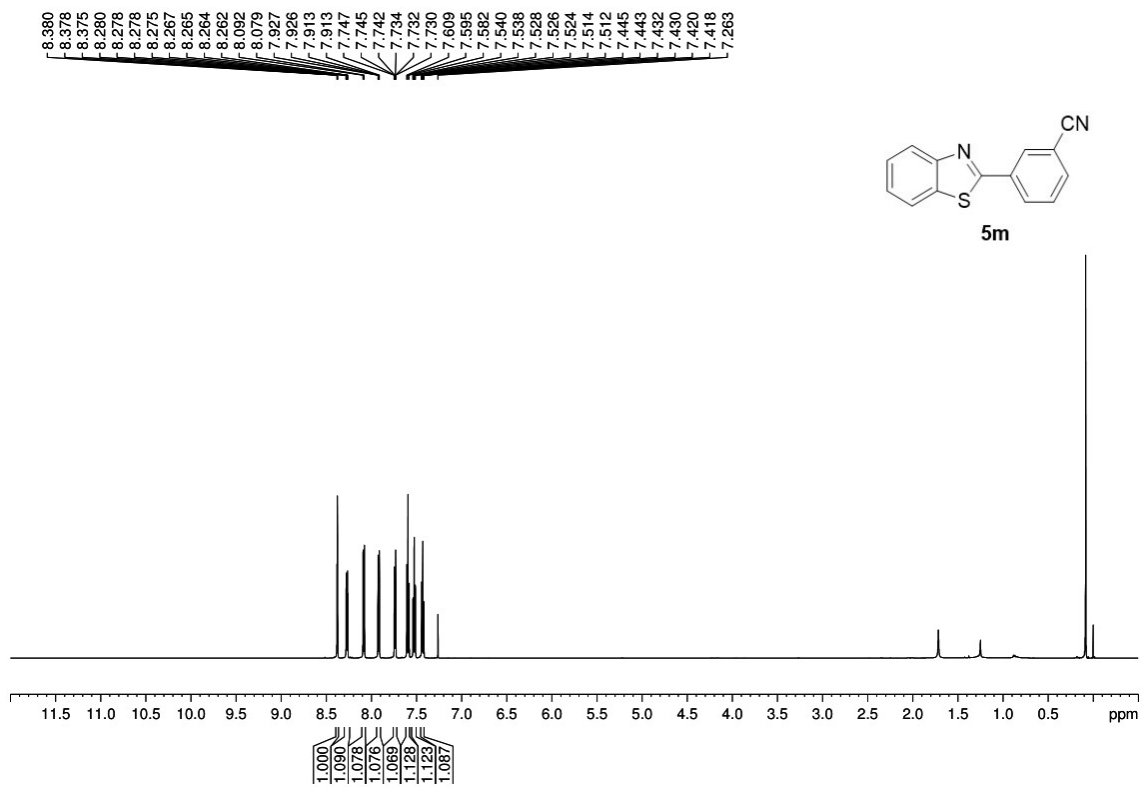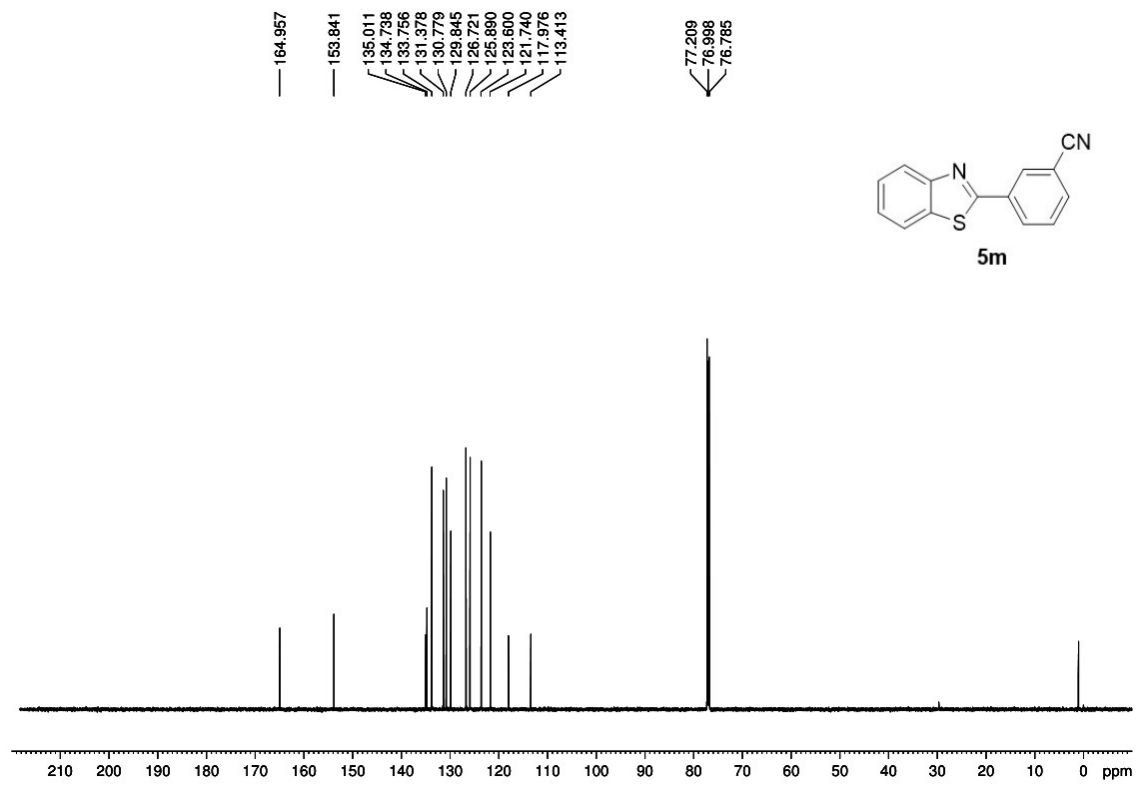

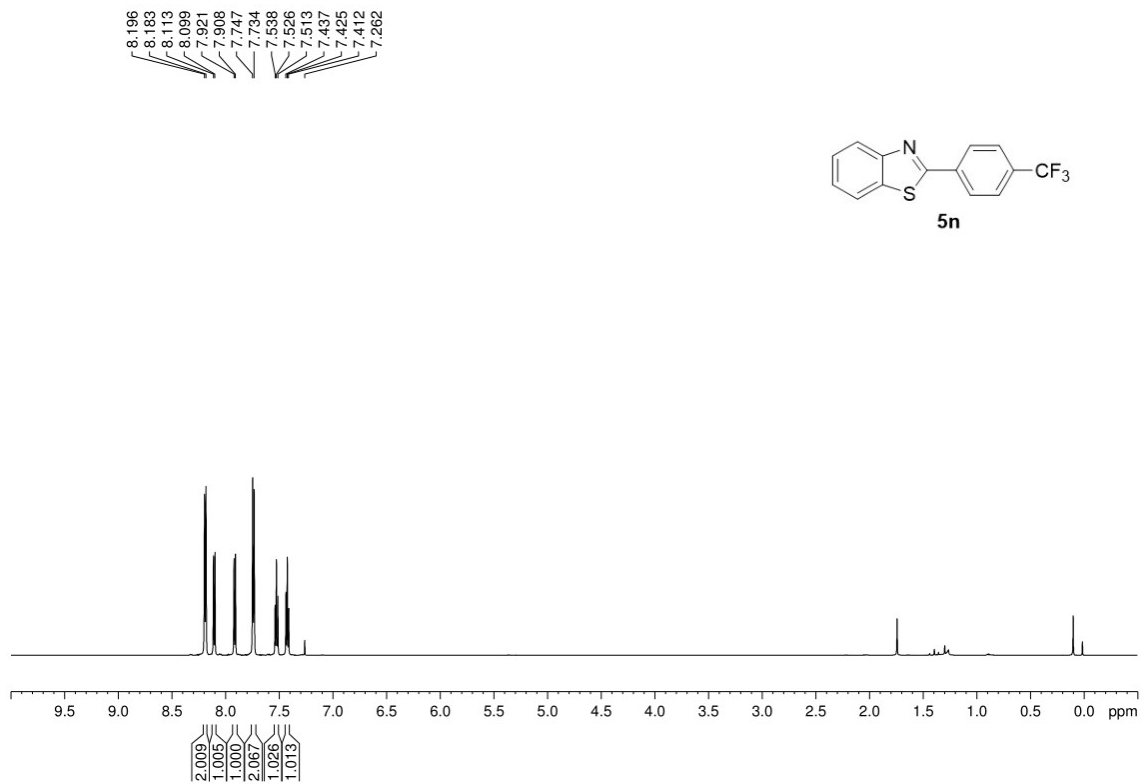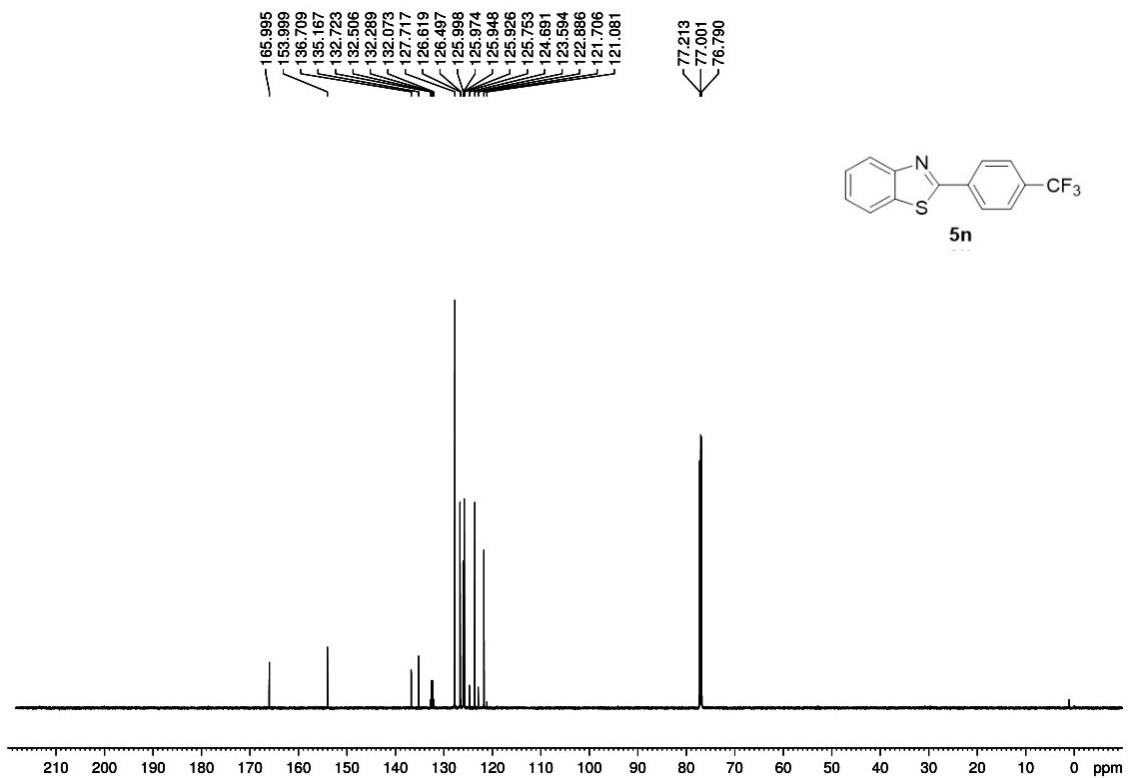

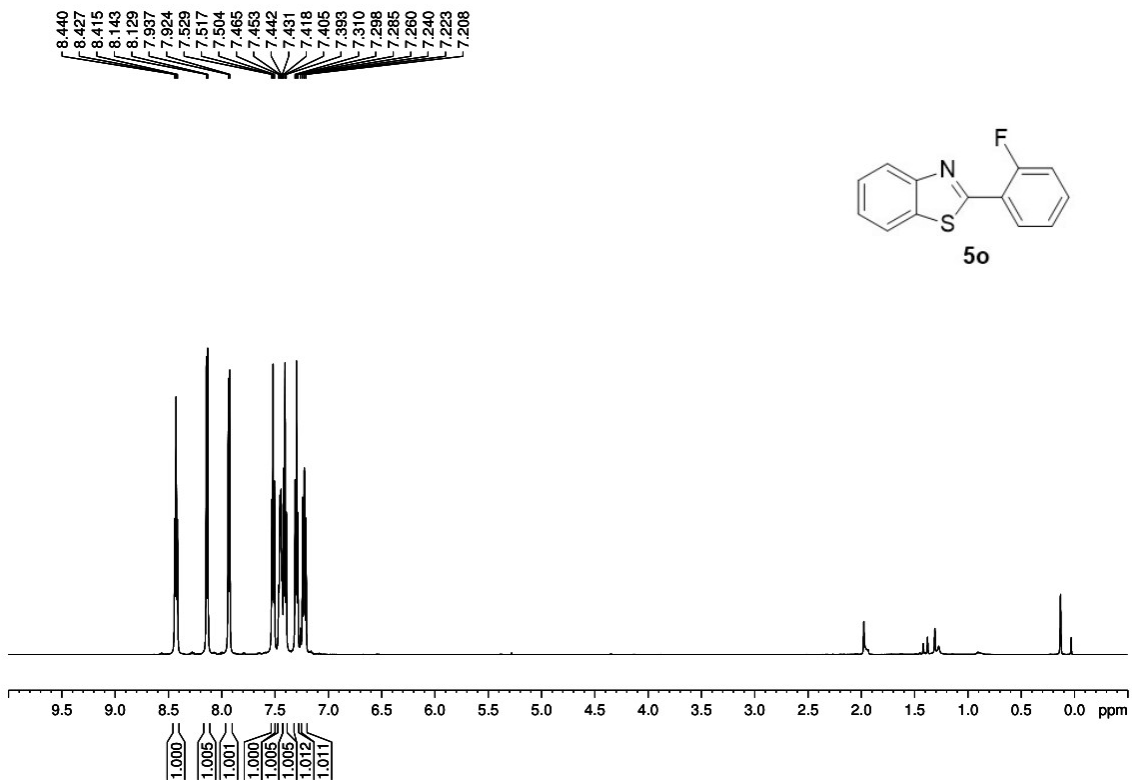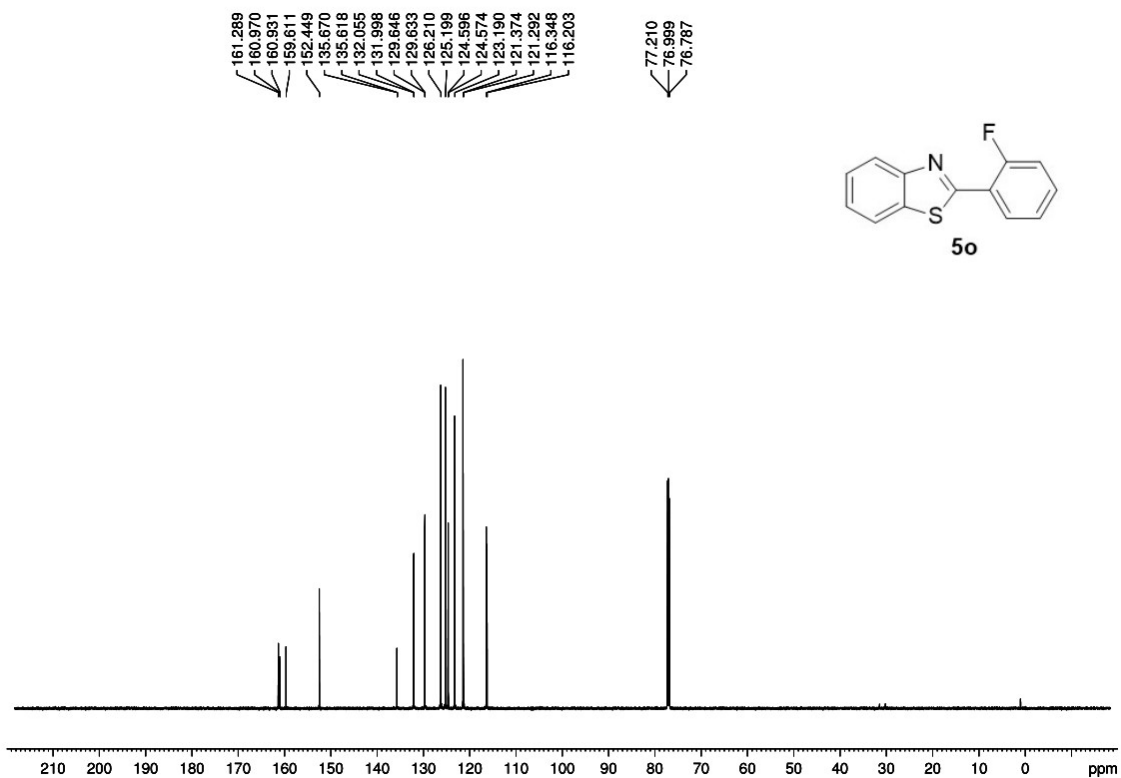

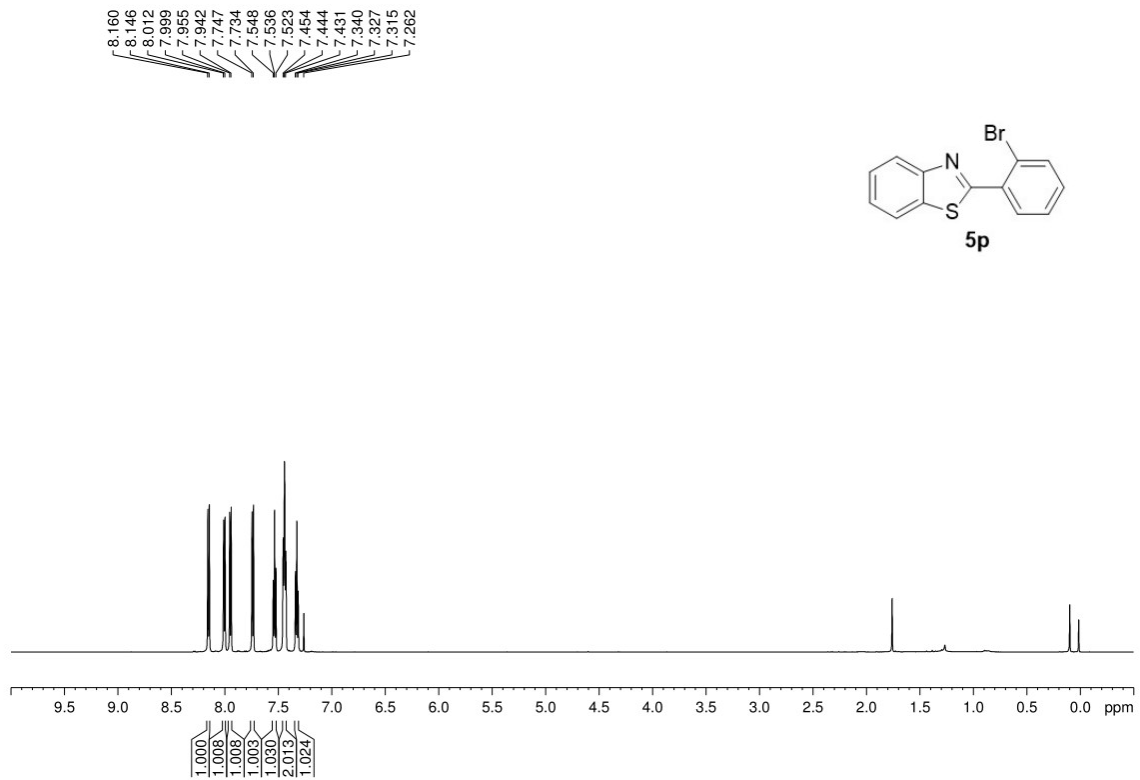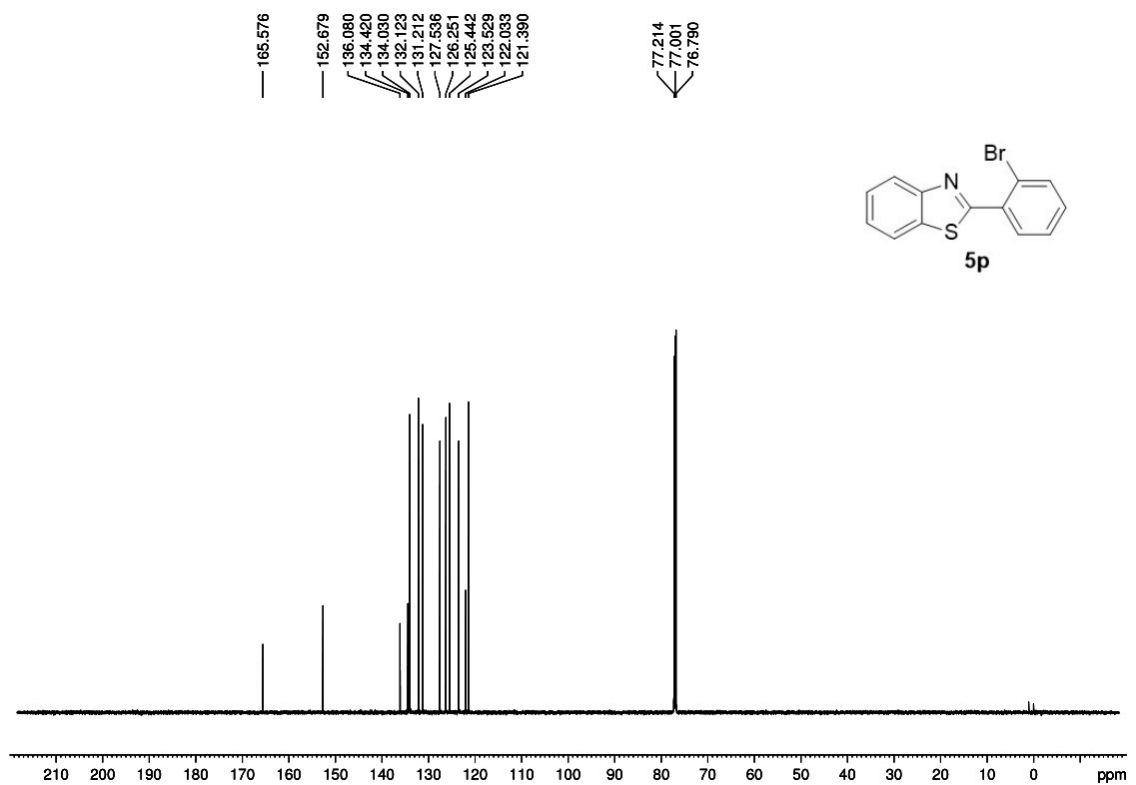

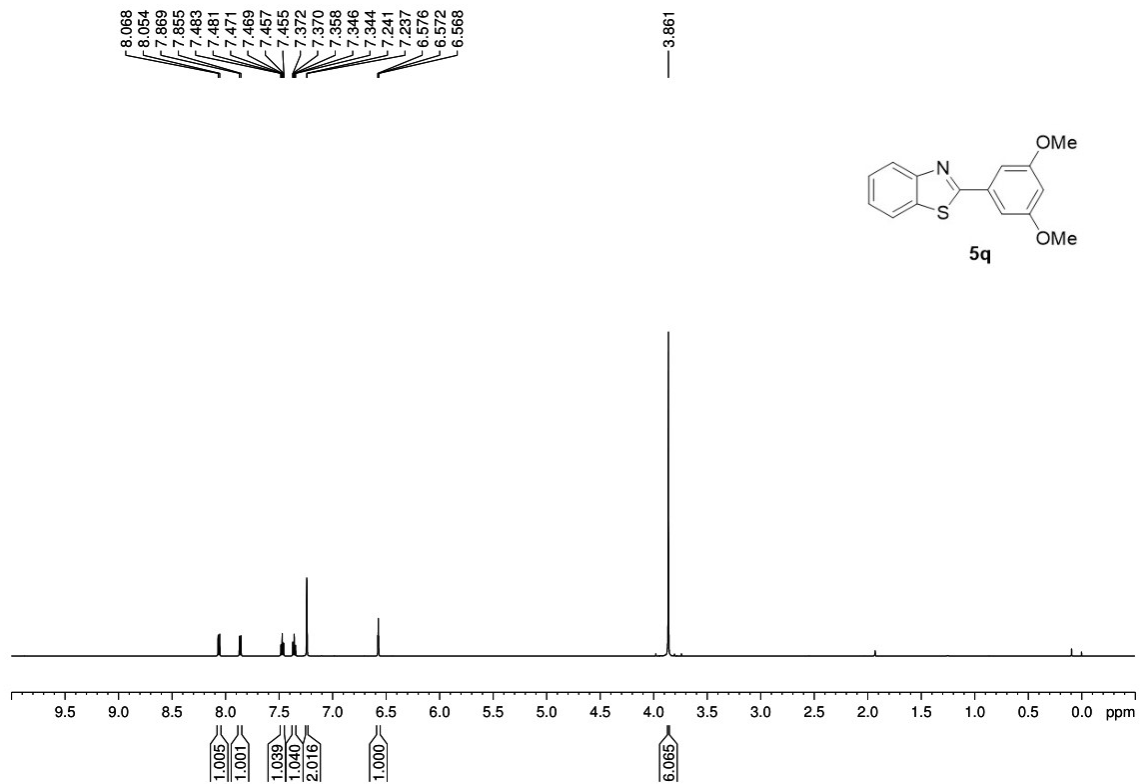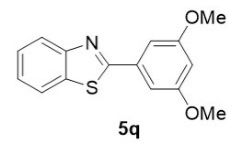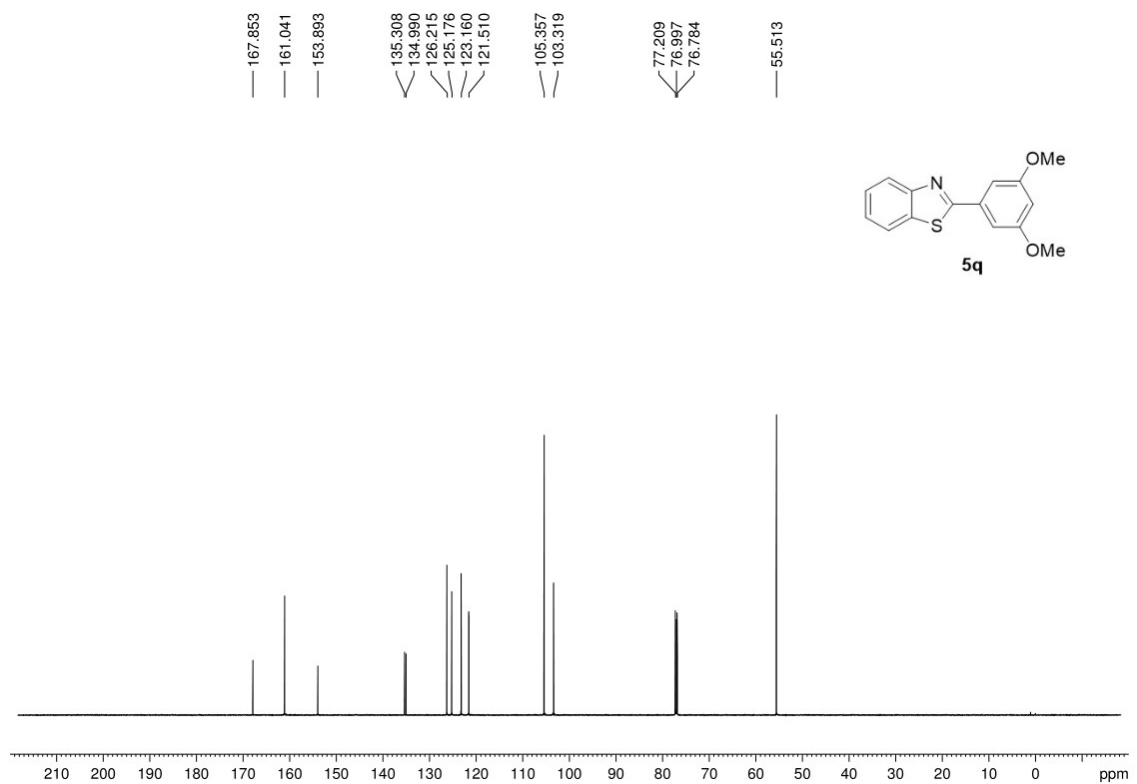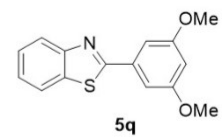

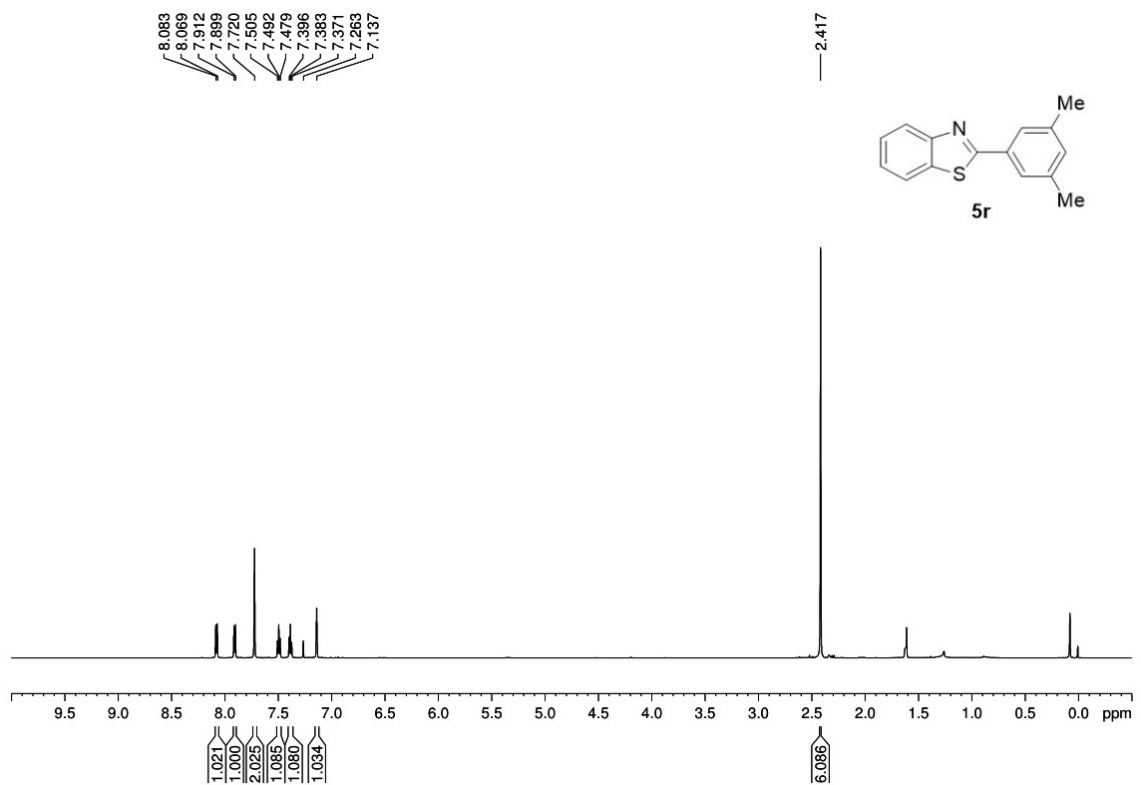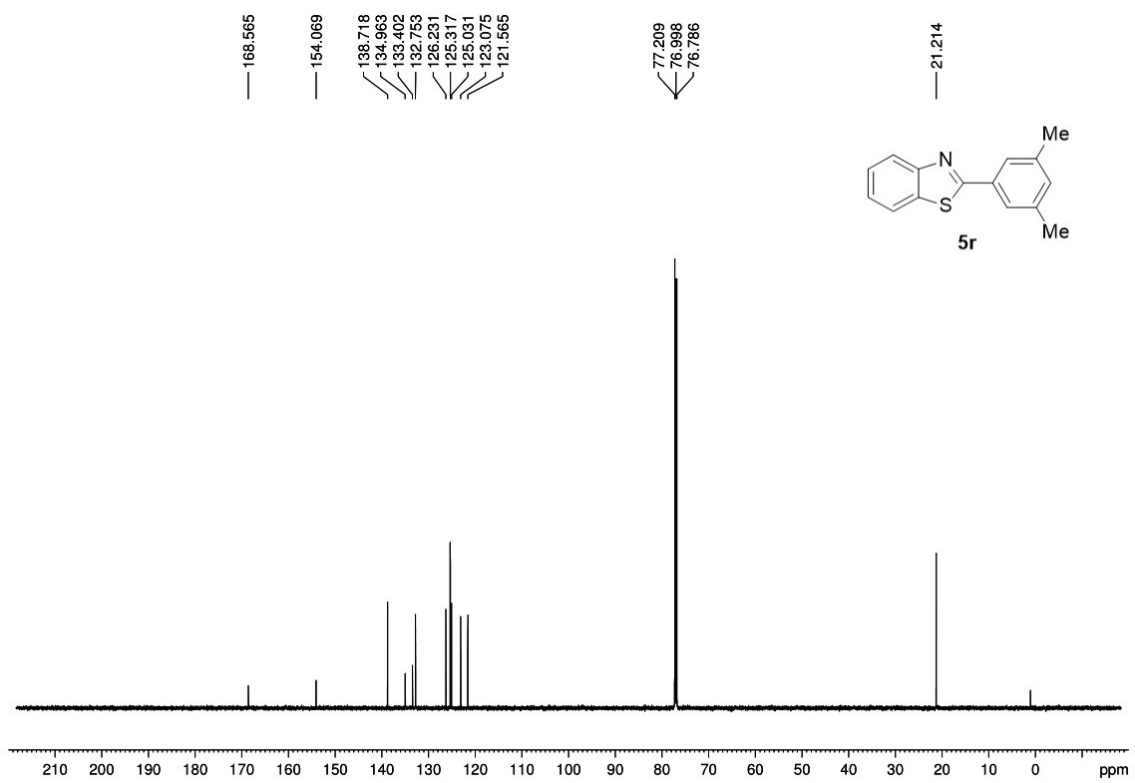



## 7. References:

1. R. Ye, H. Ruan, H. Xu, Zi. Li, L.-G. Meng, *Org. Chem. Front.*, 2021, **8**, 5345–5351.
2. P. Mampuys, Y. Zhu, S. Sergeev, E. Ruijter, R. V. A. Orru, S. V. Doorslaer, B. U. W. Maes, *Org. Lett.*, 2016, **18**, 2808–2811.
3. C. G. Overberger, M. P. Mazzeo, J. J. Godfrey, *J. Org. Chem.*, 1959, **24**, 1407–1409.
4. K. Kanemoto, Y. Sakata, T. Hosoya, S. Yoshida, *Chem. Lett.*, 2020, **49**, 593–596.
5. Y. Kawashita, J. Yanagi, T. Fujii, M. Hayashi, *Bull. Chem. Soc. Jpn.*, 2009, **82**, 482–488.
6. E. A. El Rady, *Synth. Commun.*, 2006, **36**, 37–49.
7. S. Rezazadeh, B. Akhlaghinia, N. Razavi, *Aust. J. Chem.*, 2015, **68**, 145–155.
8. Y. Gao, Q. Song, G. Cheng, X. Cui, *Org. Biomol. Chem.*, 2014, **12**, 1044–1047.
9. Y. Tong, Q. Pan, Z. Jiang, D. Miao, X. Shi, S. Han, *Tetrahedron Lett.*, 2014, **55**, 5499–5503.
10. D. Azarifar, B. Maleki, M. Setayeshnazar, *Phosphorus, Sulfur Silicon. Relat. Elem.*, 2009, **184**, 2097–2102.
11. L. Ye, J. Chen, P. Mao, Z. Mao, X. Zhang, M. Yan, *Tetrahedron Lett.*, 2017, **58**, 874–876.
12. N. Mishra, A. S. Singh, A. K. Agrahari, S. K. Singh, M. Singh, V. K. Tiwari, *ACS Comb. Sci.*, 2019, **21**, 389–399.
13. A. Shaikh, O. Ravi, S. P. Ragini, N. Sadhana, S. R. Bathula, *Tetrahedron Lett.*, 2020, **61**, 151356.
